# Supplementary material for: Theory, measurements, and modeling of OH and HO2 formation in the reaction of cyclohexyl radicals with O2
Source: Royal Society of Chemistry journal article supplement (doi:10.1039/b705934e), 2007-01-01
Supplement: b705934e.pdf [file b705934e.pdf]

Supplementary Material for **Theory, Measurements, and Modeling of OH and HO<sub>2</sub> Formation in the Reaction of Cyclohexyl Radicals with O<sub>2</sub>** Adam M. Knepp, Giovanni Meloni, Leonard E. Jusinski, Craig A. Taatjes, Carlo Cavallotti, Stephen J. Klippenstein

Measured and Modeled OH profiles for 530 K, 570 K, 600 K, 800 K at total density of  $8.5 \times 10^{17} \text{ cm}^{-3}$  and for 700 K at total density of  $3.65 \times 10^{17} \text{ cm}^{-3}$ .

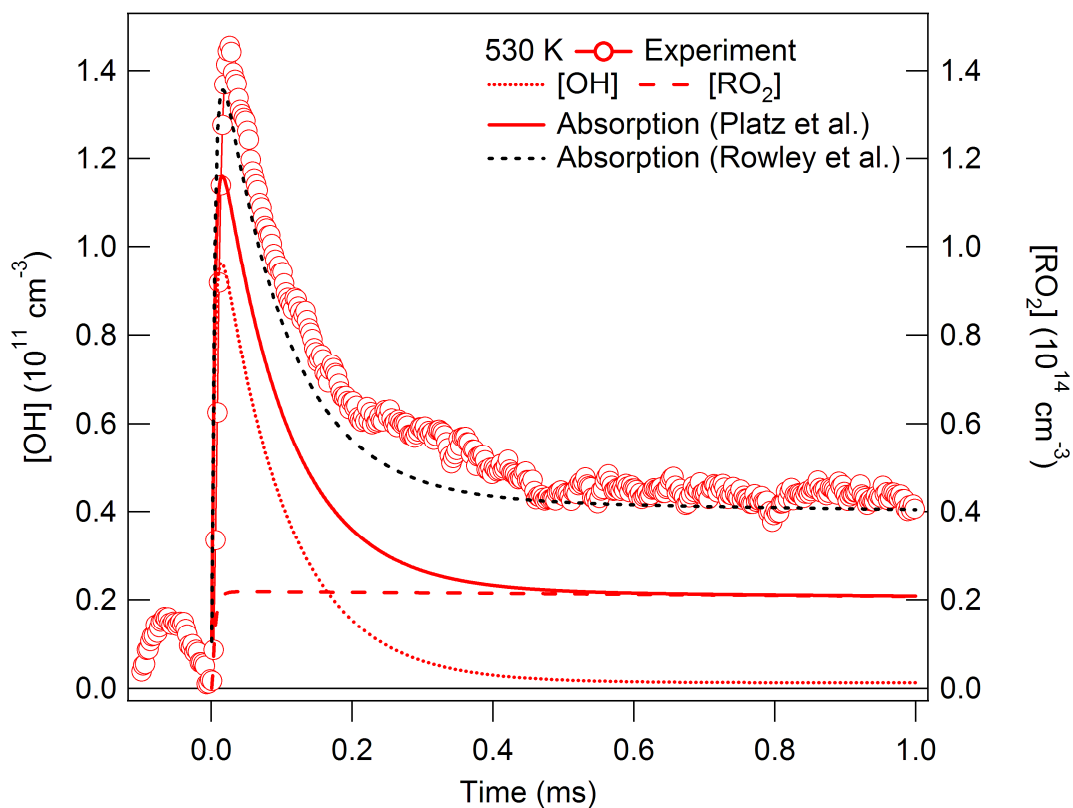

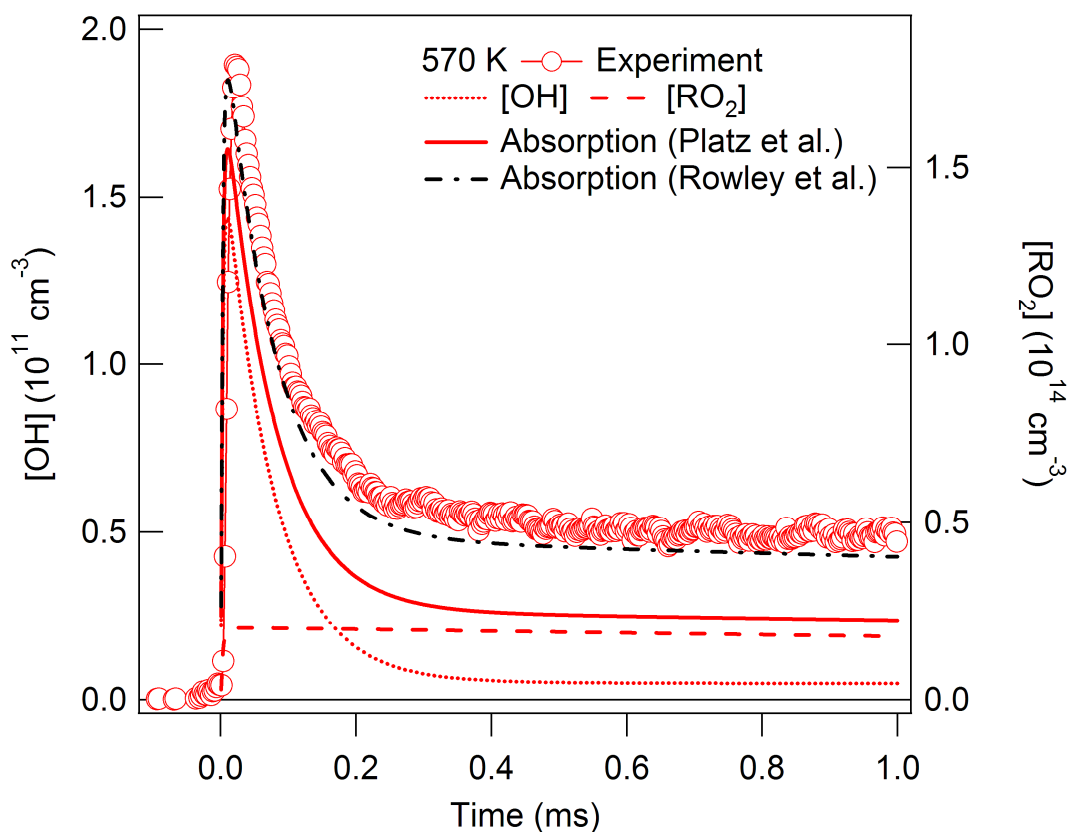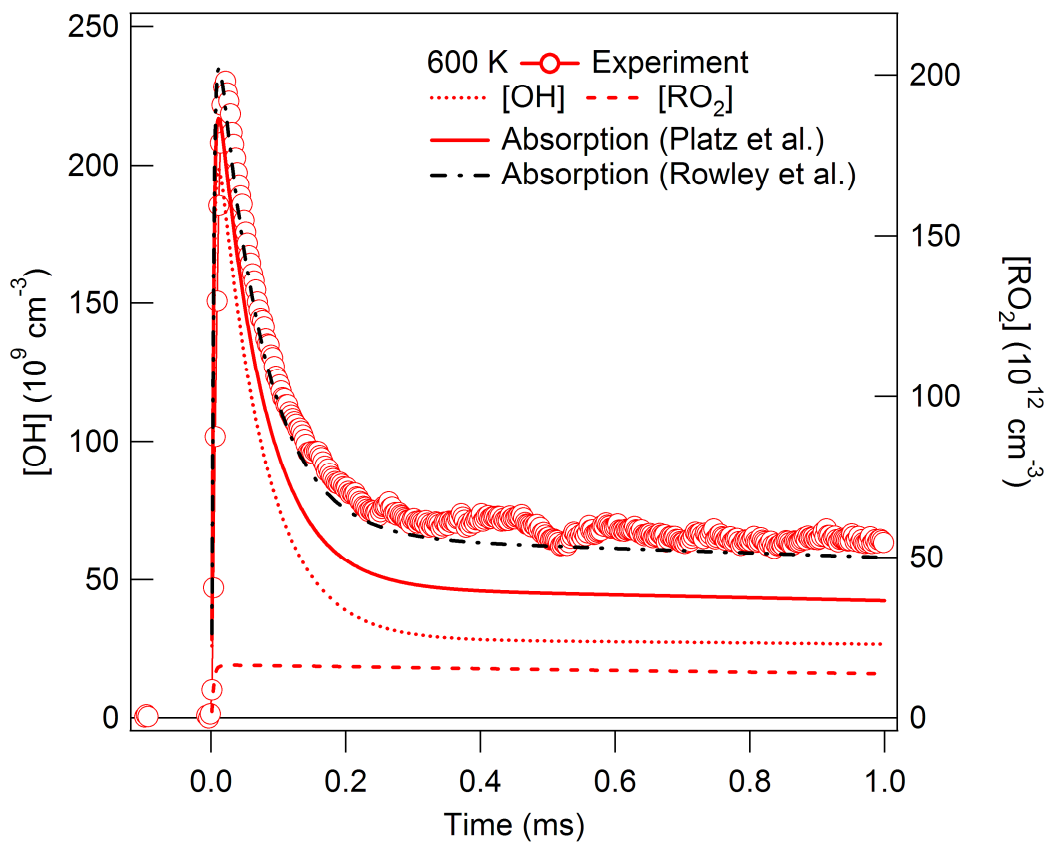

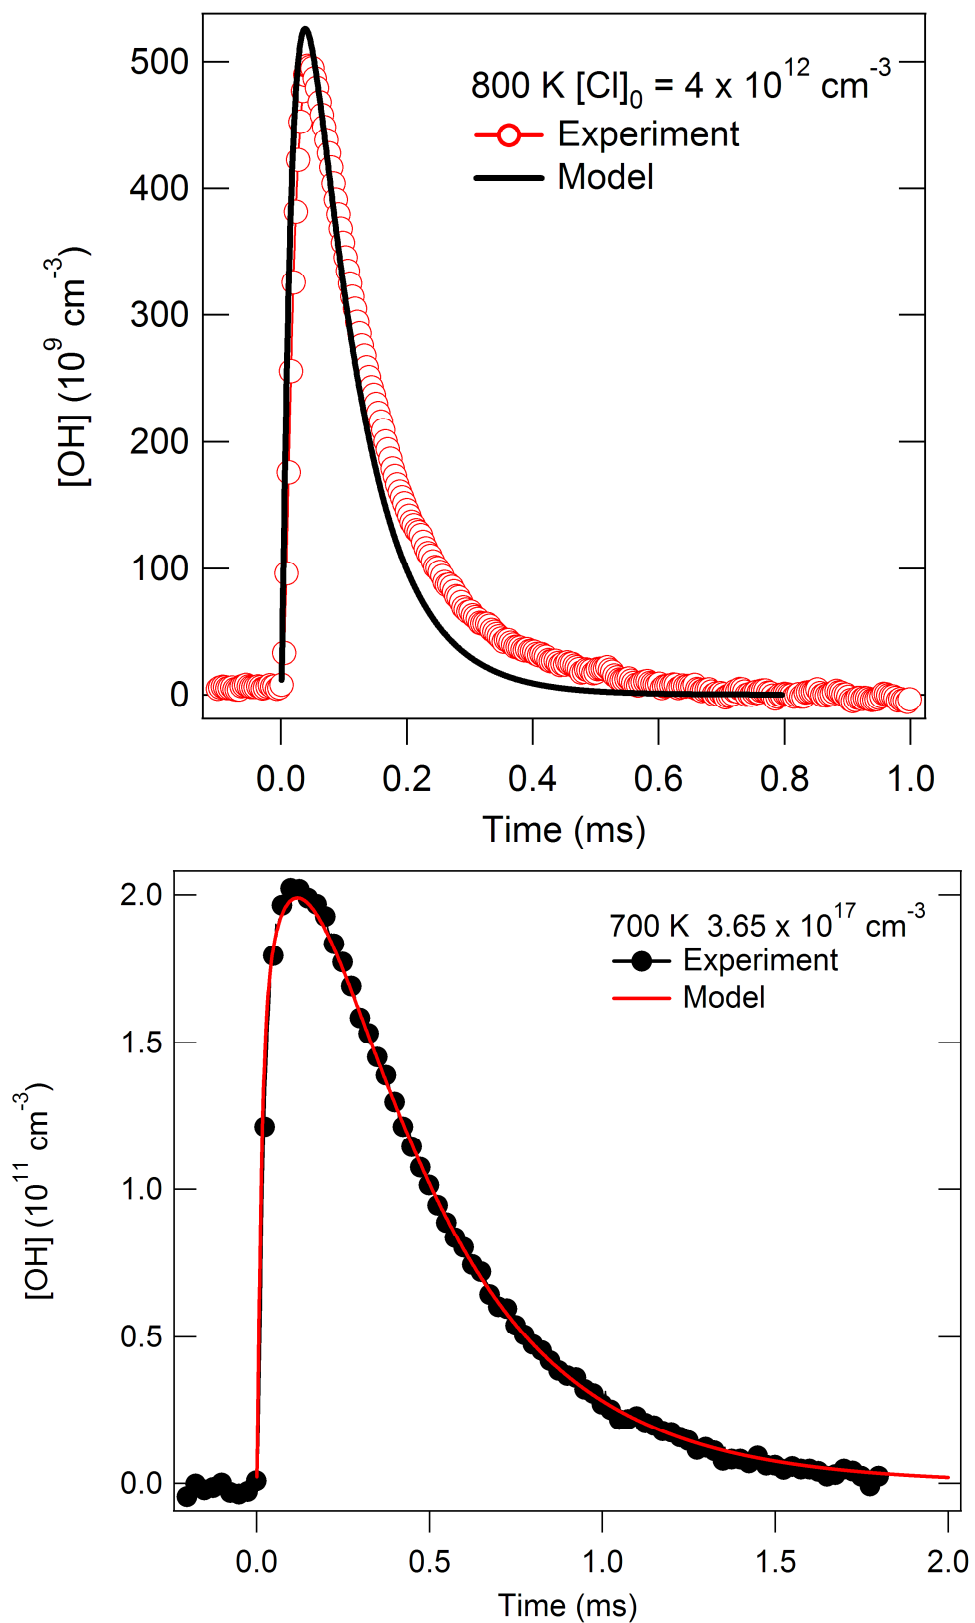

\*\*\*\*\*

b3lyp/6-311++G\*\*

cyclohexyl;chair

SCF Done: E(UB+HF-LYP) = -235.278935604 A.U. after 1 cycles

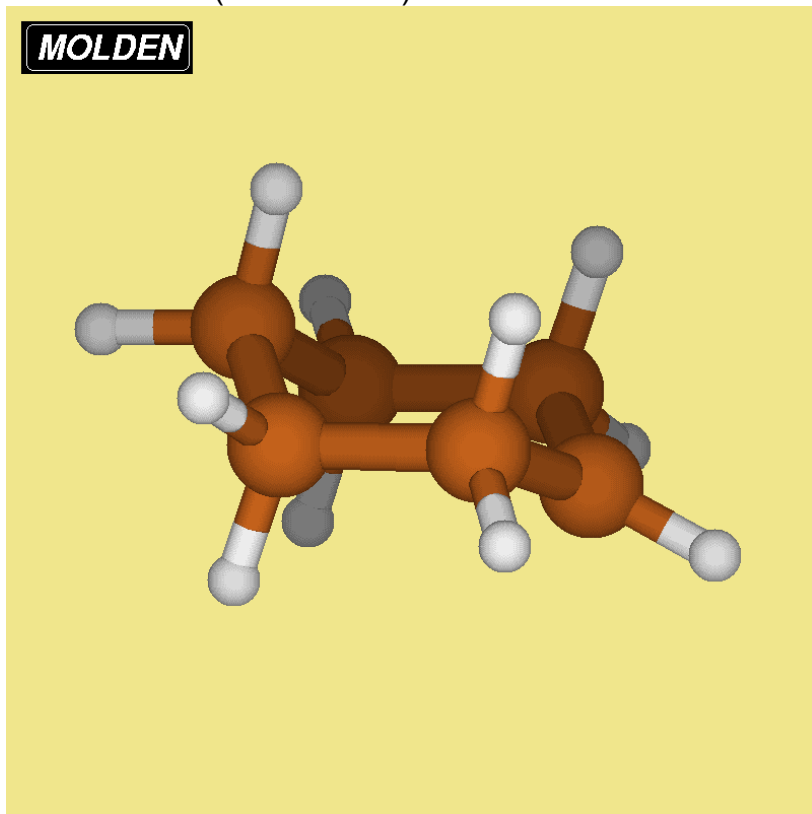

|   |           |           |           |
|---|-----------|-----------|-----------|
| C | 0.000000  | -1.412877 | 0.264874  |
| C | 1.287463  | 0.778735  | 0.159028  |
| C | -1.287463 | 0.778735  | 0.159028  |
| C | -1.268558 | -0.711882 | -0.240862 |
| C | 1.268558  | -0.711882 | -0.240862 |
| C | 0.000000  | 1.463753  | -0.166916 |
| H | 0.000000  | -1.416881 | 1.363278  |
| H | 0.000000  | -2.461864 | -0.049357 |
| H | 1.471319  | 0.835683  | 1.248890  |
| H | 2.131986  | 1.291738  | -0.311445 |
| H | -1.471319 | 0.835683  | 1.248890  |
| H | -2.131986 | 1.291738  | -0.311445 |
| H | -1.309650 | -0.788778 | -1.334059 |
| H | -2.162096 | -1.212434 | 0.146205  |
| H | 1.309650  | -0.788778 | -1.334059 |
| H | 2.162096  | -1.212434 | 0.146205  |
| H | 0.000000  | 2.518836  | -0.418841 |

---

Rotational constants (GHZ): 4.5091984 4.3193441 2.4689962  
Frequencies -- 174.6774 214.9902 327.4548

|                |           |           |           |
|----------------|-----------|-----------|-----------|
| Frequencies -- | 391.6924  | 437.6793  | 458.3503  |
| Frequencies -- | 607.3676  | 780.6128  | 804.8687  |
| Frequencies -- | 852.4110  | 868.7978  | 875.2197  |
| Frequencies -- | 924.0871  | 1012.8063 | 1029.8089 |
| Frequencies -- | 1056.5062 | 1097.0436 | 1112.1687 |
| Frequencies -- | 1128.4331 | 1152.6730 | 1252.7295 |
| Frequencies -- | 1281.2878 | 1293.6761 | 1338.7834 |
| Frequencies -- | 1345.0219 | 1350.6510 | 1376.1087 |
| Frequencies -- | 1386.2957 | 1392.6464 | 1468.0436 |
| Frequencies -- | 1471.5833 | 1487.6409 | 1491.2240 |
| Frequencies -- | 1502.7902 | 2894.1520 | 2910.7902 |
| Frequencies -- | 2995.4341 | 3009.4980 | 3010.1815 |
| Frequencies -- | 3046.9340 | 3048.0661 | 3048.6941 |
| Frequencies -- | 3050.1801 | 3061.6587 | 3160.5908 |

\*\*\*\*\*

cyC6H11 cyclo-Hexyl

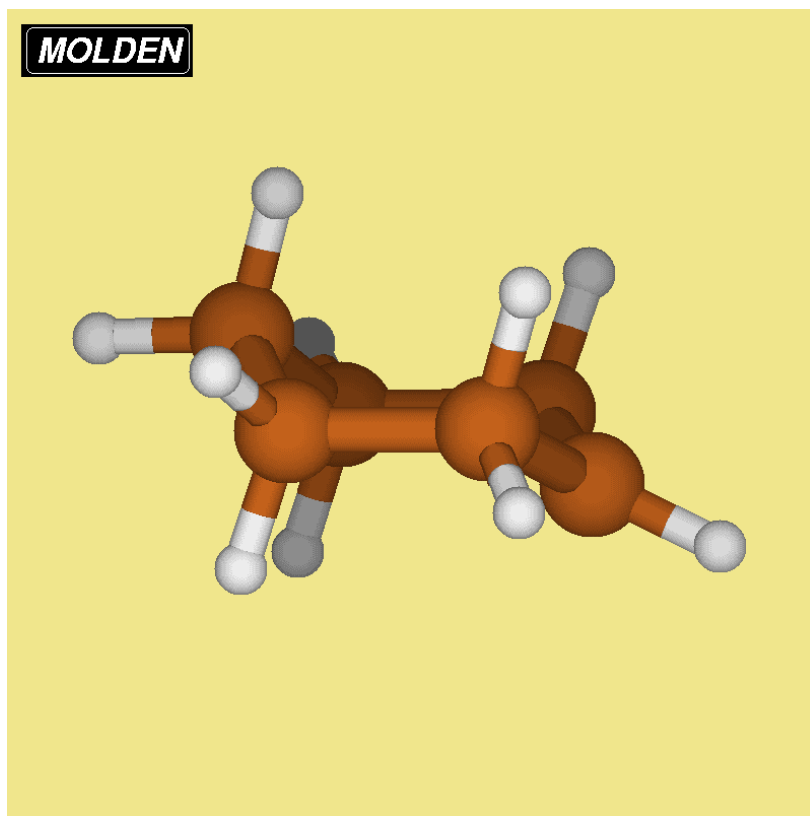

|   |          |           |           |
|---|----------|-----------|-----------|
| C | 1.290326 | 0.778229  | 0.155718  |
| C | 1.268024 | -0.713120 | -0.242113 |
| H | 2.134291 | 1.290108  | -0.321850 |
| H | 1.483783 | 0.837360  | 1.244988  |
| C | 0.000017 | -1.411394 | 0.270801  |
| H | 1.301642 | -0.791881 | -1.336922 |
| H | 2.164557 | -1.215859 | 0.139694  |

|   |           |           |           |
|---|-----------|-----------|-----------|
| H | 0.000057  | -2.465077 | -0.033394 |
| H | -0.000015 | -1.404565 | 1.370711  |
| C | -1.267971 | -0.713152 | -0.242183 |
| C | -1.290360 | 0.778145  | 0.155783  |
| H | -2.164527 | -1.215979 | 0.139465  |
| H | -1.301478 | -0.791810 | -1.337007 |
| C | -0.000060 | 1.464702  | -0.166024 |
| H | -2.134406 | 1.290011  | -0.321654 |
| H | -0.000070 | 2.530092  | -0.381002 |
| H | -1.483694 | 0.837141  | 1.245074  |

Frequencies:

|           |           |           |
|-----------|-----------|-----------|
| 176.9268  | 214.9534  | 331.2502  |
| 387.4659  | 436.4939  | 458.4178  |
| 609.4810  | 784.3327  | 809.9209  |
| 856.0652  | 874.8035  | 878.3842  |
| 928.4547  | 1019.3797 | 1035.2139 |
| 1060.1512 | 1097.6133 | 1114.8457 |
| 1132.5924 | 1160.4875 | 1258.9795 |
| 1287.7283 | 1299.2161 | 1346.7490 |
| 1353.9826 | 1366.6427 | 1388.8981 |
| 1395.8779 | 1403.7213 | 1480.0708 |
| 1484.3525 | 1500.9188 | 1503.2790 |
| 1516.5526 | 2914.9040 | 2920.1861 |
| 3015.5172 | 3029.0034 | 3029.9272 |
| 3061.8407 | 3062.3787 | 3068.2578 |
| 3073.2496 | 3078.0208 | 3178.7043 |

ROTATIONAL CONSTANTS (GHZ)      4.50574    4.31066    2.46557

\*\*\*\*\*

b3lyp/6-311++G\*\*

cyclohexyl;boat;a

SCF Done: E(UB+HF-LYP) = -235.272115843    A.U. after    1 cycles

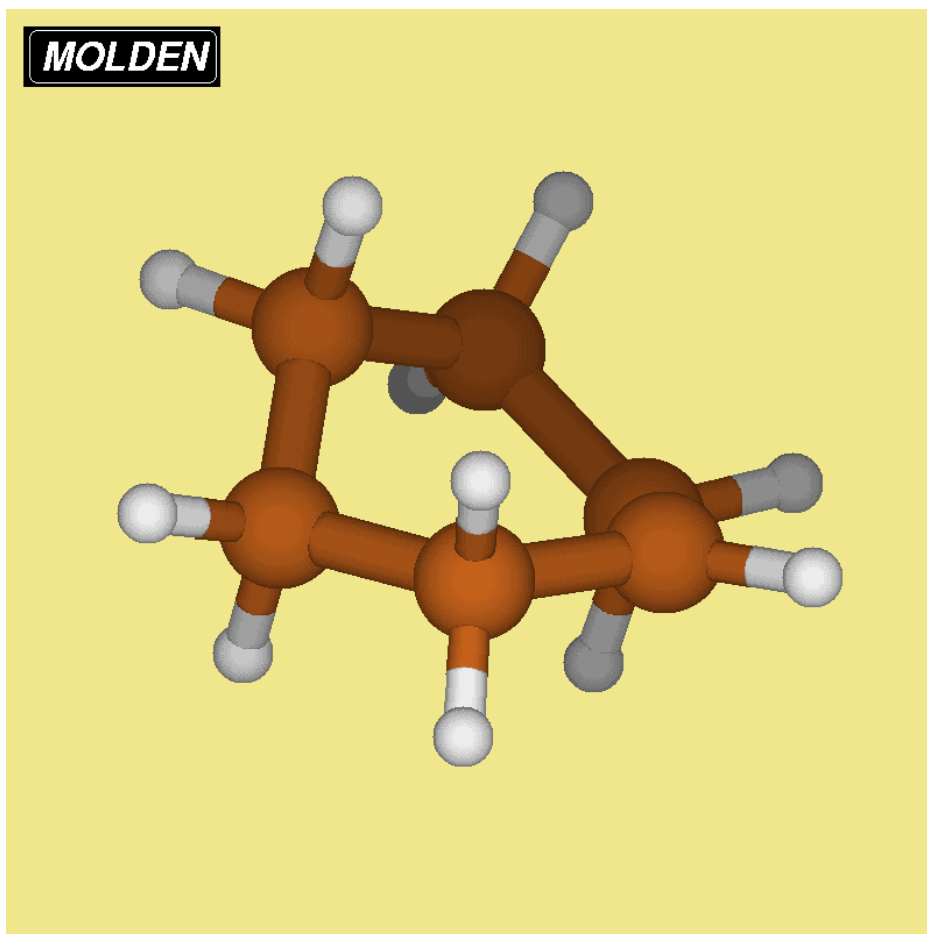

|   |           |           |           |
|---|-----------|-----------|-----------|
| C | -1.487283 | 0.362797  | -0.113855 |
| C | 1.480842  | -0.326147 | -0.073667 |
| C | 0.951540  | 1.087586  | 0.306401  |
| C | -0.943039 | -0.974787 | 0.418967  |
| C | 0.346529  | -1.349814 | -0.323877 |
| C | -0.395339 | 1.374492  | -0.269419 |
| H | 0.895982  | 1.145083  | 1.408129  |
| H | -0.739701 | -0.894522 | 1.493684  |
| H | 0.120745  | -1.392903 | -1.395927 |
| H | -0.625286 | 2.353715  | -0.675063 |
| H | -2.282880 | 0.740344  | 0.549435  |
| H | 2.136485  | -0.682110 | 0.727588  |
| H | 2.102453  | -0.250715 | -0.970467 |
| H | -1.983434 | 0.194970  | -1.082489 |
| H | 1.673823  | 1.853550  | 0.012333  |
| H | -1.696500 | -1.759658 | 0.304761  |
| H | 0.678820  | -2.352518 | -0.039290 |

---

Rotational constants (GHZ): 4.5442982 4.2367669 2.5285700  
Frequencies -- 74.8731 182.2340 274.0188

|                |           |           |           |
|----------------|-----------|-----------|-----------|
| Frequencies -- | 372.7917  | 452.7628  | 478.0499  |
| Frequencies -- | 611.8380  | 766.7110  | 801.0283  |
| Frequencies -- | 837.8918  | 868.1521  | 878.1512  |
| Frequencies -- | 923.1521  | 996.8391  | 1031.6324 |
| Frequencies -- | 1055.7248 | 1087.3464 | 1124.5693 |
| Frequencies -- | 1131.1953 | 1164.4068 | 1244.9589 |
| Frequencies -- | 1260.4297 | 1292.8402 | 1320.9786 |
| Frequencies -- | 1340.8361 | 1356.7523 | 1372.9267 |
| Frequencies -- | 1377.0765 | 1393.7215 | 1465.2861 |
| Frequencies -- | 1473.6191 | 1492.4306 | 1498.3909 |
| Frequencies -- | 1510.9004 | 2906.5456 | 2941.1544 |
| Frequencies -- | 2960.2601 | 3008.0374 | 3016.5115 |
| Frequencies -- | 3024.0460 | 3047.9900 | 3058.0281 |
| Frequencies -- | 3060.2798 | 3069.9539 | 3165.3250 |

\*\*\*\*\*

b3lyp/6-311++G\*\*

cyclohexyl;boat;b

SCF Done: E(UB+HF-LYP) = -235.272185663 A.U. after 1 cycles

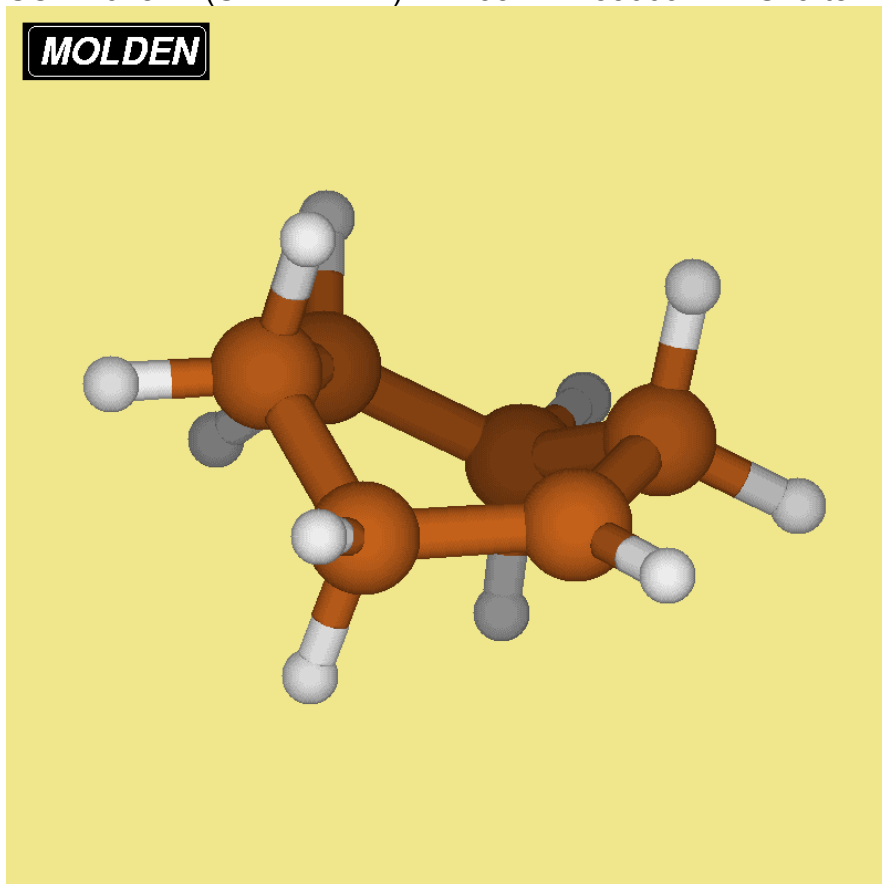

|   |           |           |           |
|---|-----------|-----------|-----------|
| C | 0.167080  | 1.486413  | -0.021200 |
| C | -0.161835 | -1.477900 | -0.024402 |
| C | -1.316343 | -0.494965 | -0.345686 |



|   |           |           |           |
|---|-----------|-----------|-----------|
| C | 1.325046  | 0.589743  | -0.329798 |
| C | 1.154521  | -0.769377 | 0.371318  |
| C | -1.145517 | 0.870225  | 0.347743  |
| H | -1.354409 | -0.318846 | -1.425893 |
| H | 1.416032  | 0.425837  | -1.419024 |
| H | 1.163268  | -0.594040 | 1.452664  |
| H | -1.219984 | 0.729319  | 1.441216  |
| H | 0.277658  | 2.564011  | -0.068019 |
| H | 0.011180  | -2.116389 | -0.896718 |
| H | -0.457504 | -2.149583 | 0.787830  |
| H | -2.277052 | -0.941411 | -0.072662 |
| H | 2.269636  | 1.059244  | -0.030959 |
| H | 2.007683  | -1.420127 | 0.157986  |
| H | -1.974215 | 1.537145  | 0.085734  |

---

|                             |           |           |           |
|-----------------------------|-----------|-----------|-----------|
| Rotational constants (GHZ): | 4.3968866 | 4.3781173 | 2.5382607 |
| Frequencies --              | 68.5175   | 223.5247  | 238.5114  |
| Frequencies --              | 336.0618  | 455.7232  | 479.5517  |
| Frequencies --              | 576.0133  | 767.3186  | 801.9733  |
| Frequencies --              | 835.4703  | 873.4826  | 879.3935  |
| Frequencies --              | 947.1907  | 1008.7731 | 1026.5353 |
| Frequencies --              | 1052.1953 | 1078.9954 | 1125.1569 |
| Frequencies --              | 1127.8358 | 1162.4681 | 1217.9831 |
| Frequencies --              | 1276.1176 | 1291.1208 | 1336.0315 |
| Frequencies --              | 1348.7987 | 1358.8130 | 1364.8937 |
| Frequencies --              | 1382.3267 | 1388.1346 | 1469.4071 |
| Frequencies --              | 1471.7095 | 1489.3579 | 1500.2376 |
| Frequencies --              | 1513.2537 | 2906.7600 | 2909.3595 |
| Frequencies --              | 3012.7011 | 3015.5505 | 3022.8386 |
| Frequencies --              | 3027.8418 | 3035.1482 | 3042.2734 |
| Frequencies --              | 3058.5442 | 3069.9316 | 3168.8103 |

[\*\*\*\*\*]

b3lyp/6-311++G\*\*

cyC6H11;chair <-> twist-boat; 2

SCF Done: E(UB+HF-LYP) = -235.271692976 A.U. after 1 cycles

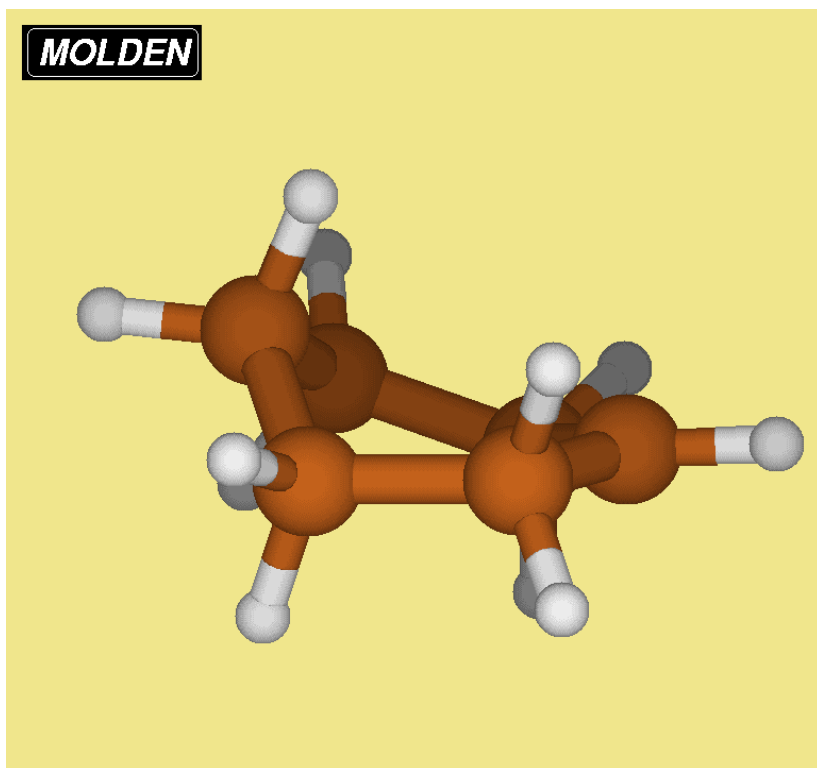

|   |           |           |           |
|---|-----------|-----------|-----------|
| C | -1.445805 | 0.532581  | -0.052831 |
| C | 1.411849  | -0.531728 | 0.056383  |
| C | 1.127774  | 0.997523  | 0.183298  |
| C | -1.067724 | -0.897458 | 0.369456  |
| C | 0.187400  | -1.351119 | -0.383618 |
| C | -0.249986 | 1.415069  | -0.222333 |
| H | 1.311528  | 1.301190  | 1.229237  |
| H | -0.870643 | -0.931294 | 1.448414  |
| H | 0.018962  | -1.228113 | -1.460884 |
| H | -0.407386 | 2.442860  | -0.534688 |
| H | -2.155537 | 0.968100  | 0.669110  |
| H | 1.755659  | -0.913027 | 1.023509  |
| H | 2.234802  | -0.697068 | -0.644941 |
| H | -2.003999 | 0.491864  | -1.001869 |
| H | 1.860989  | 1.567458  | -0.397524 |
| H | -1.905885 | -1.575682 | 0.184433  |
| H | 0.380464  | -2.415493 | -0.216933 |

---

|                             |           |           |           |
|-----------------------------|-----------|-----------|-----------|
| Rotational constants (GHZ): | 4.5311614 | 4.2226058 | 2.4801633 |
| Frequencies --              | -118.5801 | 119.7232  | 281.6889  |
| Frequencies --              | 412.6488  | 454.0372  | 474.9114  |
| Frequencies --              | 651.2861  | 755.5324  | 790.2280  |
| Frequencies --              | 843.3568  | 871.5876  | 873.0735  |
| Frequencies --              | 912.3506  | 992.2301  | 1047.6647 |
| Frequencies --              | 1054.3269 | 1082.5935 | 1127.3591 |

|                |           |           |           |
|----------------|-----------|-----------|-----------|
| Frequencies -- | 1148.8912 | 1168.7885 | 1236.6772 |
| Frequencies -- | 1263.1499 | 1293.8903 | 1328.2755 |
| Frequencies -- | 1345.0633 | 1359.9845 | 1376.1105 |
| Frequencies -- | 1379.0550 | 1401.7468 | 1466.9709 |
| Frequencies -- | 1470.0335 | 1491.8917 | 1494.6953 |
| Frequencies -- | 1507.4664 | 2903.2398 | 2944.3729 |
| Frequencies -- | 2950.2086 | 3002.7834 | 3011.8348 |
| Frequencies -- | 3020.2630 | 3025.0373 | 3051.5303 |
| Frequencies -- | 3057.6341 | 3063.8633 | 3151.7491 |

\*\*\*\*\*

b3lyp/6-311++G\*\*

5-hexen-1-yl; from cyclohexyl chair

SCF Done: E(UB+HF-LYP) = -235.244077619 A.U. after 1 cycles

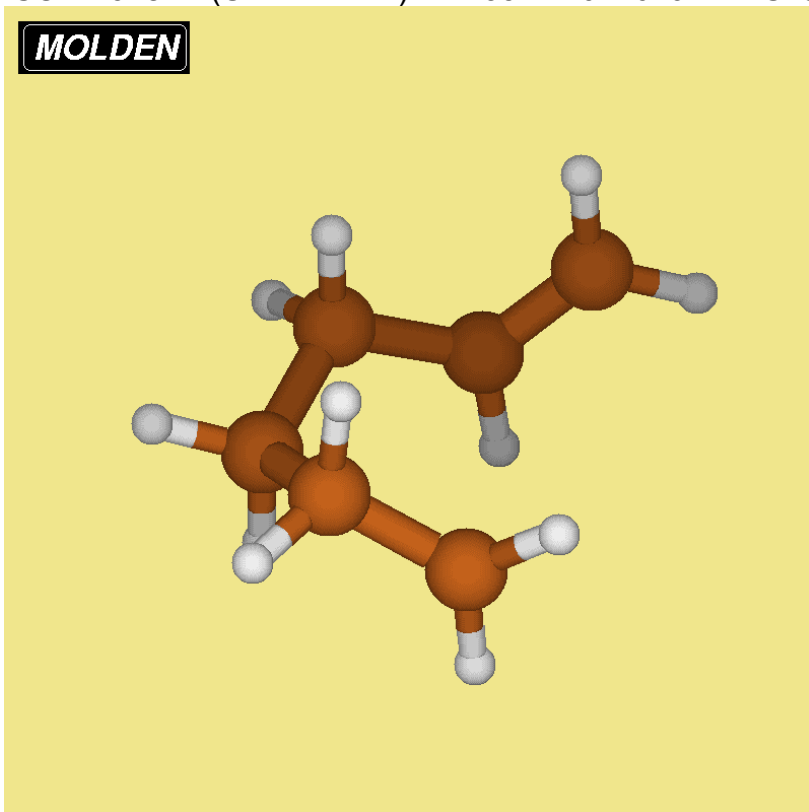

|   |           |           |           |
|---|-----------|-----------|-----------|
| C | -1.682072 | 0.132269  | -0.425899 |
| C | 2.262720  | 0.692974  | -0.271709 |
| C | 0.554895  | -1.152801 | -0.105128 |
| C | -0.948422 | -1.067426 | 0.219028  |
| C | -1.388086 | 1.451540  | 0.199979  |
| C | 1.390862  | -0.026240 | 0.433877  |
| H | -1.453644 | 0.160979  | -1.496889 |
| H | -2.762346 | -0.074022 | -0.353077 |
| H | 2.410893  | 0.525006  | -1.334597 |
| H | 0.694254  | -1.225528 | -1.189919 |
| H | 2.855755  | 1.476895  | 0.185822  |

|   |           |           |           |
|---|-----------|-----------|-----------|
| H | 0.931624  | -2.093801 | 0.318620  |
| H | -1.088091 | -1.031640 | 1.306407  |
| H | -1.551692 | 1.598577  | 1.262109  |
| H | -1.424611 | -1.993560 | -0.121380 |
| H | -1.031073 | 2.294914  | -0.375571 |
| H | 1.279550  | 0.180285  | 1.497584  |

---

|                             |           |           |           |
|-----------------------------|-----------|-----------|-----------|
| Rotational constants (GHZ): | 5.0401662 | 2.4312003 | 1.8568460 |
| Frequencies --              | 69.8598   | 84.4748   | 97.4533   |
| Frequencies --              | 140.1232  | 282.7117  | 313.9780  |
| Frequencies --              | 398.1832  | 454.5400  | 517.8709  |
| Frequencies --              | 624.7869  | 785.8266  | 797.3115  |
| Frequencies --              | 889.2795  | 924.4167  | 934.2400  |
| Frequencies --              | 947.1861  | 1017.8623 | 1023.0827 |
| Frequencies --              | 1054.9061 | 1090.0760 | 1177.0361 |
| Frequencies --              | 1207.9208 | 1244.0041 | 1279.5103 |
| Frequencies --              | 1321.3535 | 1349.6084 | 1361.1393 |
| Frequencies --              | 1376.3533 | 1451.9315 | 1460.8852 |
| Frequencies --              | 1474.8047 | 1478.3977 | 1491.3468 |
| Frequencies --              | 1693.1412 | 2943.5075 | 2992.6753 |
| Frequencies --              | 3010.3031 | 3035.3900 | 3037.4236 |
| Frequencies --              | 3053.6860 | 3115.8782 | 3125.1467 |
| Frequencies --              | 3134.5439 | 3207.1358 | 3240.5373 |

\*\*\*\*\*

b3lyp/6-311++G\*\*

cyC6H11;chair <-> 5-hexen-1-yl

SCF Done: E(UB+HF-LYP) = -235.229969366 A.U. after 1 cycles

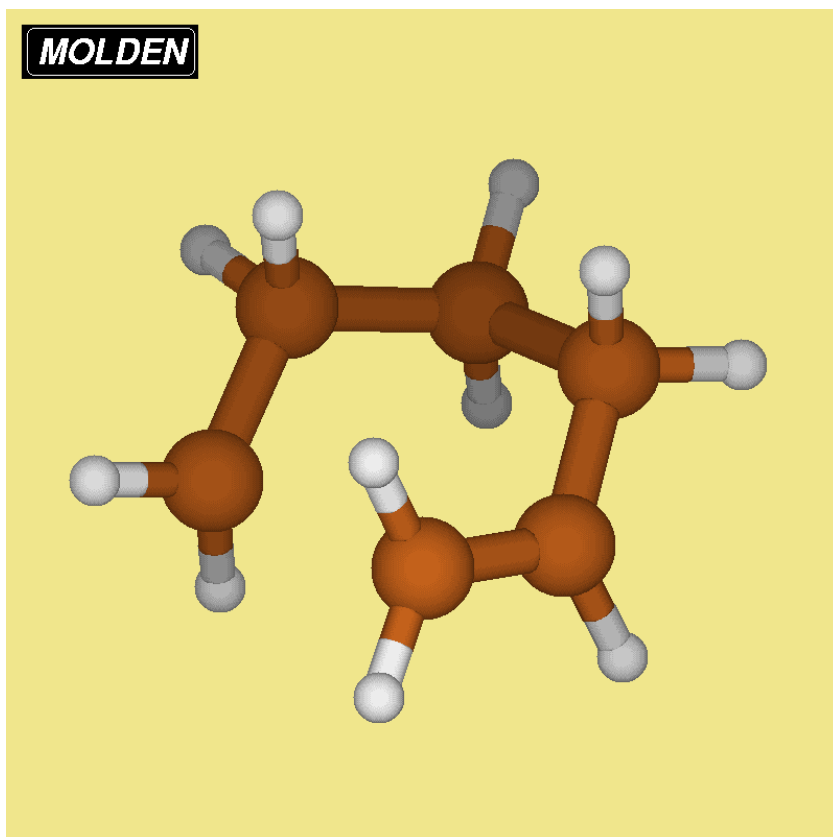

|   |           |           |           |
|---|-----------|-----------|-----------|
| C | 1.485587  | 0.030410  | 0.269370  |
| C | -1.255157 | 1.166736  | 0.276854  |
| C | -0.749321 | -1.266247 | 0.220743  |
| C | 0.731881  | -1.216252 | -0.235193 |
| C | 0.992774  | 1.340766  | -0.278130 |
| C | -1.482450 | -0.054650 | -0.275728 |
| H | 1.450804  | 0.051551  | 1.366713  |
| H | 2.551699  | -0.093983 | 0.016886  |
| H | -0.908683 | 1.254833  | 1.301189  |
| H | -0.775383 | -1.304654 | 1.316724  |
| H | -1.681815 | 2.065962  | -0.153533 |
| H | -1.210695 | -2.188797 | -0.144273 |
| H | 0.773883  | -1.246474 | -1.330798 |
| H | 0.902994  | 1.438705  | -1.355938 |
| H | 1.245186  | -2.115440 | 0.122415  |
| H | 1.277699  | 2.251677  | 0.240706  |
| H | -1.965569 | -0.117953 | -1.247583 |

---

|                             |           |           |           |
|-----------------------------|-----------|-----------|-----------|
| Rotational constants (GHZ): | 4.3490983 | 3.7368380 | 2.2932099 |
| Frequencies --              | -438.2568 | 160.8452  | 245.2759  |
| Frequencies --              | 324.2855  | 367.5222  | 423.6909  |
| Frequencies --              | 467.8799  | 534.0601  | 676.6183  |
| Frequencies --              | 740.7097  | 805.9557  | 821.3554  |

|                |           |           |           |
|----------------|-----------|-----------|-----------|
| Frequencies -- | 880.7279  | 920.2055  | 928.8061  |
| Frequencies -- | 943.3712  | 963.4661  | 1008.1239 |
| Frequencies -- | 1027.9345 | 1079.0246 | 1156.1383 |
| Frequencies -- | 1203.9811 | 1234.9583 | 1267.8282 |
| Frequencies -- | 1289.6990 | 1334.1770 | 1360.5626 |
| Frequencies -- | 1372.9274 | 1431.2151 | 1457.7776 |
| Frequencies -- | 1471.3272 | 1486.9486 | 1494.2289 |
| Frequencies -- | 1577.3384 | 2937.8534 | 3001.7314 |
| Frequencies -- | 3007.3249 | 3014.0510 | 3049.8114 |
| Frequencies -- | 3059.1549 | 3104.0737 | 3123.9668 |
| Frequencies -- | 3137.3537 | 3194.0499 | 3207.6376 |

\*\*\*\*\*

b3lyp/6-311++G\*\*

c4h7

SCF Done: E(UB+HF-LYP) = -156.597511237 A.U. after 1 cycles

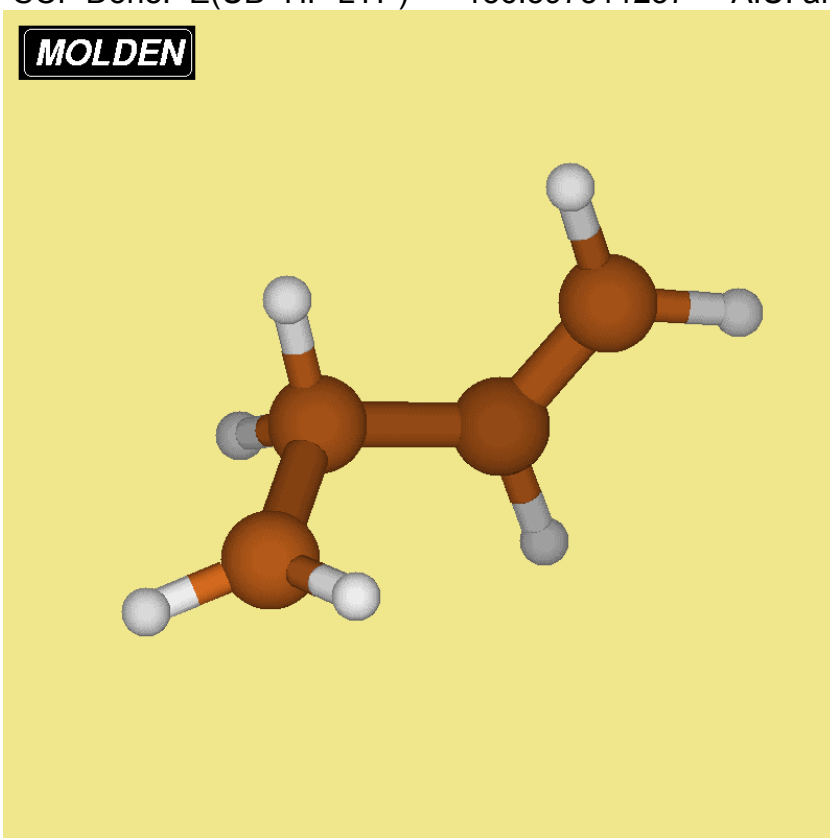

|   |           |           |           |
|---|-----------|-----------|-----------|
| C | -1.797295 | -0.047403 | -0.266208 |
| C | 0.619097  | 0.549007  | 0.131529  |
| C | 1.757243  | -0.352235 | -0.222272 |
| C | -0.663905 | -0.189922 | 0.417036  |
| H | -1.875137 | 0.641607  | -1.102297 |
| H | 0.436465  | 1.271591  | -0.681730 |
| H | -2.687979 | -0.611725 | -0.013683 |
| H | 0.894162  | 1.153915  | 1.005624  |

|   |           |           |           |
|---|-----------|-----------|-----------|
| H | 1.588209  | -1.239018 | -0.821312 |
| H | 2.779126  | -0.077033 | 0.008343  |
| H | -0.625689 | -0.896016 | 1.244544  |

---

|                             |            |           |           |
|-----------------------------|------------|-----------|-----------|
| Rotational constants (GHZ): | 24.8059123 | 4.3248066 | 4.2107596 |
| Frequencies --              | 97.8826    | 127.9030  | 325.9391  |
| Frequencies --              | 420.0317   | 501.7130  | 657.7403  |
| Frequencies --              | 797.8602   | 895.8261  | 946.2540  |
| Frequencies --              | 1024.7109  | 1044.7598 | 1075.5725 |
| Frequencies --              | 1111.7344  | 1238.1891 | 1318.6168 |
| Frequencies --              | 1335.7668  | 1443.3382 | 1457.2641 |
| Frequencies --              | 1461.2298  | 1695.7710 | 2937.6748 |
| Frequencies --              | 3009.6335  | 3121.2917 | 3129.4909 |
| Frequencies --              | 3135.4422  | 3208.3970 | 3240.7000 |

\*\*\*\*\*

b3lyp/6-311++G\*\*

C6H10;hexadiene

SCF Done: E(RB+HF-LYP) = -234.681479187 A.U. after 1 cycles

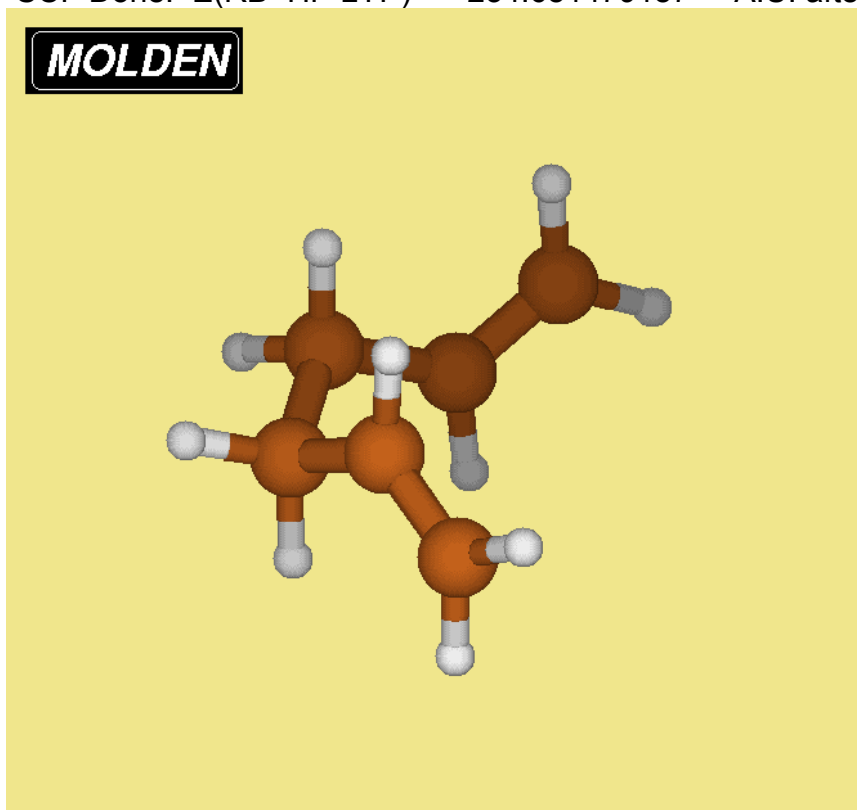

C

|          |           |           |           |
|----------|-----------|-----------|-----------|
| 1.507682 | -0.095200 | -0.462638 |           |
| C        | -2.257016 | -0.976984 | -0.194630 |
| C        | -0.757304 | 1.048353  | -0.159194 |
| C        | 0.757302  | 1.048352  | 0.159192  |
| C        | 2.257019  | -0.976981 | 0.194631  |
| C        | -1.507684 | -0.095198 | 0.462639  |

|   |           |           |           |
|---|-----------|-----------|-----------|
| H | 1.416498  | -0.186378 | -1.544715 |
| H | -2.375061 | -0.931737 | -1.273387 |
| H | -0.906975 | 1.043945  | -1.244458 |
| H | -2.779505 | -1.775334 | 0.320402  |
| H | -1.177002 | 1.992470  | 0.211039  |
| H | 0.906974  | 1.043946  | 1.244456  |
| H | 2.375068  | -0.931730 | 1.273387  |
| H | 1.177001  | 1.992468  | -0.211042 |
| H | 2.779509  | -1.775331 | -0.320399 |
| H | -1.416504 | -0.186372 | 1.544716  |

---

|                             |           |           |           |
|-----------------------------|-----------|-----------|-----------|
| Rotational constants (GHZ): | 5.8757844 | 2.0698219 | 1.7195566 |
| Frequencies --              | 58.5004   | 95.6928   | 101.6788  |
| Frequencies --              | 265.1234  | 340.8482  | 421.3098  |
| Frequencies --              | 436.6839  | 620.2658  | 660.1703  |
| Frequencies --              | 824.0955  | 871.8644  | 940.4488  |
| Frequencies --              | 941.5051  | 944.8160  | 983.7642  |
| Frequencies --              | 1023.2883 | 1024.1754 | 1032.1611 |
| Frequencies --              | 1052.4989 | 1190.3280 | 1237.6349 |
| Frequencies --              | 1247.7993 | 1322.8280 | 1323.1902 |
| Frequencies --              | 1345.6730 | 1361.3440 | 1448.6317 |
| Frequencies --              | 1454.1891 | 1477.3000 | 1486.3444 |
| Frequencies --              | 1701.2738 | 1701.6919 | 2998.7994 |
| Frequencies --              | 3009.6222 | 3039.1426 | 3053.7520 |
| Frequencies --              | 3110.8838 | 3112.3113 | 3125.0995 |
| Frequencies --              | 3125.4535 | 3207.1484 | 3207.3404 |

\*\*\*\*\*

b3lyp/6-311++G\*\*

5-hexen-1-yl <-> c5h9ch2

SCF Done: E(UB+HF-LYP) = -235.233723239 A.U. after 1 cycles



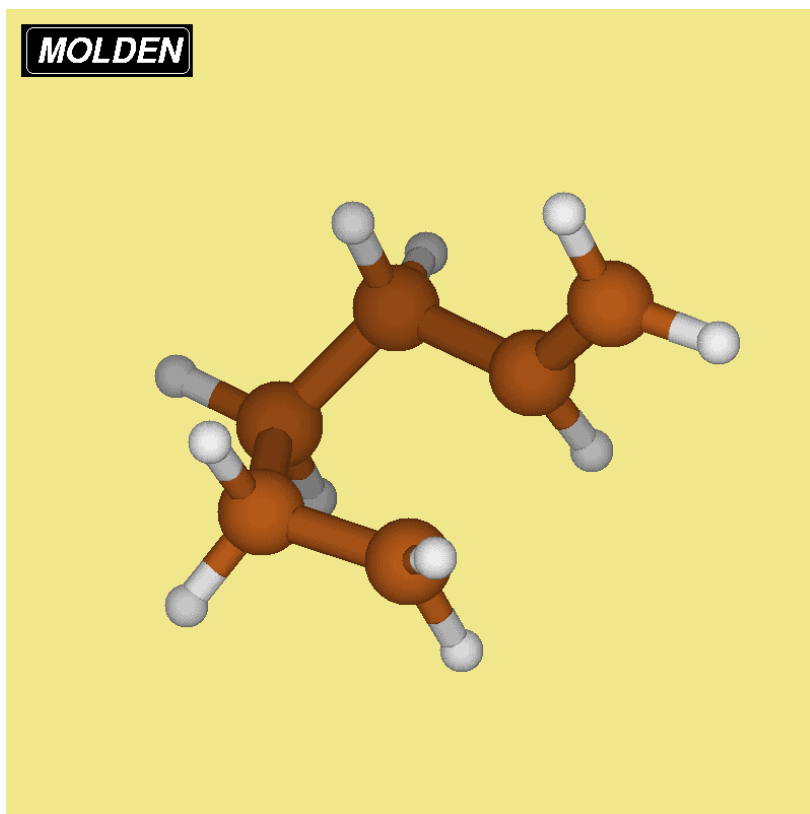

|   |           |           |           |
|---|-----------|-----------|-----------|
| C | -1.527192 | 0.552966  | -0.378540 |
| C | 2.217823  | 0.222926  | -0.270417 |
| C | 0.159160  | -1.237925 | -0.079448 |
| C | -1.309525 | -0.870728 | 0.163644  |
| C | -0.474328 | 1.455128  | 0.191579  |
| C | 1.091115  | -0.150749 | 0.413445  |
| h | -1.459584 | 0.538650  | -1.471706 |
| h | -2.538749 | 0.903089  | -0.128910 |
| h | 2.359508  | -0.047371 | -1.311965 |
| h | 0.329152  | -1.398648 | -1.150247 |
| h | 2.962761  | 0.871029  | 0.176183  |
| h | 0.404876  | -2.180391 | 0.424063  |
| h | -1.519650 | -0.885491 | 1.240241  |
| h | -0.564842 | 1.739642  | 1.236490  |
| h | -1.987239 | -1.592072 | -0.303648 |
| h | -0.010724 | 2.203983  | -0.439970 |
| h | 1.082172  | 0.017864  | 1.487892  |

---

|                             |           |           |           |
|-----------------------------|-----------|-----------|-----------|
| Rotational constants (GHZ): | 5.3814876 | 2.9270921 | 2.1649939 |
| Frequencies --              | -461.0426 | 100.6326  | 247.4372  |
| Frequencies --              | 281.3295  | 393.5287  | 414.7822  |
| Frequencies --              | 513.4935  | 564.5527  | 578.7632  |
| Frequencies --              | 784.4280  | 810.4113  | 826.5639  |
| Frequencies --              | 848.0813  | 895.7186  | 921.1659  |

|                |           |           |           |
|----------------|-----------|-----------|-----------|
| Frequencies -- | 923.0337  | 979.8945  | 1005.8075 |
| Frequencies -- | 1024.8282 | 1070.4408 | 1177.3958 |
| Frequencies -- | 1180.6940 | 1238.4017 | 1253.5656 |
| Frequencies -- | 1278.5262 | 1335.4095 | 1344.7752 |
| Frequencies -- | 1358.7284 | 1434.0821 | 1464.7659 |
| Frequencies -- | 1479.5923 | 1483.7082 | 1498.7145 |
| Frequencies -- | 1543.7176 | 2982.0133 | 3009.3120 |
| Frequencies -- | 3013.1068 | 3039.6036 | 3046.5530 |
| Frequencies -- | 3063.7090 | 3109.7110 | 3123.2256 |
| Frequencies -- | 3127.4295 | 3205.8363 | 3215.6405 |

\*\*\*\*\*

b3lyp/6-311++G\*\*

5-hexen-1-yl <-> c4h7+c2h4

SCF Done: E(UB+HF-LYP) = -235.200574407 A.U. after 1 cycles

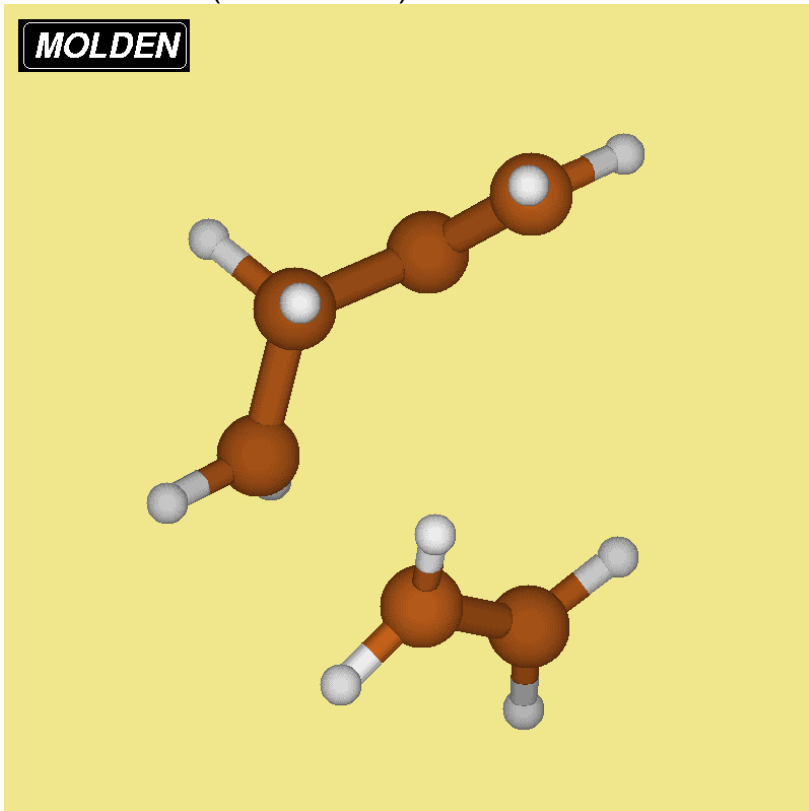

|   |           |           |           |
|---|-----------|-----------|-----------|
| C | -1.876082 | -0.123302 | 0.575561  |
| C | 2.061406  | -1.173980 | 0.249603  |
| C | 0.964703  | 1.092703  | 0.160748  |
| C | -0.428086 | 1.445242  | -0.283550 |
| C | -2.073259 | -1.140072 | -0.305768 |
| C | 1.507404  | -0.177345 | -0.436477 |
| H | -1.191271 | -0.246422 | 1.406546  |
| H | -2.625287 | 0.651776  | 0.689229  |
| H | 2.149293  | -1.141593 | 1.331781  |
| H | 1.021263  | 1.046038  | 1.254555  |

|   |           |           |           |
|---|-----------|-----------|-----------|
| H | 2.449307  | -2.057589 | -0.244808 |
| H | 1.638471  | 1.919416  | -0.130741 |
| H | -0.666325 | 1.321524  | -1.335119 |
| H | -2.856924 | -1.095849 | -1.054170 |
| H | -0.885994 | 2.312480  | 0.184061  |
| H | -1.406878 | -1.993878 | -0.341395 |
| H | 1.437833  | -0.255382 | -1.520637 |

---

|                             |           |           |           |
|-----------------------------|-----------|-----------|-----------|
| Rotational constants (GHZ): | 4.3536995 | 2.0835353 | 1.5930239 |
| Frequencies --              | -415.1211 | 43.0994   | 71.2947   |
| Frequencies --              | 85.9991   | 185.2223  | 233.0437  |
| Frequencies --              | 315.4192  | 385.5760  | 441.5984  |
| Frequencies --              | 552.5244  | 644.2274  | 768.2531  |
| Frequencies --              | 820.2422  | 851.3358  | 857.0873  |
| Frequencies --              | 889.3522  | 942.1264  | 972.9240  |
| Frequencies --              | 993.1769  | 1014.0136 | 1028.3570 |
| Frequencies --              | 1063.4775 | 1175.6374 | 1226.2955 |
| Frequencies --              | 1239.0007 | 1292.7437 | 1318.9751 |
| Frequencies --              | 1340.2614 | 1449.9005 | 1457.6294 |
| Frequencies --              | 1463.7008 | 1466.0314 | 1569.1832 |
| Frequencies --              | 1700.1178 | 2913.7075 | 3027.2682 |
| Frequencies --              | 3105.8454 | 3117.6162 | 3125.9774 |
| Frequencies --              | 3126.8990 | 3135.5625 | 3198.5338 |
| Frequencies --              | 3203.0277 | 3207.0403 | 3229.7502 |

\*\*\*\*\*

b3lyp/6-311++G\*\*

|                          |                |            |           |
|--------------------------|----------------|------------|-----------|
| SCF Done: E(UB+HF-LYP) = | -235.272115843 | A.U. after | 1 cycles  |
| Frequencies --           | 74.8731        | 182.2340   | 274.0188  |
| Frequencies --           | 372.7917       | 452.7628   | 478.0499  |
| Frequencies --           | 611.8380       | 766.7110   | 801.0283  |
| Frequencies --           | 837.8918       | 868.1521   | 878.1512  |
| Frequencies --           | 923.1521       | 996.8391   | 1031.6324 |
| Frequencies --           | 1055.7248      | 1087.3464  | 1124.5693 |
| Frequencies --           | 1131.1953      | 1164.4068  | 1244.9589 |
| Frequencies --           | 1260.4297      | 1292.8402  | 1320.9786 |
| Frequencies --           | 1340.8361      | 1356.7523  | 1372.9267 |
| Frequencies --           | 1377.0765      | 1393.7215  | 1465.2861 |
| Frequencies --           | 1473.6191      | 1492.4306  | 1498.3909 |
| Frequencies --           | 1510.9004      | 2906.5456  | 2941.1544 |
| Frequencies --           | 2960.2601      | 3008.0374  | 3016.5115 |
| Frequencies --           | 3024.0460      | 3047.9900  | 3058.0281 |
| Frequencies --           | 3060.2798      | 3069.9539  | 3165.3250 |

\*\*\*\*\*

b3lyp/6-311++G\*\*

\*\*\*\*\*

b3lyp/6-311++G\*\*

\*\*\*\*\*

b3lyp/6-311++G\*\*

\*\*\*\*\*

b3lyp/6-311++G\*\*

\*\*\*\*\*

b3lyp/6-311++G\*\*

\*\*\*\*\*

b3lyp/6-311++G\*

\*

Reactants and Products structures

all structures optimized at the b3lyp/6-31g(d,p) level  
and used as input for g2mp2 calculations

\*\*\*\*\*

cyC6OO\_eq

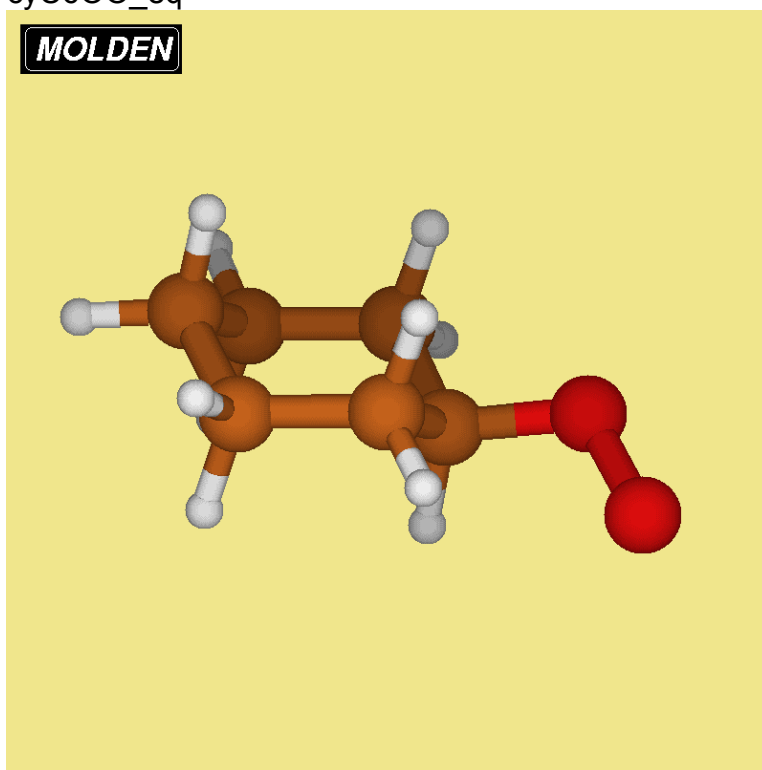

|   |           |           |           |
|---|-----------|-----------|-----------|
| C | 0.010095  | -0.004451 | 0.029601  |
| C | 0.003404  | -0.054601 | 1.555596  |
| C | 1.434176  | 0.080576  | 2.102054  |
| C | 2.367071  | -0.981874 | 1.500272  |
| C | 2.342872  | -0.943209 | -0.035588 |
| C | 0.910647  | -1.071033 | -0.585047 |
| H | -0.427157 | -1.014780 | 1.869026  |
| H | 2.049965  | -1.976872 | 1.842087  |
| H | 2.967145  | -1.742291 | -0.450159 |
| H | 0.900728  | -0.985416 | -1.676850 |

|   |           |           |           |
|---|-----------|-----------|-----------|
| H | -0.648140 | 0.736686  | 1.938432  |
| H | 0.503305  | -2.059131 | -0.334596 |
| H | 2.780035  | 0.003588  | -0.381775 |
| H | 3.390689  | -0.837811 | 1.864439  |
| H | 1.420825  | 0.005630  | 3.194961  |
| O | -1.342807 | -0.250831 | -0.487697 |
| O | -2.143229 | 0.778619  | -0.263320 |
| H | 0.288285  | 0.996383  | -0.319858 |
| H | 1.821324  | 1.081074  | 1.863888  |

ROTATIONAL CONSTANTS (GHZ)            4.04077    1.38611    1.10989

Frequencies:

|           |           |           |
|-----------|-----------|-----------|
| 83.8871   | 134.6935  | 223.8552  |
| 250.7989  | 325.0532  | 366.2790  |
| 439.9799  | 457.6906  | 505.7405  |
| 566.6995  | 799.6513  | 808.6485  |
| 850.3549  | 897.7256  | 905.2842  |
| 926.0635  | 940.5576  | 1023.1363 |
| 1049.5417 | 1067.2527 | 1090.3593 |
| 1108.5818 | 1174.9947 | 1197.0793 |
| 1218.1058 | 1274.6323 | 1288.7369 |
| 1292.0283 | 1333.0805 | 1337.3389 |
| 1372.9293 | 1387.0258 | 1388.3946 |
| 1393.2463 | 1400.2086 | 1496.9965 |
| 1500.1917 | 1503.5305 | 1509.2144 |
| 1523.6405 | 3025.5773 | 3027.2799 |
| 3032.3268 | 3040.3592 | 3043.2163 |
| 3067.5581 | 3079.6222 | 3082.4653 |
| 3086.2899 | 3096.5461 | 3107.5816 |

\*\*\*\*\*

cyC6OO\_ax

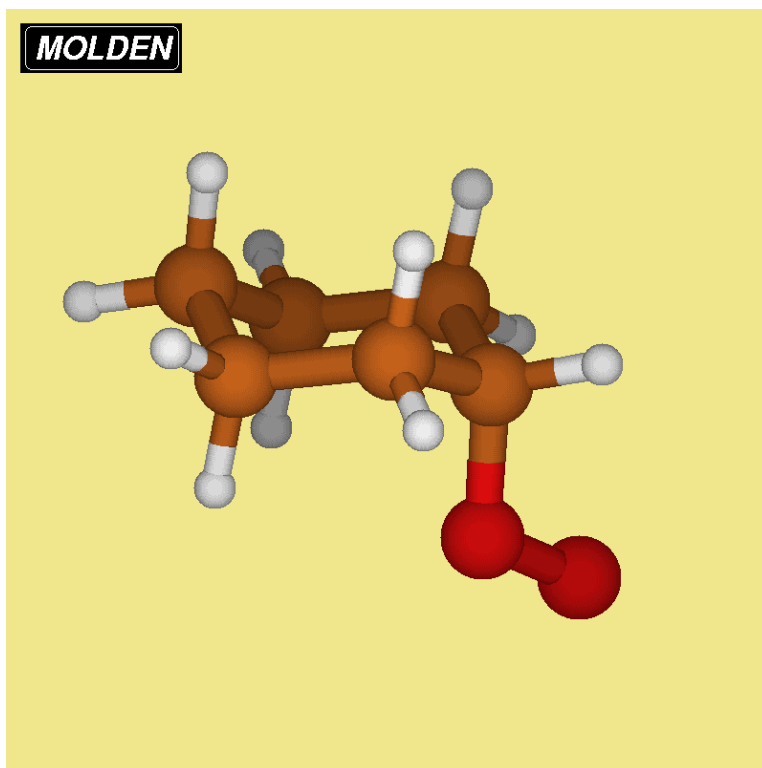

```
C 0.0713164811 -0.3429513509 -0.9643894762
C -0.0141016178 1.1819250291 -1.00769392
C -0.034001064 1.8112879914 0.395567027
C -1.1271993838 1.1886024667 1.2768235631
C -0.9691611976 -0.3370320546 1.3621400933
C -0.9569732206 -0.9829673306 -0.0318648394
H -0.9366467937 1.4402837859 -1.5439245693
H -2.1149357257 1.4301289739 0.857983185
H -1.775308789 -0.7743482383 1.9617931531
H -0.7492277191 -2.0557576762 0.0274809146
H 0.8179657285 1.5752525812 -1.6019882701
H -1.9418046889 -0.8709883258 -0.5048326048
H -0.030348097 -0.5767701645 1.8769675517
H -1.0987073538 1.6284885141 2.2802984587
H -0.1792898271 2.8940047212 0.3094154648
H 0.9437159764 1.6622187117 0.8702576126
H 0.0102568732 -0.7766060709 -1.9674202577
O 1.4374487533 -0.6498917864 -0.4883037363
O 1.7169325509 -1.9362451284 -0.6053869295
Rotational constants (GHZ): 3.29941 1.64945 1.36980
```

Frequencies:

|          |          |          |
|----------|----------|----------|
| 83.5636  | 139.4992 | 185.8637 |
| 291.8822 | 319.4698 | 375.9297 |

|           |           |           |
|-----------|-----------|-----------|
| 424.8142  | 480.0362  | 541.3621  |
| 637.1707  | 783.5741  | 804.0497  |
| 819.1485  | 872.7898  | 876.2189  |
| 908.6041  | 944.0501  | 1037.2637 |
| 1040.1254 | 1050.3218 | 1091.7548 |
| 1138.8570 | 1148.9256 | 1175.2759 |
| 1213.5543 | 1268.6248 | 1296.1720 |
| 1303.8162 | 1346.1530 | 1353.7921 |
| 1366.2109 | 1390.5614 | 1394.9365 |
| 1400.0000 | 1402.3127 | 1485.4371 |
| 1492.3763 | 1501.7323 | 1504.8555 |
| 1519.4484 | 3018.4237 | 3037.3839 |
| 3041.4541 | 3043.8070 | 3044.0998 |
| 3076.2406 | 3083.1116 | 3084.3329 |
| 3088.0658 | 3093.3260 | 3103.5336 |

\*\*\*\*\*

cyC6OOH-1\_eq

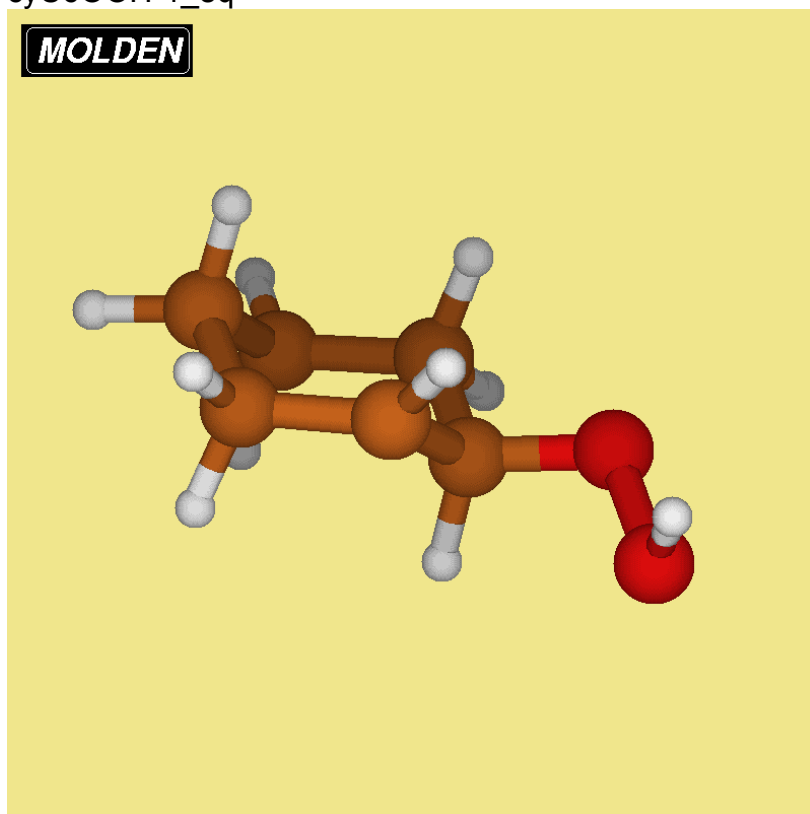

|   |         |          |          |
|---|---------|----------|----------|
| C | 0.01088 | -0.05568 | -0.08674 |
| C | 0.01495 | -0.09387 | 1.4088   |
| C | 1.34528 | 0.0391   | 2.08047  |
| C | 2.34953 | -0.99341 | 1.50186  |
| C | 2.38572 | -0.92842 | -0.03291 |

|                            |           |           |          |         |  |
|----------------------------|-----------|-----------|----------|---------|--|
| C                          | 0.99036   | -1.10619  | -0.65561 |         |  |
| H                          | -0.81848  | -0.57335  | 1.91602  |         |  |
| H                          | 2.04816   | -2.00082  | 1.81684  |         |  |
| H                          | 3.06186   | -1.69559  | -0.42725 |         |  |
| H                          | 1.02898   | -1.01333  | -1.74624 |         |  |
| H                          | 0.6       | -2.10475  | -0.42355 |         |  |
| H                          | 2.80013   | 0.04034   | -0.3455  |         |  |
| H                          | 3.3498    | -0.81554  | 1.91478  |         |  |
| H                          | 1.2575    | -0.07686  | 3.16541  |         |  |
| O                          | -1.26022  | -0.36307  | -0.66182 |         |  |
| O                          | -2.13647  | 0.77343   | -0.41201 |         |  |
| H                          | 0.32571   | 0.93845   | -0.44576 |         |  |
| H                          | 1.75732   | 1.04604   | 1.9031   |         |  |
| H                          | -2.69699  | 0.41262   | 0.29409  |         |  |
| ROTATIONAL CONSTANTS (GHZ) |           | 4.06508   | 1.35255  | 1.08959 |  |
| Frequencies:               |           |           |          |         |  |
| 83.8107                    | 106.0644  | 149.7749  |          |         |  |
| 199.5264                   | 241.4566  | 303.1064  |          |         |  |
| 345.4698                   | 366.5663  | 451.7681  |          |         |  |
| 490.5381                   | 534.2612  | 583.3375  |          |         |  |
| 802.0971                   | 839.0711  | 871.3575  |          |         |  |
| 905.8489                   | 910.4549  | 942.1348  |          |         |  |
| 974.8308                   | 1027.5326 | 1061.1206 |          |         |  |
| 1074.7318                  | 1113.9392 | 1133.4425 |          |         |  |
| 1143.5214                  | 1200.1432 | 1258.8014 |          |         |  |
| 1274.5671                  | 1307.7429 | 1328.1650 |          |         |  |
| 1341.8021                  | 1352.6838 | 1360.0594 |          |         |  |
| 1370.9671                  | 1387.5941 | 1412.0770 |          |         |  |
| 1491.8096                  | 1498.3125 | 1502.3147 |          |         |  |
| 1513.7014                  | 2977.0246 | 2986.9351 |          |         |  |
| 3025.9748                  | 3033.1957 | 3045.1317 |          |         |  |
| 3075.2377                  | 3081.0627 | 3088.6635 |          |         |  |
| 3097.3704                  | 3181.4694 | 3756.6140 |          |         |  |

\*\*\*\*\*

cyC6OOH-1\_ax



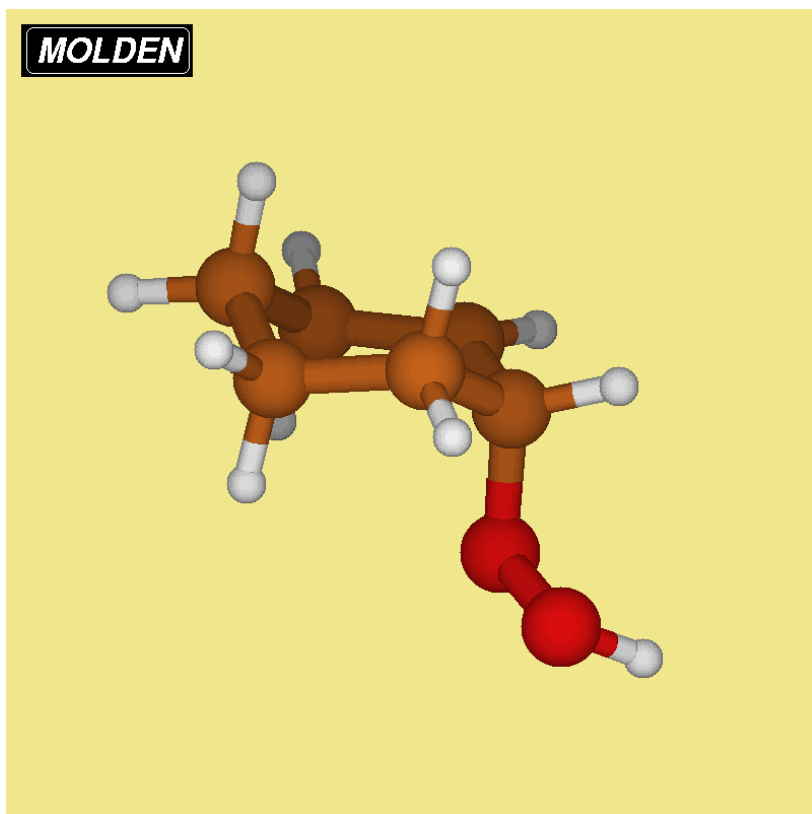

```
C 0.1886477359 1.2661334967 0.8259043744
C 0.6364127828 -0.1570865872 0.728012802
C -0.5201673055 -1.1279952068 0.4608835127
C -1.4438761249 -0.6236872136 -0.6555960058
C -2.0079001919 0.7636198626 -0.3190229736
C -0.8776495498 1.7860998992 -0.0835681286
O 1.5828508419 -0.1537229756 -0.3804675115
O 2.213541933 -1.4739241433 -0.4377386018
H -1.0907812881 -1.2397156521 1.3929916515
H -2.6227183589 0.6928833596 0.5884327117
H -1.2811754226 2.7304831296 0.3015141111
H 3.099667407 -1.246207807 -0.1119452905
H -0.1020553675 -2.1092008661 0.2180625128
H 0.8126390238 1.9658007842 1.3752043534
H -0.4228742304 2.0330878191 -1.0606308638
H -2.6664901714 1.1194025336 -1.1195316028
H -2.2608411592 -1.3367336863 -0.8152877056
H -0.8766373678 -0.5744996653 -1.5932571815
H 1.1873206566 -0.4566285043 1.6304147244
```

Frequencies:

|          |          |          |
|----------|----------|----------|
| 77.2568  | 135.7988 | 171.8288 |
| 230.9537 | 276.4140 | 291.7720 |

|           |           |           |
|-----------|-----------|-----------|
| 345.8429  | 419.6379  | 460.8119  |
| 520.1561  | 576.5942  | 669.7006  |
| 792.7425  | 813.8224  | 865.5291  |
| 875.1509  | 883.0163  | 909.8930  |
| 931.7463  | 1022.9129 | 1047.6676 |
| 1059.7889 | 1090.1600 | 1134.1560 |
| 1157.7871 | 1184.3105 | 1266.7137 |
| 1297.4654 | 1330.6480 | 1341.0062 |
| 1357.0571 | 1361.5818 | 1372.9215 |
| 1395.8744 | 1408.5868 | 1410.6110 |
| 1476.2601 | 1492.6318 | 1502.9928 |
| 1513.6829 | 2947.1412 | 3018.5077 |
| 3028.8235 | 3037.4030 | 3043.8971 |
| 3059.8089 | 3077.2169 | 3087.9118 |
| 3106.9414 | 3184.8447 | 3752.3424 |

Rotational constants (GHZ):      3.53184    1.54553    1.27750

\*\*\*\*\*

cyC6OOH-2\_eq

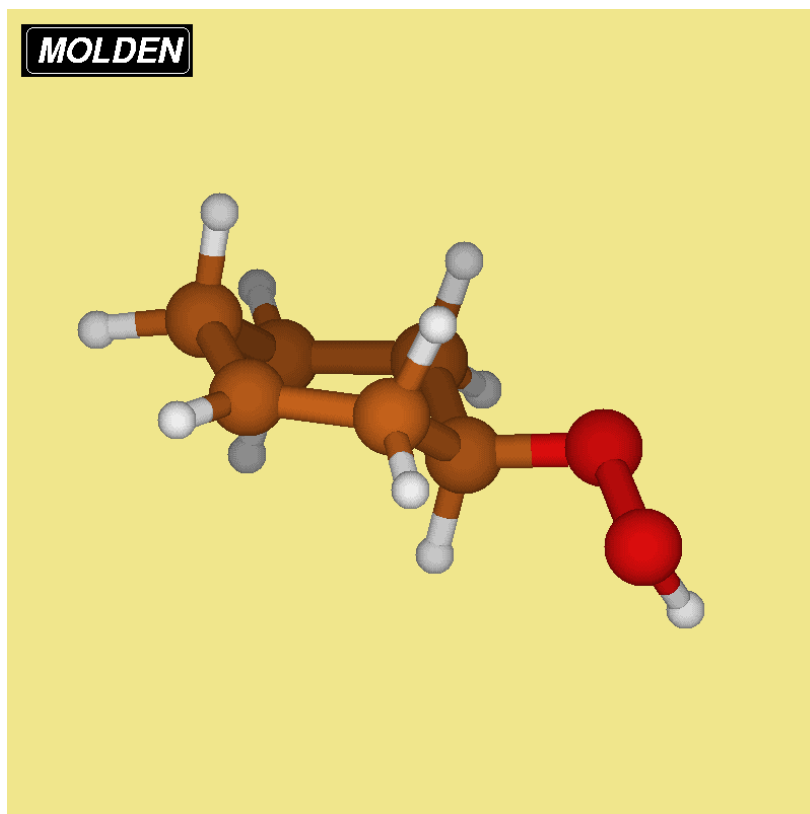

|   |          |          |          |
|---|----------|----------|----------|
| C | 0.08945  | 0.30395  | -0.13252 |
| C | -0.03619 | -0.14426 | 1.33373  |
| C | 1.20052  | 0.1778   | 2.112    |

|   |          |          |          |
|---|----------|----------|----------|
| C | 2.53534  | -0.13329 | 1.51198  |
| C | 2.60851  | 0.29336  | 0.03061  |
| C | 1.38958  | -0.20296 | -0.76315 |
| H | -0.21413 | -1.23591 | 1.31326  |
| H | 2.72549  | -1.22283 | 1.56403  |
| H | 3.52888  | -0.08588 | -0.4275  |
| H | 1.44381  | 0.12777  | -1.80598 |
| H | -0.92629 | 0.30397  | 1.78374  |
| H | 1.36827  | -1.30072 | -0.77393 |
| H | 2.65398  | 1.38851  | -0.02618 |
| H | 3.34249  | 0.33787  | 2.08448  |
| H | 1.12393  | 0.41532  | 3.16893  |
| O | -0.95674 | -0.22564 | -0.95199 |
| O | -2.21536 | 0.34537  | -0.48783 |
| H | -2.40895 | 0.94219  | -1.22918 |
| H | 0.05954  | 1.40302  | -0.18468 |

Frequencies:

|           |           |           |
|-----------|-----------|-----------|
| 103.1164  | 141.0394  | 175.5112  |
| 208.5540  | 235.9236  | 289.3816  |
| 363.0671  | 384.7608  | 460.4758  |
| 463.9463  | 507.5678  | 621.4435  |
| 797.5307  | 849.3771  | 865.2122  |
| 899.7235  | 923.7782  | 935.8344  |
| 962.4589  | 1042.5850 | 1052.8033 |
| 1091.6371 | 1101.5708 | 1118.9210 |
| 1139.1716 | 1227.8364 | 1249.5737 |
| 1281.1827 | 1310.1387 | 1333.3806 |
| 1357.3201 | 1360.0658 | 1369.6264 |
| 1393.1380 | 1394.2219 | 1406.9988 |
| 1481.1083 | 1485.6856 | 1505.2074 |
| 1514.8223 | 2925.7098 | 2941.6344 |
| 3004.9006 | 3036.3293 | 3039.9916 |
| 3069.8442 | 3082.6174 | 3092.1376 |
| 3103.8655 | 3189.4564 | 3752.6845 |

ROTATIONAL CONSTANTS (GHZ)      4.12575    1.35982    1.09116

\*\*\*\*\*

cyC6OOH-2\_ax

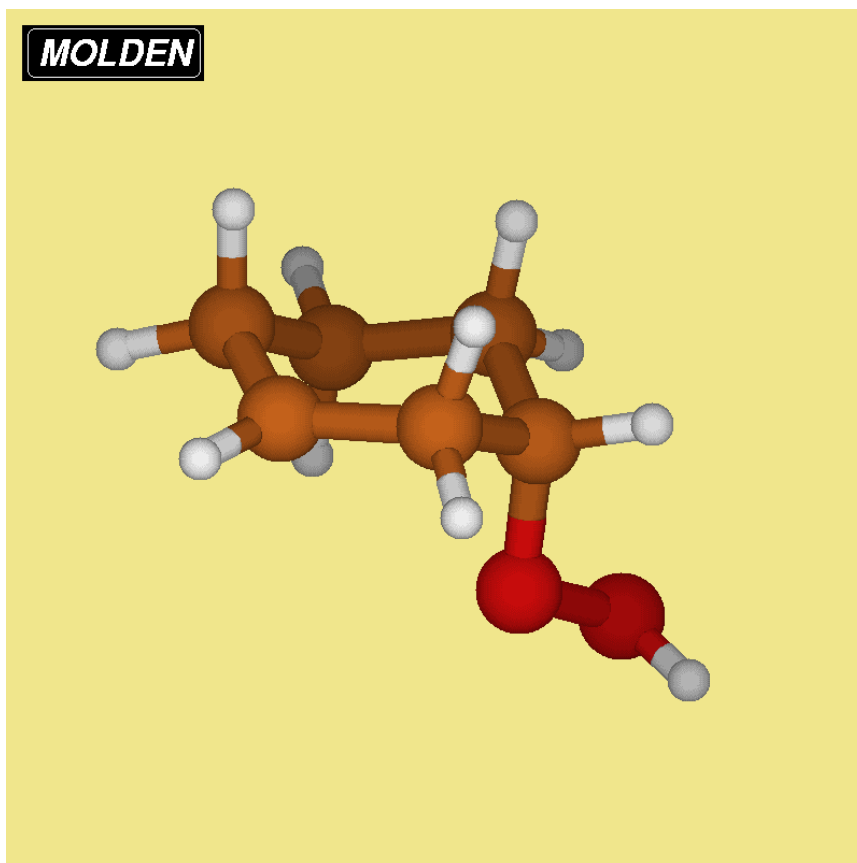

|   |           |           |           |
|---|-----------|-----------|-----------|
| C | -0.063256 | -0.992532 | 0.884123  |
| C | -0.628235 | 0.410727  | 0.635002  |
| C | 0.487331  | 1.457633  | 0.454725  |
| C | 1.575996  | 0.998106  | -0.462545 |
| C | 2.075777  | -0.407403 | -0.360687 |
| C | 0.917915  | -1.416702 | -0.216890 |
| O | -1.381395 | 0.474998  | -0.587111 |
| O | -2.543404 | -0.390797 | -0.433989 |
| H | 0.887945  | 1.656371  | 1.467119  |
| H | 2.734696  | -0.510004 | 0.524411  |
| H | 1.313104  | -2.416145 | -0.002357 |
| H | -0.894319 | -1.700123 | 0.956685  |
| H | 0.047484  | 2.401178  | 0.113187  |
| H | 0.440365  | -0.987144 | 1.861275  |
| H | 0.374786  | -1.479671 | -1.165756 |
| H | 2.700293  | -0.659999 | -1.225391 |
| H | 2.133362  | 1.734915  | -1.032977 |
| H | -1.288753 | 0.707330  | 1.462582  |
| H | -3.243743 | 0.280707  | -0.392339 |

Frequencies:

|          |          |          |
|----------|----------|----------|
| 89.2396  | 135.6677 | 156.6029 |
| 202.1137 | 260.2735 | 296.5470 |

|           |           |           |
|-----------|-----------|-----------|
| 333.9506  | 371.0678  | 421.7342  |
| 517.4436  | 566.2373  | 688.3942  |
| 804.2898  | 821.3907  | 858.6234  |
| 875.4886  | 885.9932  | 941.8228  |
| 967.9399  | 1012.2724 | 1042.5753 |
| 1067.3094 | 1108.5034 | 1124.1968 |
| 1146.9328 | 1196.6274 | 1255.8220 |
| 1281.7878 | 1334.0749 | 1346.6796 |
| 1358.5240 | 1363.9345 | 1373.4888 |
| 1389.4420 | 1407.0884 | 1414.7051 |
| 1466.8675 | 1480.1096 | 1496.3765 |
| 1508.8624 | 2912.0402 | 2930.1312 |
| 3012.7461 | 3032.0690 | 3050.8914 |
| 3068.0205 | 3076.6539 | 3097.7914 |
| 3105.7114 | 3191.2423 | 3754.1489 |

Rotational constants (GHZ):      3.34233    1.62251    1.34121

\*\*\*\*\*

cyC6OOH-3\_eq

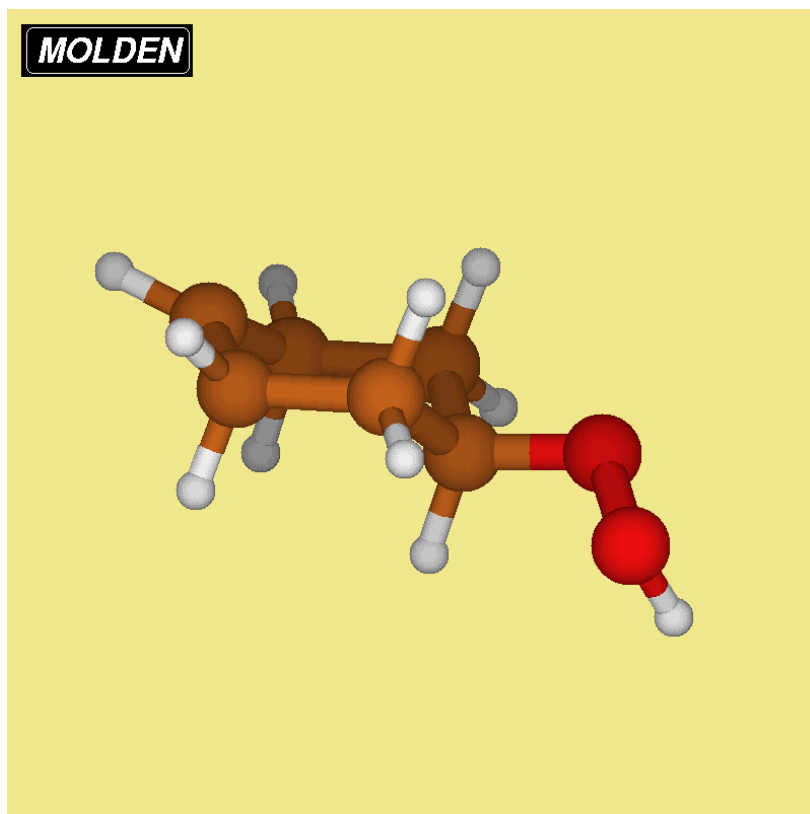

|   |          |         |         |
|---|----------|---------|---------|
| C | 0.05044  | 0.07747 | 0.04034 |
| C | -0.05841 | 1.60317 | 0.05277 |
| C | 0.07585  | 2.15179 | 1.4889  |

|   |          |          |          |
|---|----------|----------|----------|
| C | -0.81388 | 1.4313   | 2.4524   |
| C | -0.92244 | -0.05904 | 2.37176  |
| C | -1.02921 | -0.5638  | 0.91642  |
| H | -1.0364  | 1.8761   | -0.36165 |
| H | -1.77783 | -0.42141 | 2.95344  |
| H | -0.94042 | -1.65464 | 0.87877  |
| H | 0.70726  | 2.03243  | -0.59921 |
| H | -2.00977 | -0.29988 | 0.50319  |
| H | -0.03138 | -0.52674 | 2.83386  |
| H | -1.1576  | 1.94101  | 3.34838  |
| H | -0.12622 | 3.22892  | 1.50088  |
| O | -0.15683 | -0.47273 | -1.26517 |
| O | 0.93454  | -0.01715 | -2.11822 |
| H | 1.04786  | -0.22814 | 0.39727  |
| H | 1.1326   | 2.04733  | 1.80381  |
| H | 1.41152  | -0.85505 | -2.23477 |

Frequencies:

|           |           |           |
|-----------|-----------|-----------|
| 104.3744  | 137.6049  | 202.9796  |
| 207.5152  | 212.8176  | 274.2279  |
| 367.6500  | 395.4559  | 443.8512  |
| 477.8667  | 516.0581  | 648.2319  |
| 782.9425  | 819.4199  | 874.8810  |
| 906.3512  | 929.3165  | 951.3241  |
| 965.2785  | 1023.6386 | 1064.3918 |
| 1084.5887 | 1104.7870 | 1116.6588 |
| 1143.3261 | 1219.3166 | 1251.4883 |
| 1285.3965 | 1315.3822 | 1330.8690 |
| 1345.7908 | 1360.2364 | 1372.4159 |
| 1393.9688 | 1398.1784 | 1414.3665 |
| 1478.9519 | 1485.2531 | 1501.4633 |
| 1519.1515 | 2919.3069 | 2924.1528 |
| 2984.4903 | 3049.4968 | 3053.9121 |
| 3068.6851 | 3070.0281 | 3099.0079 |
| 3114.8280 | 3183.3589 | 3753.7323 |

ROTATIONAL CONSTANTS (GHZ)      3.96037    1.39011    1.09843

\*\*\*\*\*

cyC6OOH-3\_ax

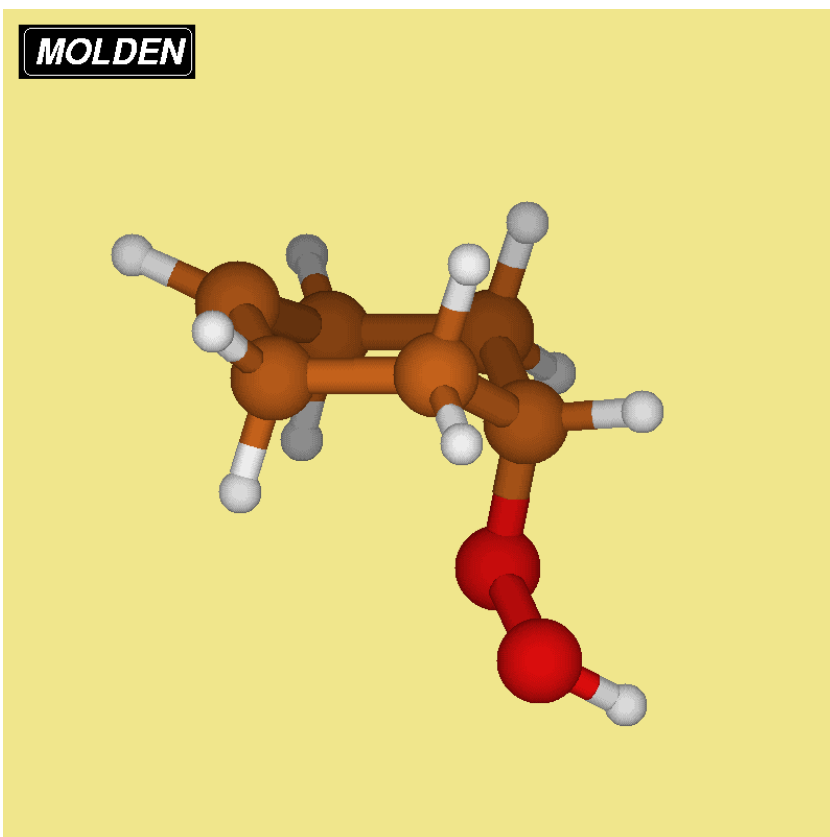

|   |           |           |           |
|---|-----------|-----------|-----------|
| C | 1.398072  | -0.205930 | -0.765909 |
| C | 0.046428  | 0.148975  | -0.133170 |
| C | -0.018861 | -0.259379 | 1.342015  |
| C | 1.146518  | 0.335274  | 2.158483  |
| C | 2.469328  | 0.111950  | 1.495820  |
| C | 2.593178  | 0.366947  | 0.026481  |
| O | -0.074197 | 1.570930  | -0.307893 |
| O | -1.389656 | 1.971582  | 0.171432  |
| H | 0.017474  | -1.355542 | 1.385570  |
| H | 3.529495  | -0.046844 | -0.366133 |
| H | 1.420691  | 0.144658  | -1.803457 |
| H | -0.980535 | 0.051598  | 1.759777  |
| H | 1.463858  | -1.300260 | -0.790659 |
| H | 2.639598  | 1.454276  | -0.162755 |
| H | 3.369185  | 0.051254  | 2.102214  |
| H | 1.141167  | -0.077462 | 3.173825  |
| H | -0.766210 | -0.337996 | -0.692718 |
| H | -1.818304 | 2.176934  | -0.675594 |
| H | 0.961115  | 1.418588  | 2.268990  |

Frequencies:

|          |          |          |
|----------|----------|----------|
| 88.3245  | 144.3389 | 169.4909 |
| 208.6876 | 237.9706 | 297.8311 |

|           |           |           |
|-----------|-----------|-----------|
| 363.2858  | 388.9173  | 416.1052  |
| 535.2021  | 573.9932  | 684.5233  |
| 768.8164  | 812.4448  | 862.4283  |
| 880.6214  | 915.1802  | 953.5929  |
| 959.0247  | 1015.0098 | 1034.4207 |
| 1070.5799 | 1102.9224 | 1127.9629 |
| 1161.7358 | 1193.2994 | 1235.8631 |
| 1303.3207 | 1333.6762 | 1344.4589 |
| 1355.5927 | 1357.7229 | 1375.2654 |
| 1395.3040 | 1402.8441 | 1411.4721 |
| 1476.7342 | 1485.7459 | 1488.2925 |
| 1501.7061 | 2954.2705 | 2958.8036 |
| 3005.3765 | 3042.5954 | 3049.9698 |
| 3064.7012 | 3068.7143 | 3093.3424 |
| 3108.7294 | 3179.4172 | 3751.4622 |

Rotational constants (GHZ):      3.21070    1.67096    1.38122

\*\*\*\*\*

cyC6O\_OH-2\_ax

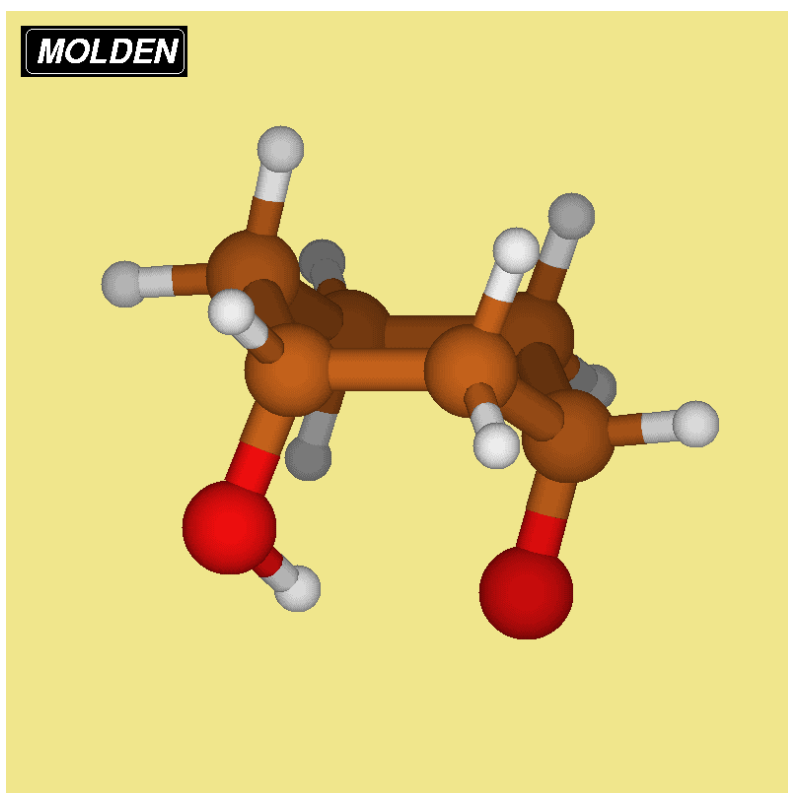

C 0.3309850294 -0.637615141 -1.5681843931  
C -1.015581517 -0.1304877199 -1.0054763332  
C -1.1847648047 -0.6133614501 0.4924289986



C 0.0066619117 -0.1756834079 1.3551208525  
C 1.3418056745 -0.6543985392 0.7577500496  
C 1.5183964493 -0.2051800372 -0.7001505752  
O -1.0900883699 1.2339500243 -0.948226886  
O -0.0118868864 1.2268030149 1.5793113417  
H -1.2732704079 -1.705663532 0.4537975322  
H 1.3806224659 -1.7515643017 0.812808821  
H 2.4488387035 -0.6119513652 -1.1108143069  
H 0.4420631428 -0.2694495036 -2.5940230841  
H -2.1132493068 -0.2028491207 0.8966619985  
H 0.2776565165 -1.7334170769 -1.6266516483  
H 1.6129738388 0.8859731186 -0.7381739761  
H 2.1565640704 -0.2708954724 1.380379827  
H -0.1161252709 -0.627279382 2.3485228173  
H -1.8659757869 -0.5515246184 -1.5714719243  
H -0.1193123749 1.6529547129 0.7113567035

Frequencies:

|           |           |           |
|-----------|-----------|-----------|
| 139.3782  | 182.7068  | 270.4634  |
| 324.5616  | 358.3231  | 390.0230  |
| 422.1200  | 481.4062  | 516.1276  |
| 592.2770  | 699.5093  | 745.0548  |
| 814.0849  | 840.4079  | 857.2853  |
| 888.2360  | 934.9684  | 982.7706  |
| 1002.2902 | 1018.0052 | 1066.7266 |
| 1073.2590 | 1098.5739 | 1139.5994 |
| 1177.1680 | 1233.0502 | 1262.7283 |
| 1275.2497 | 1289.4418 | 1322.5510 |
| 1346.4667 | 1357.7140 | 1378.6541 |
| 1396.5629 | 1415.8851 | 1440.9119 |
| 1474.3993 | 1488.1827 | 1500.9989 |
| 1511.5371 | 2950.8108 | 3023.1380 |
| 3032.0024 | 3038.6171 | 3055.6242 |
| 3059.4536 | 3085.8499 | 3092.1970 |
| 3098.7361 | 3127.1436 | 3688.3861 |

Rotational constants (GHZ): 2.57542 2.27348 1.69121

\*\*\*\*\*

epoxyxyC6-1

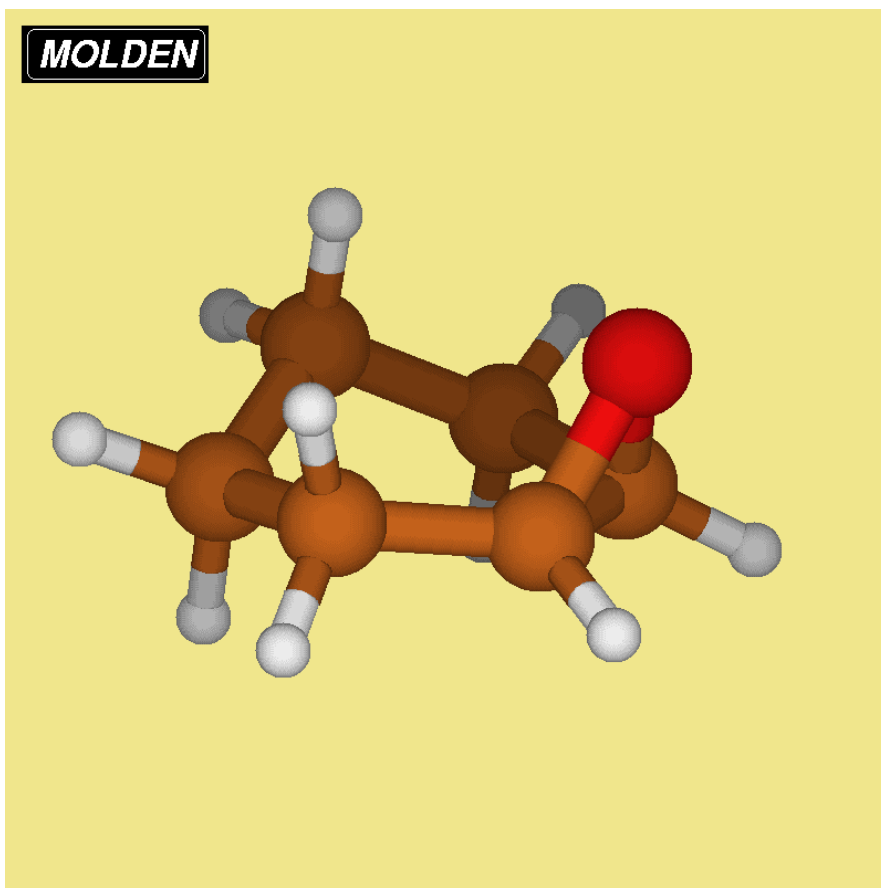

|   |          |          |         |
|---|----------|----------|---------|
| C | 0.80975  | 0.99417  | 1.90079 |
| C | 1.07209  | 0.80327  | 3.34135 |
| O | 0.45169  | 2.00593  | 2.86388 |
| C | 1.92137  | 1.36226  | 0.93072 |
| C | 2.47027  | 0.95022  | 3.90247 |
| C | 3.3289   | 1.2483   | 1.54436 |
| C | 3.37901  | 1.77998  | 2.98291 |
| H | -0.05637 | 0.49051  | 1.46717 |
| H | 0.40134  | 0.15196  | 3.90688 |
| H | 1.84862  | 0.72374  | 0.04241 |
| H | 1.73708  | 2.38956  | 0.59188 |
| H | 2.41385  | 1.39995  | 4.90178 |
| H | 2.89057  | -0.05685 | 4.03472 |
| H | 3.6373   | 0.19361  | 1.54889 |
| H | 4.0499   | 1.77862  | 0.91214 |
| H | 3.05453  | 2.82664  | 3.00278 |
| H | 4.4064   | 1.75414  | 3.36267 |

Frequencies:

|          |          |          |
|----------|----------|----------|
| 145.3403 | 271.4111 | 356.5468 |
| 373.9955 | 441.7841 | 543.9893 |
| 648.4661 | 775.8320 | 787.8321 |

|           |           |           |
|-----------|-----------|-----------|
| 830.3086  | 851.7892  | 897.7471  |
| 906.7088  | 990.2551  | 1008.3653 |
| 1044.5515 | 1057.1959 | 1081.5638 |
| 1102.0913 | 1167.6417 | 1198.7304 |
| 1218.7313 | 1279.8129 | 1293.5352 |
| 1308.6521 | 1359.2881 | 1381.0137 |
| 1387.6181 | 1396.8055 | 1407.2095 |
| 1476.2569 | 1492.7049 | 1496.2942 |
| 1502.1422 | 1514.0707 | 3023.8173 |
| 3025.6937 | 3039.6952 | 3049.6628 |
| 3066.8727 | 3074.4884 | 3084.0230 |
| 3096.1548 | 3097.3743 | 3112.6995 |

ROTATIONAL CONSTANTS (GHZ)      3.84853    3.14532    2.09697

\*\*\*\*\*

epoxyxyC6-2

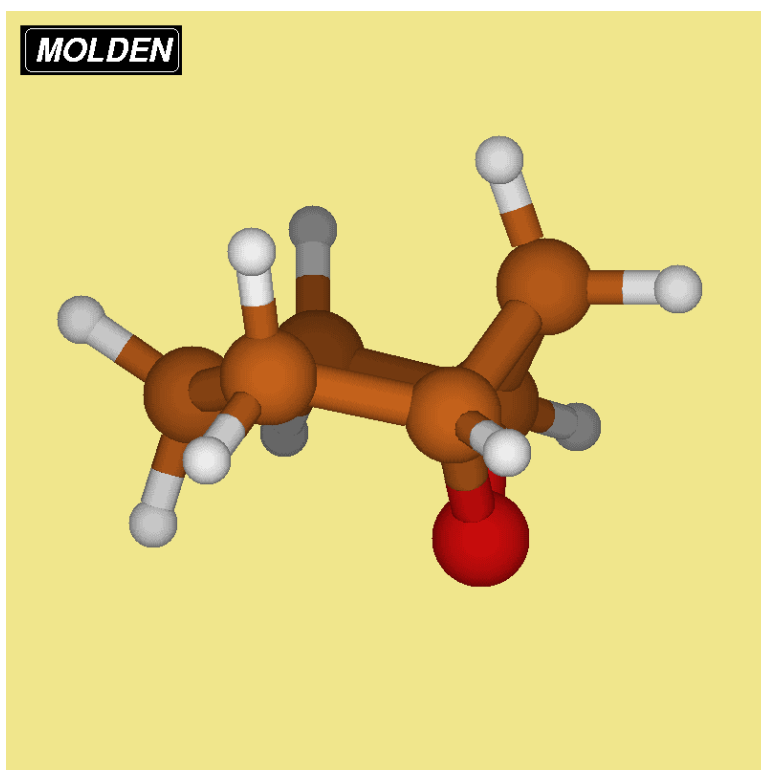

|   |         |          |          |
|---|---------|----------|----------|
| C | 0.16331 | 0.02246  | -0.12621 |
| C | -0.1068 | -0.54918 | 1.27782  |
| C | 0.83084 | 0.59851  | 1.69558  |
| C | 2.30304 | 0.17262  | 1.60489  |
| C | 2.66201 | -0.09197 | 0.119    |
| C | 1.44929 | -0.56506 | -0.72495 |

|   |          |          |          |
|---|----------|----------|----------|
| H | 0.20083  | -1.5776  | 1.49032  |
| H | 2.45763  | -0.717   | 2.22865  |
| H | 3.49471  | -0.79752 | 0.03721  |
| H | 1.57722  | -0.23776 | -1.76256 |
| H | -1.13637 | -0.38377 | 1.60293  |
| H | 1.36684  | -1.65929 | -0.74598 |
| H | 3.00857  | 0.85268  | -0.30695 |
| H | 2.95666  | 0.956    | 2.004    |
| H | 0.59432  | 1.17212  | 2.59711  |
| H | -0.66459 | 0.0855   | -0.83917 |
| O | 0.46879  | 1.3241   | 0.47454  |

Frequencies:

|           |           |           |
|-----------|-----------|-----------|
| 146.4297  | 296.4960  | 395.4158  |
| 427.4851  | 543.7642  | 620.9653  |
| 760.3827  | 813.2850  | 827.6413  |
| 857.5641  | 875.4448  | 922.3557  |
| 937.7176  | 957.6162  | 987.2909  |
| 1028.4379 | 1037.8977 | 1092.9090 |
| 1121.3859 | 1125.4911 | 1158.9554 |
| 1232.9274 | 1242.5893 | 1266.1967 |
| 1273.7762 | 1336.9437 | 1339.0366 |
| 1353.4684 | 1359.4092 | 1386.4271 |
| 1388.2319 | 1492.5631 | 1503.6831 |
| 1505.1876 | 1521.7001 | 3038.9777 |
| 3039.7766 | 3067.7290 | 3070.5322 |
| 3078.3984 | 3080.1039 | 3087.2257 |
| 3089.3695 | 3117.5325 | 3135.6242 |

ROTATIONAL CONSTANTS (GHZ)      3.93460    3.30710    2.56156

\*\*\*\*\*

epoxyxyC6-3

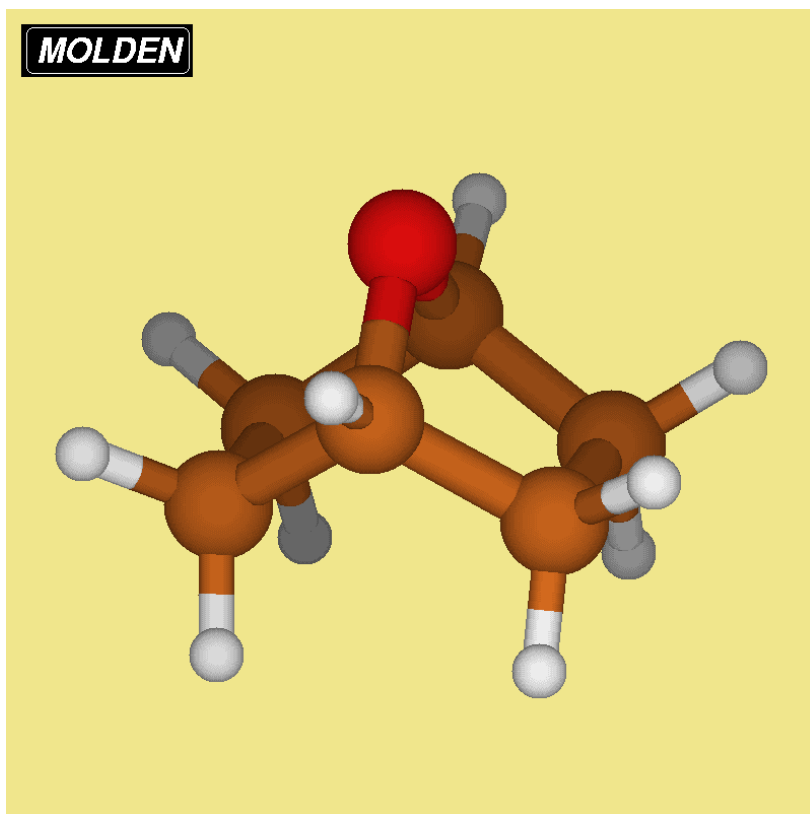

|   |          |          |          |
|---|----------|----------|----------|
| C | 0.52848  | 0.2762   | 0.00807  |
| C | 1.34795  | 1.32707  | 0.79139  |
| C | 0.20884  | 2.14029  | 1.4797   |
| C | -1.04226 | 1.39821  | 0.95579  |
| C | -1.18525 | 0.03257  | 1.66625  |
| C | -0.04466 | -0.7806  | 0.97998  |
| H | 1.92397  | 1.95394  | 0.10565  |
| H | -2.16502 | -0.40636 | 1.46042  |
| H | 0.70455  | -1.15378 | 1.68433  |
| H | 2.04579  | 0.87312  | 1.50122  |
| H | -0.44373 | -1.63518 | 0.42733  |
| H | -1.0698  | 0.10854  | 2.75145  |
| H | -1.95337 | 1.99662  | 0.90614  |
| H | 0.20601  | 3.1809   | 1.14479  |
| O | -0.6451  | 1.01767  | -0.37565 |
| H | 1.01409  | -0.1244  | -0.88331 |
| H | 0.27403  | 2.1371   | 2.57177  |

Frequencies:

|          |          |          |
|----------|----------|----------|
| 140.6553 | 318.3479 | 394.7762 |
| 550.9903 | 583.9450 | 764.3822 |
| 801.4982 | 813.0192 | 832.6873 |
| 836.7062 | 891.7509 | 917.6284 |
| 935.5187 | 959.9029 | 983.4981 |

|           |           |           |
|-----------|-----------|-----------|
| 1014.1186 | 1026.1552 | 1029.1997 |
| 1100.6638 | 1128.4932 | 1182.2585 |
| 1229.5816 | 1235.8892 | 1236.8373 |
| 1281.8252 | 1301.7880 | 1305.7017 |
| 1316.2345 | 1339.9109 | 1355.5935 |
| 1367.5734 | 1489.7115 | 1502.0622 |
| 1511.2373 | 1526.8134 | 3065.8556 |
| 3069.1513 | 3075.0029 | 3078.7540 |
| 3107.4439 | 3110.5072 | 3124.2842 |
| 3128.3103 | 3129.0551 | 3135.4836 |

ROTATIONAL CONSTANTS (GHZ)      3.92197    3.28492    2.83085

\*\*\*\*\*

cyC6H10

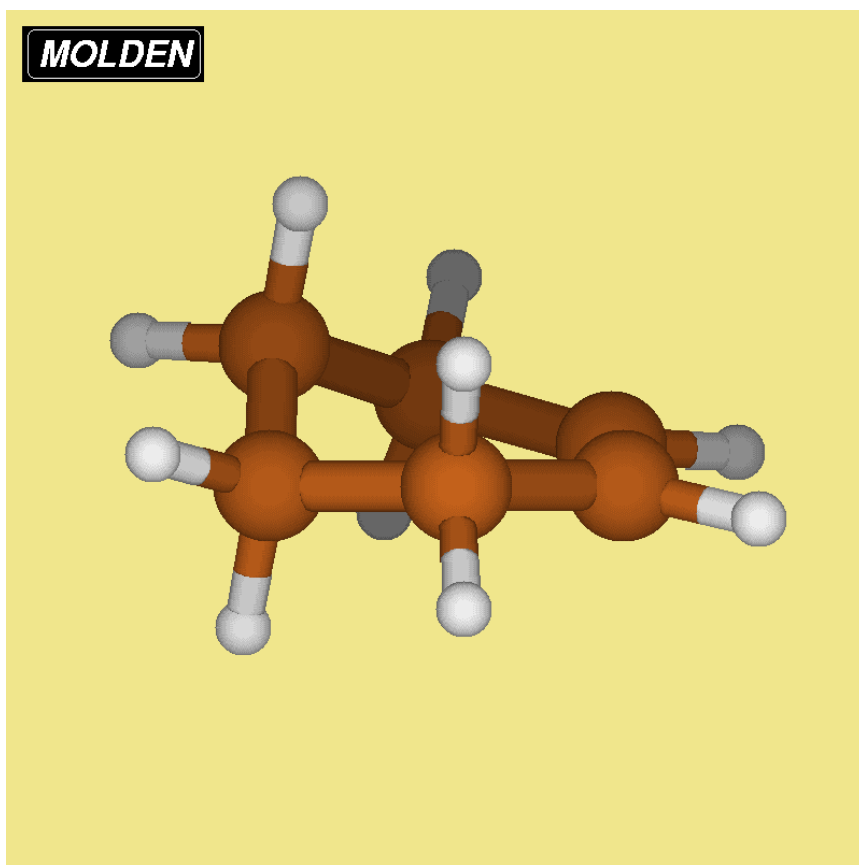

|   |          |         |          |
|---|----------|---------|----------|
| C | 0.58502  | 1.19876 | -0.69304 |
| C | 0.89814  | 0.79486 | 0.75642  |
| H | 1.50518  | 1.50724 | -1.20674 |
| H | -0.06681 | 2.08616 | -0.70513 |
| C | -0.28681 | 0.05094 | 1.38773  |
| H | 1.77842  | 0.13832 | 0.76505  |

|   |          |          |          |
|---|----------|----------|----------|
| H | 1.15962  | 1.67965  | 1.34806  |
| H | -0.07999 | -0.18624 | 2.4376   |
| H | -1.16708 | 0.7075   | 1.38032  |
| C | -0.60929 | -1.2329  | 0.60681  |
| C | -0.59353 | -1.00753 | -0.88546 |
| H | -1.58919 | -1.62418 | 0.91105  |
| H | 0.11256  | -2.02339 | 0.86482  |
| C | -0.07631 | 0.08148  | -1.46267 |
| H | -1.03488 | -1.78435 | -1.50807 |
| H | -0.12115 | 0.18565  | -2.54573 |

Frequencies:

|           |           |           |
|-----------|-----------|-----------|
| 165.8955  | 279.5317  | 397.5154  |
| 457.2065  | 501.7144  | 655.4996  |
| 732.8075  | 826.0442  | 831.4504  |
| 885.8279  | 913.7535  | 939.1310  |
| 1002.1684 | 1020.0256 | 1051.1760 |
| 1075.8183 | 1100.1677 | 1165.4276 |
| 1165.4519 | 1253.7169 | 1274.5453 |
| 1297.8746 | 1357.1976 | 1380.7301 |
| 1383.2987 | 1393.2327 | 1429.1919 |
| 1486.8259 | 1493.0084 | 1505.4502 |
| 1515.7206 | 1734.4194 | 3002.6933 |
| 3002.9181 | 3028.4729 | 3031.5171 |
| 3048.2491 | 3048.7440 | 3076.6678 |
| 3081.9539 | 3144.6328 | 3168.1389 |

ROTATIONAL CONSTANTS (GHZ)      4.71660    4.52862    2.54250

\*\*\*\*\*

1-Hexen-3one C6H10O

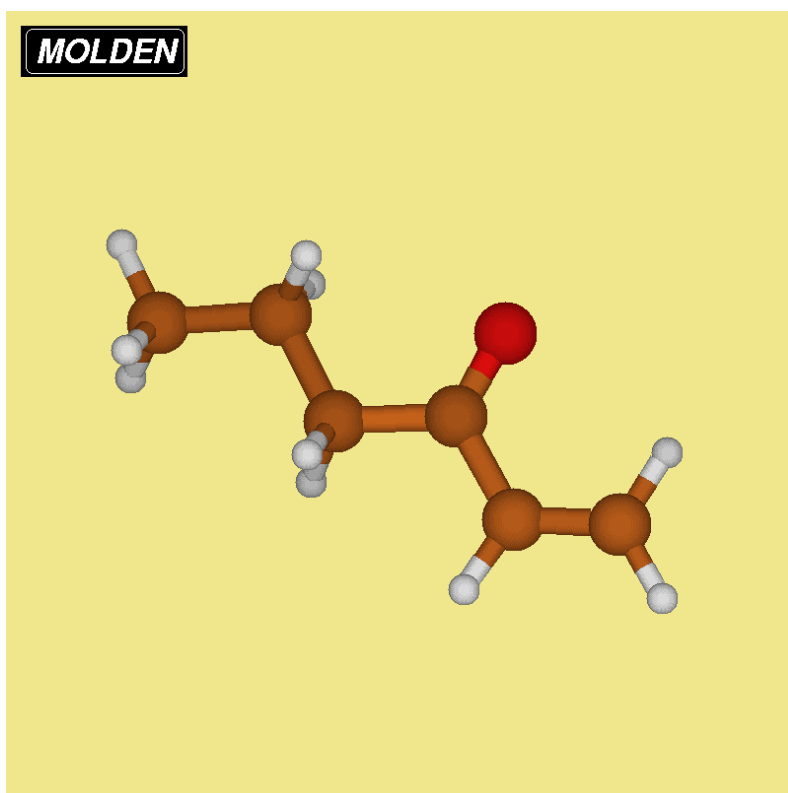

|   |          |          |          |
|---|----------|----------|----------|
| C | -1.36901 | 0.35864  | -2.88178 |
| C | -1.30804 | 0.14984  | -1.36651 |
| H | -2.40441 | 0.37625  | -3.23615 |
| H | -0.90271 | 1.30637  | -3.17503 |
| H | -0.84921 | -0.44359 | -3.41832 |
| C | 0.12213  | 0.1182   | -0.83004 |
| H | -1.86227 | 0.94297  | -0.85263 |
| H | -1.8105  | -0.78445 | -1.09277 |
| H | 0.70814  | -0.67759 | -1.31563 |
| H | 0.6567   | 1.04873  | -1.07674 |
| C | 0.21929  | -0.08709 | 0.67442  |
| C | 1.60138  | -0.12493 | 1.24673  |
| C | 1.80732  | -0.29913 | 2.55477  |
| O | -0.77151 | -0.21395 | 1.37718  |
| H | 2.43482  | -0.00501 | 0.55743  |
| H | 2.80383  | -0.32849 | 2.9837   |
| H | 0.95928  | -0.41682 | 3.22322  |

Frequencies:

|          |          |          |
|----------|----------|----------|
| 62.0545  | 72.0906  | 131.8819 |
| 145.2958 | 247.1148 | 297.7143 |
| 334.3043 | 422.5034 | 463.0646 |
| 652.9325 | 660.2671 | 759.7966 |
| 841.4715 | 893.8908 | 912.4248 |



|           |           |           |
|-----------|-----------|-----------|
| 999.9260  | 1032.3530 | 1050.4013 |
| 1066.0734 | 1089.5147 | 1108.1905 |
| 1150.6684 | 1252.4958 | 1316.5821 |
| 1326.7888 | 1336.8922 | 1406.8808 |
| 1429.2993 | 1443.0492 | 1465.7528 |
| 1501.5623 | 1514.7131 | 1521.5329 |
| 1688.2818 | 1789.8380 | 3006.9589 |
| 3033.8785 | 3036.2823 | 3059.4529 |
| 3086.0023 | 3109.9212 | 3113.7750 |
| 3160.3769 | 3174.4882 | 3257.9171 |

ROTATIONAL CONSTANTS (GHZ)      8.28362   1.18642   1.05794

\*\*\*\*\*

5-hexenal

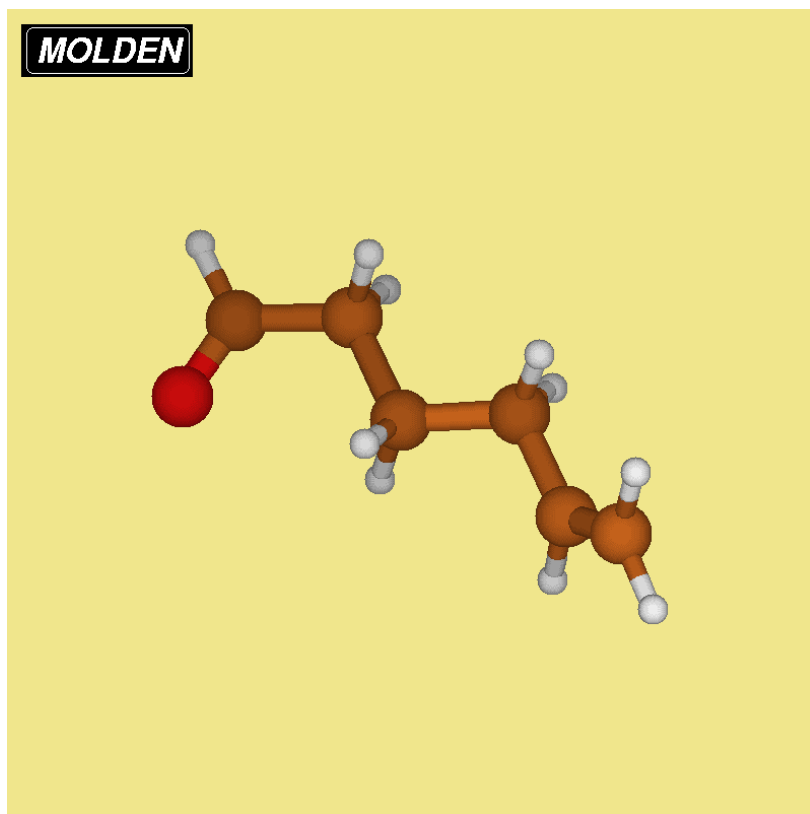

|   |          |          |          |
|---|----------|----------|----------|
| C | -1.35724 | 0.09065  | -2.31543 |
| C | -1.35051 | 0.18386  | -0.80731 |
| H | -2.36897 | 0.14264  | -2.77985 |
| C | 0.03889  | 0.09554  | -0.17697 |
| H | -1.85625 | 1.12492  | -0.53883 |
| H | -2.01757 | -0.60667 | -0.42926 |
| H | 0.5067   | -0.85345 | -0.46009 |

|   |          |          |          |
|---|----------|----------|----------|
| H | 0.67503  | 0.88006  | -0.60316 |
| C | 0.00728  | 0.22131  | 1.35674  |
| C | 1.37919  | 0.17593  | 1.97228  |
| C | 1.79606  | -0.72857 | 2.85782  |
| H | 2.07206  | 0.95142  | 1.64196  |
| H | 2.80347  | -0.7105  | 3.26268  |
| H | 1.14233  | -1.52148 | 3.21417  |
| H | -0.61473 | -0.57497 | 1.78533  |
| H | -0.47806 | 1.17293  | 1.62247  |
| O | -0.36826 | -0.02966 | -3.00478 |

Frequencies:

|           |           |           |
|-----------|-----------|-----------|
| 55.6834   | 87.2113   | 102.4442  |
| 149.1188  | 179.1971  | 268.1856  |
| 355.6361  | 436.8084  | 632.5266  |
| 673.6778  | 715.8395  | 778.1630  |
| 892.4272  | 921.4460  | 943.1882  |
| 952.5705  | 1030.4703 | 1044.3744 |
| 1048.1223 | 1086.5010 | 1162.7724 |
| 1217.6085 | 1266.3857 | 1297.8565 |
| 1323.2582 | 1333.6791 | 1361.2783 |
| 1405.9152 | 1428.5341 | 1461.8977 |
| 1466.2956 | 1494.4691 | 1512.5232 |
| 1730.8776 | 1831.0223 | 2882.9617 |
| 3004.7086 | 3008.7359 | 3033.3095 |
| 3054.4687 | 3060.0944 | 3101.5166 |
| 3135.5337 | 3150.2853 | 3234.0803 |

ROTATIONAL CONSTANTS (GHZ)      8.49883    0.95712    0.90071

\*\*\*\*\*

cyC6H11O2H - cyclohexyl-hydroperoxide

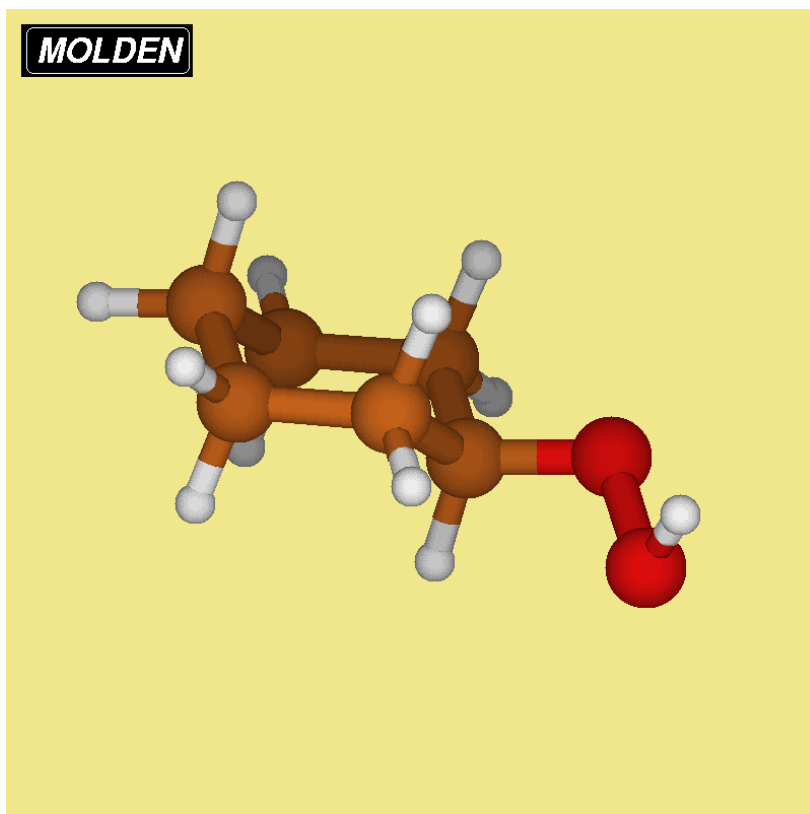

|   |          |          |          |
|---|----------|----------|----------|
| c | 0.0136   | -0.01905 | -0.06737 |
| c | -0.04344 | -0.05816 | 1.46275  |
| c | 1.36057  | 0.09052  | 2.07068  |
| c | 2.32381  | -0.97148 | 1.5192   |
| c | 2.36203  | -0.94813 | -0.0167  |
| c | 0.95617  | -1.08974 | -0.62432 |
| h | -0.48015 | -1.02029 | 1.76532  |
| h | 1.99733  | -1.96495 | 1.85732  |
| h | 3.00892  | -1.74753 | -0.39558 |
| h | 0.99057  | -1.0145  | -1.71608 |
| h | -0.709   | 0.73248  | 1.8237   |
| h | 0.54412  | -2.07828 | -0.38218 |
| h | 2.80785  | -0.00197 | -0.35346 |
| h | 3.33095  | -0.81898 | 1.92457  |
| h | 1.30421  | 0.02681  | 3.16339  |
| o | -1.25547 | -0.28737 | -0.6737  |
| o | -2.12574 | 0.84872  | -0.38937 |
| h | 0.35058  | 0.97437  | -0.39851 |
| h | 1.75232  | 1.09088  | 1.83882  |
| h | -2.7842  | 0.4182   | 0.1792   |

Frequencies:

|          |          |          |
|----------|----------|----------|
| 103.2822 | 148.3736 | 223.0139 |
| 232.7253 | 244.7188 | 330.6099 |
| 368.6200 | 439.4947 | 467.9445 |

|           |           |           |
|-----------|-----------|-----------|
| 490.4781  | 559.9673  | 799.1703  |
| 806.6048  | 849.6602  | 897.4066  |
| 899.8201  | 929.1092  | 944.2932  |
| 976.1837  | 1031.4448 | 1065.0490 |
| 1080.5066 | 1093.0271 | 1108.5034 |
| 1179.0589 | 1210.8652 | 1275.6784 |
| 1284.7211 | 1290.5721 | 1331.0174 |
| 1341.9045 | 1362.0335 | 1372.9134 |
| 1387.3524 | 1388.7305 | 1398.1679 |
| 1408.4227 | 1497.6972 | 1499.1025 |
| 1504.2399 | 1509.2065 | 1523.8777 |
| 3013.6058 | 3022.9944 | 3024.5277 |
| 3028.8688 | 3031.2127 | 3040.9370 |
| 3074.4493 | 3076.5584 | 3081.7589 |
| 3094.3851 | 3097.3004 | 3764.6036 |

ROTATIONAL CONSTANTS (GHZ)      3.94115    1.35062    1.08239

\*\*\*\*\*

cyclo-Hexanone

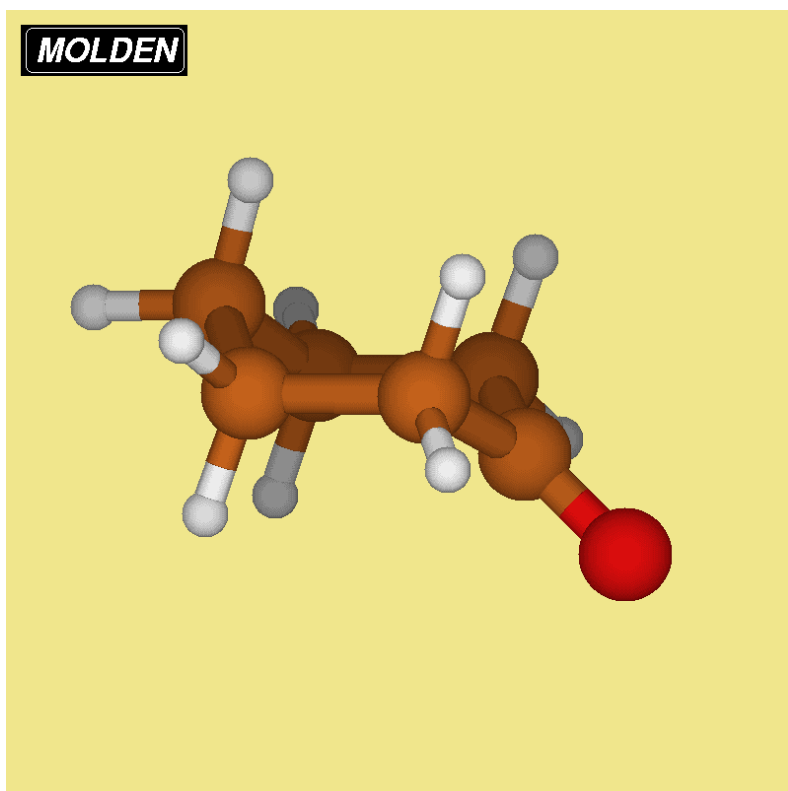

|   |          |         |          |
|---|----------|---------|----------|
| C | 0.07942  | 1.9569  | 0.0853   |
| C | -0.00815 | 0.45946 | -0.17276 |

|   |          |          |          |
|---|----------|----------|----------|
| C | 0.05171  | -0.35775 | 1.13659  |
| C | 1.25302  | 0.04609  | 2.00335  |
| C | 1.23579  | 1.55054  | 2.31149  |
| C | 1.1961   | 2.39736  | 1.02099  |
| O | -0.69123 | 2.75174  | -0.42743 |
| H | 0.8516   | 0.18647  | -0.80351 |
| H | 2.18572  | -0.21048 | 1.47999  |
| H | 2.11103  | 1.83284  | 2.90793  |
| H | 1.07576  | 3.46369  | 1.23067  |
| H | -0.91757 | 0.25658  | -0.74484 |
| H | 2.14565  | 2.26814  | 0.47954  |
| H | 0.35312  | 1.78594  | 2.92161  |
| H | 1.25123  | -0.52799 | 2.93759  |
| H | -0.87548 | -0.19514 | 1.70283  |
| H | 0.08818  | -1.42699 | 0.89841  |

Frequencies:

|           |           |           |
|-----------|-----------|-----------|
| 92.8503   | 187.3565  | 306.5933  |
| 404.4207  | 417.2061  | 480.6587  |
| 490.8017  | 653.6997  | 751.7039  |
| 763.9325  | 841.0489  | 875.7540  |
| 896.8463  | 918.6457  | 999.7126  |
| 1025.5515 | 1063.1227 | 1079.6713 |
| 1136.8005 | 1137.3387 | 1241.6333 |
| 1248.3193 | 1273.6910 | 1288.8067 |
| 1339.4999 | 1348.0868 | 1367.1397 |
| 1381.3127 | 1382.0864 | 1468.5169 |
| 1474.8342 | 1496.6646 | 1497.6887 |
| 1512.3895 | 1786.2532 | 3013.0288 |
| 3016.4554 | 3019.5322 | 3029.9799 |
| 3031.7511 | 3071.5611 | 3075.3584 |
| 3079.6011 | 3112.2769 | 3113.6166 |

Rotational constants (GHZ): 4.19077 2.46854 1.72669

\*\*\*\*\*

Transition state structures

all structures optimized at the b3lyp/6-31g(d,p) level  
and used as input for g2mp2 calculation

\*\*\*\*\*

cyC6OO\_eq->cyC6OOH-1\_eq

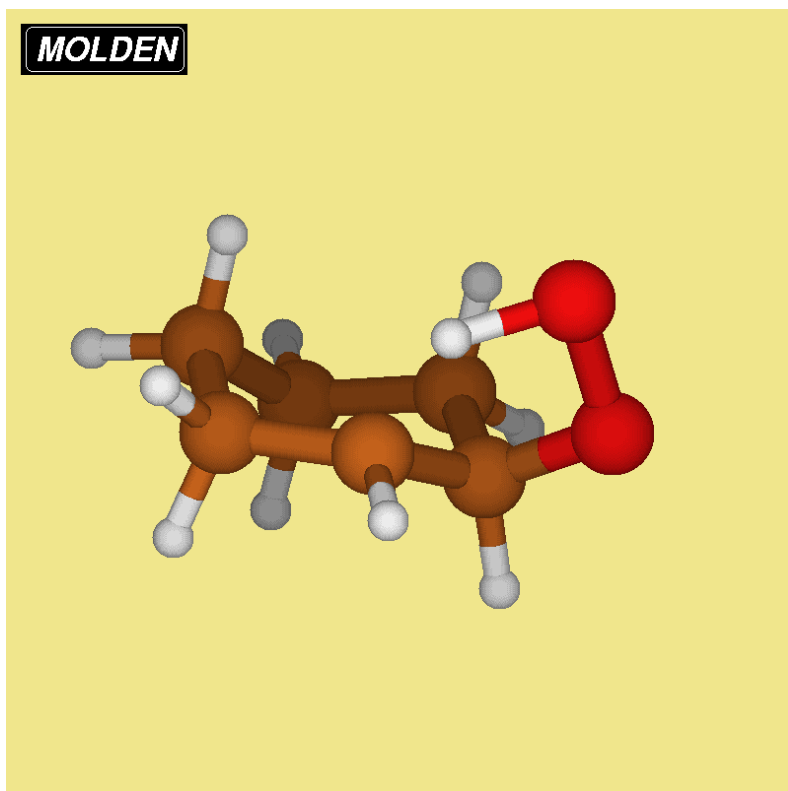

|   |          |          |          |
|---|----------|----------|----------|
| c | 0.71731  | 0.3279   | -0.70189 |
| c | 0.23983  | -1.10795 | -0.42228 |
| c | -1.23054 | -1.37517 | -0.23457 |
| c | -1.96046 | -0.2592  | 0.52836  |
| c | -1.61745 | 1.11959  | -0.05196 |
| c | -0.10751 | 1.38776  | 0.03857  |
| h | 1.0571   | -1.0552  | 0.67837  |
| h | -1.66926 | -0.28677 | 1.58663  |
| h | -2.16383 | 1.90473  | 0.48224  |
| h | 0.14269  | 2.37859  | -0.35495 |
| h | 0.77046  | -1.85547 | -1.01934 |
| h | 0.20215  | 1.36648  | 1.08868  |
| h | -1.94964 | 1.16931  | -1.0993  |
| h | -3.04116 | -0.43626 | 0.4937   |
| h | -1.37702 | -2.35002 | 0.24798  |
| o | 2.08917  | 0.29002  | -0.26397 |
| o | 1.99845  | -0.34753 | 1.01052  |
| h | 0.76654  | 0.54444  | -1.77824 |
| h | -1.68604 | -1.4772  | -1.2356  |

Frequencies:

|            |          |          |
|------------|----------|----------|
| -2135.7736 | 123.4553 | 179.7917 |
| 273.7111   | 322.1500 | 378.6838 |
| 415.7029   | 476.7498 | 527.4923 |

|           |           |           |
|-----------|-----------|-----------|
| 573.1052  | 703.7465  | 780.9554  |
| 794.7941  | 855.1394  | 885.5154  |
| 898.1869  | 919.2771  | 936.4052  |
| 947.2468  | 1013.2923 | 1047.5781 |
| 1064.8364 | 1107.7329 | 1130.4566 |
| 1148.6213 | 1173.1460 | 1206.0916 |
| 1265.2582 | 1277.2636 | 1307.0219 |
| 1341.5170 | 1350.8380 | 1375.0968 |
| 1387.3633 | 1390.3411 | 1404.7272 |
| 1470.4773 | 1498.9920 | 1504.8345 |
| 1514.5574 | 1724.7167 | 2966.5452 |
| 3018.9542 | 3034.4105 | 3035.6681 |
| 3055.0740 | 3058.9424 | 3080.5973 |
| 3084.7321 | 3105.1260 | 3108.9525 |

ROTATIONAL CONSTANTS (GHZ)      3.42018    1.65734    1.36523

\*\*\*\*\*

cyC6OO\_ax->cyC6OOH-1\_ax

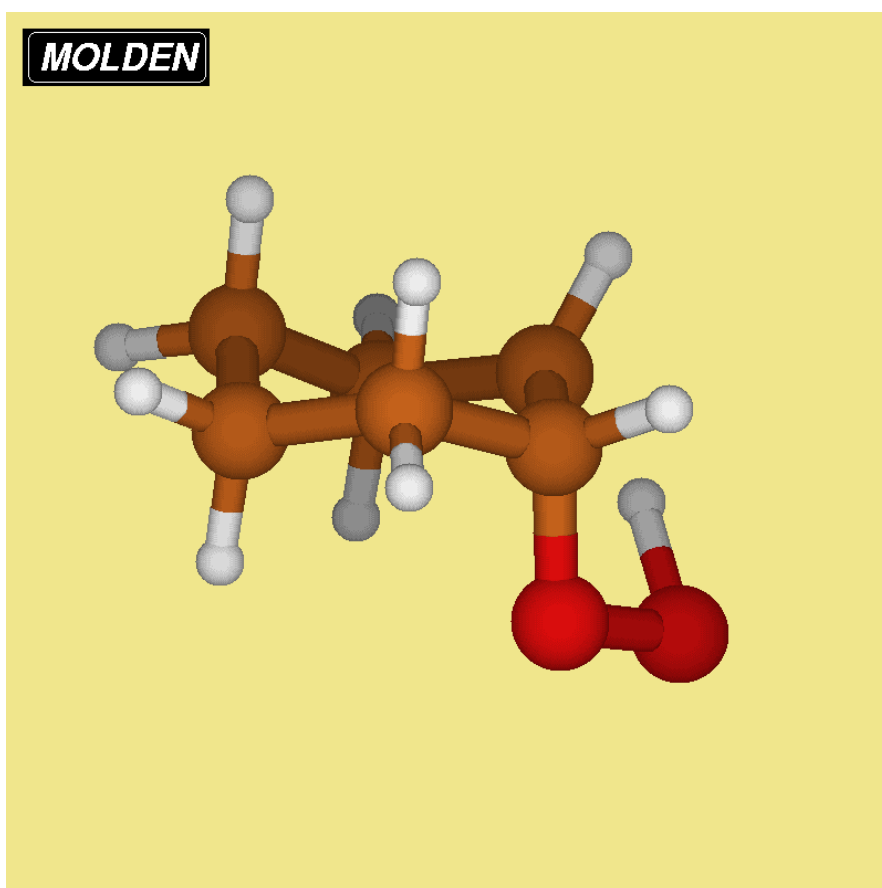

C 0.6908757018 -0.5546155372 0.612880895  
C -0.5229474534 -1.4707826797 0.4491227401

C -1.5707451961 -0.9011372298 -0.518718838  
C -1.9671833703 0.5314628028 -0.1366324329  
C -0.7300693211 1.4624884691 -0.1436398058  
C 0.3463352769 0.9359287903 0.7798025907  
H -0.9691563325 -1.603985587 1.4433514587  
H -2.4284374338 0.5368384325 0.8605180426  
H -1.0102954717 2.4833760613 0.1343749234  
H 1.5662530706 1.176525437 0.2182996355  
H -0.1788237187 -2.4596330127 0.1243298777  
H 0.3137021771 1.3001038241 1.8087294796  
H -0.3435181446 1.496856401 -1.1700030926  
H -2.7170690776 0.9218178511 -0.8342611261  
H -2.4532972102 -1.5509498924 -0.526491088  
H -1.1637822388 -0.9048588199 -1.5367430948  
H 1.3285142789 -0.8801881817 1.4458518714  
O 1.4590193793 -0.5768631264 -0.6049033766  
O 2.3632701551 0.5098668507 -0.4232025962

Frequencies:

|            |           |           |
|------------|-----------|-----------|
| -2121.1456 | 140.5665  | 167.7182  |
| 250.6398   | 297.3353  | 352.8005  |
| 431.4250   | 459.6612  | 580.2063  |
| 622.0319   | 691.6956  | 781.1056  |
| 820.5489   | 839.2504  | 867.0788  |
| 894.2013   | 919.5131  | 943.5970  |
| 965.9532   | 1007.0835 | 1039.9456 |
| 1052.7532  | 1091.1328 | 1139.3875 |
| 1143.0572  | 1171.0453 | 1198.1713 |
| 1276.2923  | 1292.5145 | 1336.4283 |
| 1341.3066  | 1355.7396 | 1364.7531 |
| 1386.1034  | 1396.5918 | 1399.9821 |
| 1485.0607  | 1495.6195 | 1502.1772 |
| 1512.3014  | 1720.8788 | 3027.7619 |
| 3028.4880  | 3042.1056 | 3043.1424 |
| 3047.5828  | 3078.7866 | 3082.3983 |
| 3093.4421  | 3096.6827 | 3130.1498 |

Rotational constants (GHZ): 3.30231 1.78531 1.41552

\*\*\*\*\*

cyC6OO\_eq --> cyC6H10O + OH



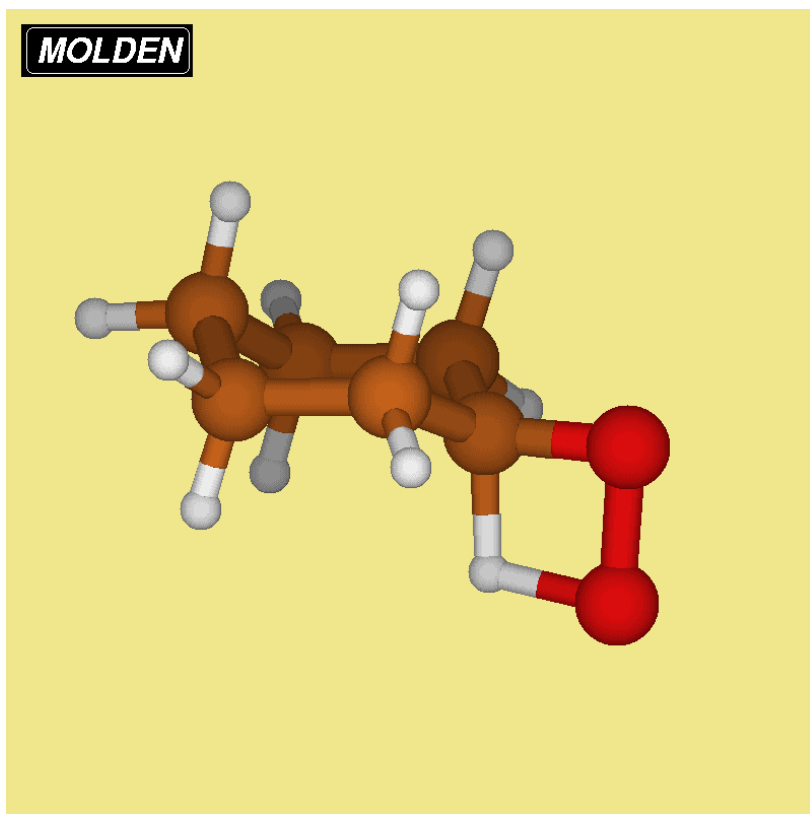

```
C -0.7140144279 0.0001913901 0.1483806436
C 0.0418650523 1.2934288191 0.3684530253
C 1.4163598547 1.2696991195 -0.3213619015
C 2.2056790789 -0.0001071564 0.0326923415
C 1.416338654 -1.2697603086 -0.3219693236
C 0.0412745204 -1.2936726305 0.3668347709
H 0.1721336566 1.4134256845 1.4560377035
H 2.4317529593 -0.0003661623 1.1084348652
H 1.9833473276 -2.1651453416 -0.0447264815
H -0.5717611267 -2.1350576711 0.0292739525
H -0.5710194224 2.1357111721 0.0328787068
H 0.1705545695 -1.4156830265 1.4542993637
H 1.2743775697 -1.3142799465 -1.410269618
H 3.1697910827 -0.000010945 -0.4882216012
H 1.9836308471 2.1650729437 -0.0446350382
O -2.0308080871 0.0001307707 0.6281808232
O -2.5297186687 0.0001885999 -0.7866522539
H -1.2771040014 0.0009673196 -1.0539220948
H 1.2734941893 1.3141356101 -1.4095556506
```

Frequencies:

|            |          |          |
|------------|----------|----------|
| -1770.9788 | 104.4900 | 113.3250 |
| 226.2836   | 282.9000 | 354.6761 |

|           |           |           |
|-----------|-----------|-----------|
| 360.5129  | 436.5522  | 449.2529  |
| 552.9884  | 649.0568  | 784.8491  |
| 815.7742  | 835.0211  | 850.2993  |
| 900.6466  | 904.5669  | 919.2699  |
| 984.0582  | 996.9838  | 1031.4493 |
| 1081.6245 | 1102.6664 | 1125.8792 |
| 1157.6655 | 1167.8915 | 1246.2931 |
| 1272.0148 | 1288.8900 | 1303.9454 |
| 1349.6391 | 1375.2428 | 1377.6436 |
| 1389.0147 | 1394.8099 | 1476.5559 |
| 1485.8428 | 1499.9113 | 1502.8960 |
| 1516.9764 | 1953.4286 | 2997.5365 |
| 3002.7349 | 3023.9352 | 3032.7480 |
| 3035.8840 | 3080.9976 | 3083.6089 |
| 3087.3086 | 3097.0350 | 3098.0987 |

Rotational constants (GHZ):      3.65959    1.47388    1.21835

\*\*\*\*\*

cyC6OO\_ax->cyC6OOH-2

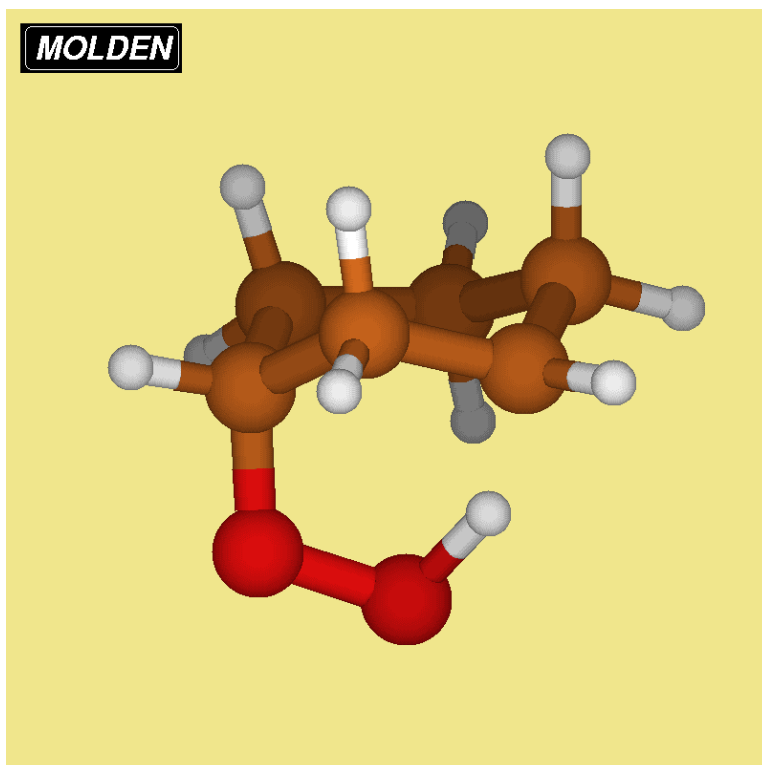

|   |          |          |          |
|---|----------|----------|----------|
| c | -0.88769 | 0.39743  | 0.7908   |
| c | 0.20341  | 1.44888  | 0.52835  |
| c | 1.31496  | 1.0135   | -0.45116 |
| c | 1.7831   | -0.44504 | -0.23452 |

|   |          |          |          |
|---|----------|----------|----------|
| c | 0.61021  | -1.37936 | -0.00892 |
| c | -0.26583 | -0.9714  | 1.14811  |
| h | 0.64632  | 1.67844  | 1.50752  |
| h | 2.43888  | -0.49442 | 0.65139  |
| h | 0.79246  | -2.44718 | -0.14056 |
| h | -1.06117 | -1.69693 | 1.34135  |
| h | -0.2694  | 2.37075  | 0.17363  |
| h | 0.3253   | -0.86206 | 2.07135  |
| h | -0.29794 | -1.01609 | -0.99091 |
| h | 2.39179  | -0.77162 | -1.08464 |
| h | 2.17039  | 1.69187  | -0.35432 |
| h | 0.93889  | 1.11016  | -1.47131 |
| h | -1.55663 | 0.74496  | 1.58631  |
| o | -1.80038 | 0.16877  | -0.29277 |
| o | -1.0831  | -0.25526 | -1.44794 |

Frequencies:

|            |           |           |
|------------|-----------|-----------|
| -1714.0750 | 186.2936  | 223.9261  |
| 261.5214   | 370.8167  | 391.6449  |
| 423.1505   | 515.7168  | 536.1240  |
| 610.1608   | 731.9644  | 772.9504  |
| 791.7527   | 840.5917  | 880.9379  |
| 885.0884   | 909.0435  | 930.0348  |
| 988.2989   | 1027.5170 | 1038.1203 |
| 1060.9697  | 1083.9043 | 1128.2602 |
| 1138.2124  | 1157.7020 | 1211.7434 |
| 1240.4194  | 1286.5349 | 1313.0460 |
| 1339.1488  | 1350.2550 | 1363.3515 |
| 1375.7919  | 1388.3104 | 1405.5148 |
| 1474.2253  | 1485.2840 | 1494.0320 |
| 1510.5805  | 1577.5882 | 2976.7536 |
| 2996.7667  | 3028.3178 | 3057.4810 |
| 3074.8902  | 3078.6128 | 3090.4046 |
| 3102.6099  | 3129.5359 | 3132.1229 |

ROTATIONAL CONSTANTS (GHZ)      2.77048    2.04413    1.87721

\*\*\*\*\*

cyC6OO\_eq->cyC6OOH-3

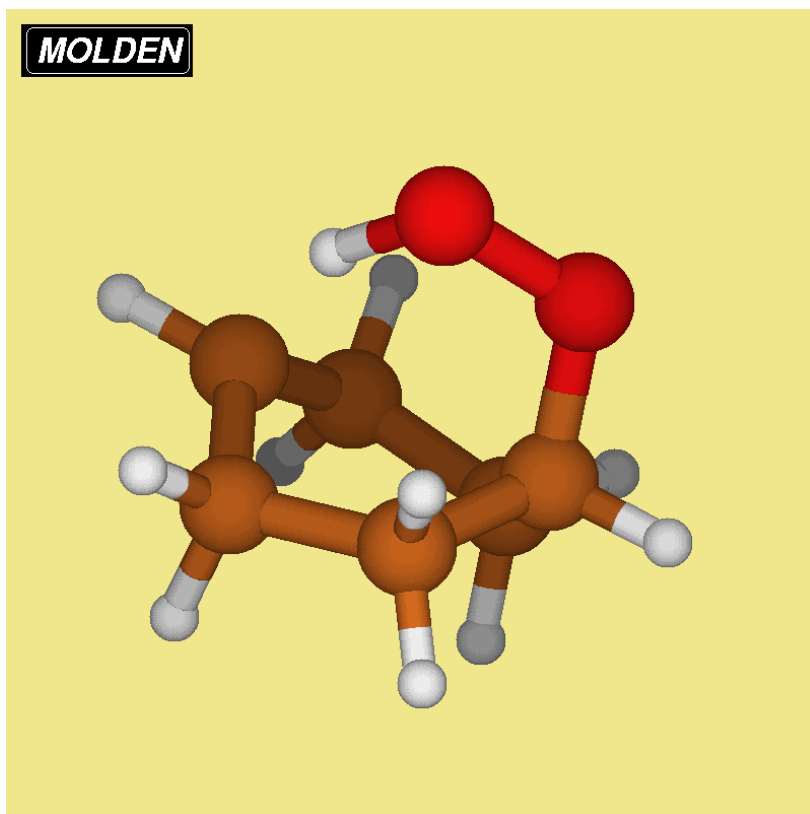

|   |          |          |          |
|---|----------|----------|----------|
| C | -0.73622 | 0.46134  | 0.86172  |
| C | 0.43333  | 1.42806  | 0.63414  |
| C | 1.24546  | 1.02149  | -0.62212 |
| C | 1.12145  | -0.46542 | -0.89703 |
| C | 1.00747  | -1.34591 | 0.33386  |
| C | -0.22583 | -0.94703 | 1.19722  |
| H | 1.06978  | 1.41083  | 1.52833  |
| H | 1.73644  | -0.84811 | -1.7143  |
| H | 1.93029  | -1.24429 | 0.92678  |
| H | -1.04169 | -1.65859 | 1.05553  |
| H | 0.05903  | 2.45073  | 0.53119  |
| H | 0.03948  | -0.9613  | 2.25974  |
| H | 0.94344  | -2.39976 | 0.04677  |
| H | -0.17408 | -0.56239 | -1.33883 |
| H | 2.304    | 1.2949   | -0.49508 |
| H | 0.89439  | 1.58362  | -1.49509 |
| H | -1.38876 | 0.8275   | 1.66267  |
| O | -1.59067 | 0.49983  | -0.32078 |
| O | -1.34012 | -0.60088 | -1.18102 |

Frequencies:

|            |          |          |
|------------|----------|----------|
| -1807.4082 | 132.3651 | 193.8167 |
| 266.6741   | 324.6550 | 340.6535 |
| 438.0120   | 491.0117 | 541.3257 |

|           |           |           |
|-----------|-----------|-----------|
| 634.4124  | 733.4202  | 773.5031  |
| 791.6140  | 824.9765  | 868.9568  |
| 890.8955  | 911.6409  | 927.6301  |
| 977.1278  | 1011.3986 | 1045.3366 |
| 1063.5992 | 1103.8534 | 1111.3396 |
| 1156.5601 | 1175.2173 | 1232.7129 |
| 1253.8515 | 1271.1689 | 1304.1598 |
| 1338.1835 | 1349.2392 | 1356.7132 |
| 1370.7392 | 1383.3794 | 1394.1111 |
| 1480.6390 | 1484.1931 | 1496.6379 |
| 1510.7010 | 1534.8805 | 2992.8965 |
| 3004.2834 | 3042.1187 | 3057.7875 |
| 3068.1417 | 3073.4362 | 3090.2076 |
| 3103.3642 | 3122.6301 | 3131.4337 |

ROTATIONAL CONSTANTS (GHZ):            2.53249    2.17529    2.00519

\*\*\*\*\*

cyC6OO\_eq->HO2 + cyC6H10

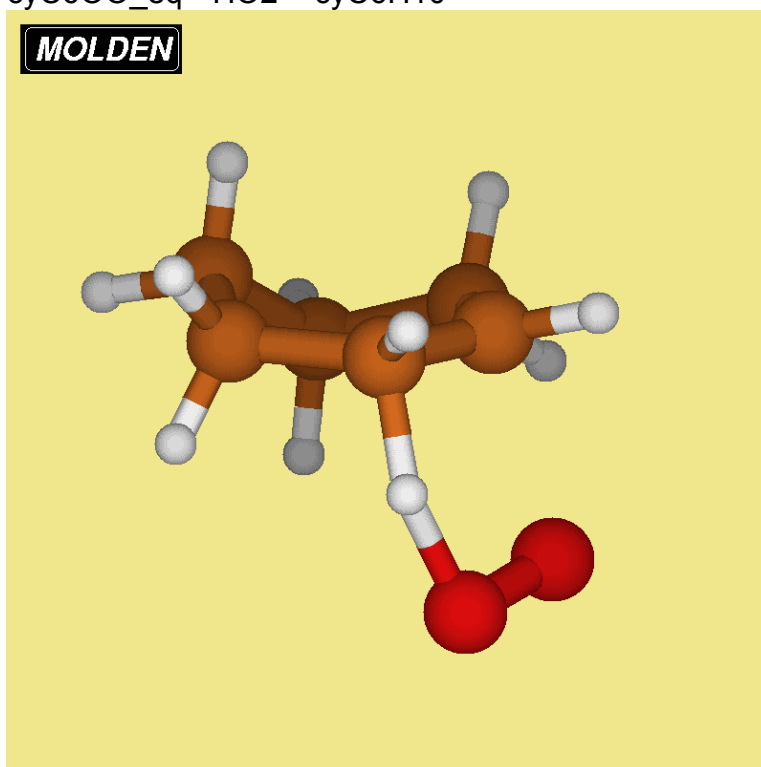

|   |          |          |          |
|---|----------|----------|----------|
| c | 0.36521  | 0.37925  | 1.05621  |
| c | 0.16232  | -0.97925 | 0.79544  |
| c | -1.04152 | -1.45068 | -0.0402  |
| c | -2.04204 | -0.32208 | -0.33767 |
| c | -1.31937 | 0.97447  | -0.72583 |

|   |          |          |          |
|---|----------|----------|----------|
| c | -0.46109 | 1.47189  | 0.44405  |
| h | 0.49873  | -1.66693 | 1.5742   |
| h | -2.6551  | -0.13167 | 0.55402  |
| h | -2.03815 | 1.74876  | -1.01494 |
| h | 0.18252  | 2.30647  | 0.14471  |
| h | 1.21308  | -1.07339 | -0.01269 |
| h | -1.11613 | 1.86711  | 1.23824  |
| h | -0.67756 | 0.79427  | -1.59767 |
| h | -2.73049 | -0.63461 | -1.13065 |
| h | -1.54722 | -2.2654  | 0.49003  |
| h | -0.6934  | -1.88136 | -0.98839 |
| h | 1.02224  | 0.66441  | 1.87312  |
| o | 2.11803  | 0.5989   | -0.32561 |
| o | 2.20202  | -0.62006 | -0.70964 |

Frequencies:

|           |           |           |
|-----------|-----------|-----------|
| -988.4217 | 83.2437   | 121.3588  |
| 195.7356  | 217.9193  | 312.0538  |
| 395.5025  | 443.2178  | 469.6227  |
| 542.7286  | 646.5240  | 712.0717  |
| 796.8275  | 819.6862  | 829.4360  |
| 888.0832  | 911.3666  | 946.3271  |
| 972.6830  | 1029.1322 | 1054.2250 |
| 1077.3803 | 1107.8751 | 1152.7932 |
| 1185.3275 | 1238.0802 | 1278.7344 |
| 1288.0729 | 1309.0648 | 1341.3329 |
| 1354.2114 | 1378.1445 | 1385.8200 |
| 1392.7389 | 1411.9149 | 1471.4498 |
| 1501.1832 | 1507.4625 | 1519.4446 |
| 1566.9382 | 1597.5704 | 2991.4266 |
| 3025.9407 | 3030.0454 | 3042.5185 |
| 3073.1804 | 3077.1268 | 3083.3845 |
| 3090.1578 | 3116.0355 | 3190.5243 |

ROTATIONAL CONSTANTS (GHZ):            2.97569    1.58837    1.33456

\*\*\*\*\*

cyC6OO\_ax->HO2 + cyC6H10

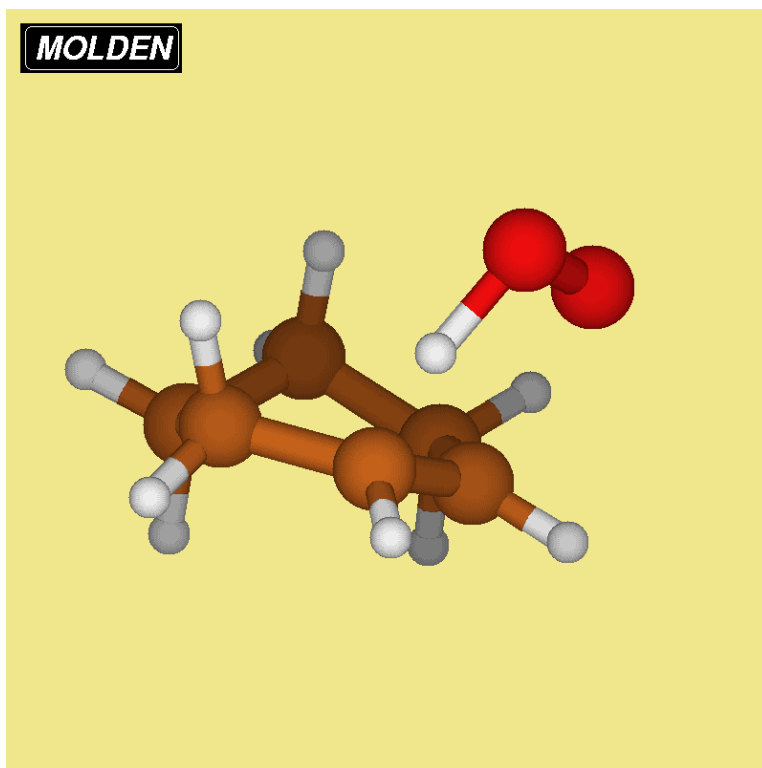

```
C -0.3786255818 0.3792833826 1.0518138441
C 0.461019351 1.4689582127 0.4522709147
C 1.3334359623 0.9692170487 -0.7061427208
C 2.0444775626 -0.3313770023 -0.3097095253
C 1.0339094447 -1.4552270729 -0.0289415282
C -0.1776341718 -0.9797512179 0.7931753175
H 1.1068586724 1.8598288918 1.2561516432
H 2.6453903898 -0.1454093916 0.5911442227
H 1.5278590861 -2.2753212862 0.5040237605
H -1.2182649465 -1.0693181668 -0.030230204
H -0.1743740284 2.3070558997 0.1454068148
H -0.526007747 -1.6665166994 1.5674674537
H 0.6949577832 -1.8796175444 -0.9832937862
H 2.7428180337 -0.6460860231 -1.0931159051
H 2.0595682392 1.7407106349 -0.9840860739
H 0.7032454238 0.7929510646 -1.5872039274
H -1.0445542746 0.6668776894 1.8606485203
O -2.1089939162 0.60946099 -0.3539448476
O -2.1931300881 -0.6084328868 -0.7412689438
```

Frequencies:

|           |          |          |
|-----------|----------|----------|
| -992.0019 | 83.4970  | 121.8014 |
| 195.9023  | 218.6134 | 312.4966 |
| 395.9936  | 443.1155 | 469.6371 |
| 542.8538  | 645.7381 | 711.6122 |

|           |           |           |
|-----------|-----------|-----------|
| 796.9223  | 819.9133  | 829.4331  |
| 887.9885  | 911.2930  | 946.3885  |
| 973.1776  | 1029.2555 | 1054.1940 |
| 1077.1453 | 1107.9563 | 1152.7073 |
| 1185.3114 | 1238.1587 | 1278.7482 |
| 1287.6442 | 1308.9936 | 1341.3897 |
| 1354.1300 | 1378.2122 | 1385.8386 |
| 1392.6572 | 1411.7542 | 1471.5522 |
| 1501.1602 | 1507.4866 | 1519.4211 |
| 1567.1322 | 1597.7582 | 2990.9672 |
| 3025.7060 | 3029.9397 | 3042.5845 |
| 3073.4022 | 3077.3605 | 3083.3779 |
| 3090.3056 | 3116.0218 | 3190.3159 |

Rotational constants (GHZ):      2.97506    1.58972    1.33575

\*\*\*\*\*

cyC6OOH-1\_eq-> epocyC6-1 + OH

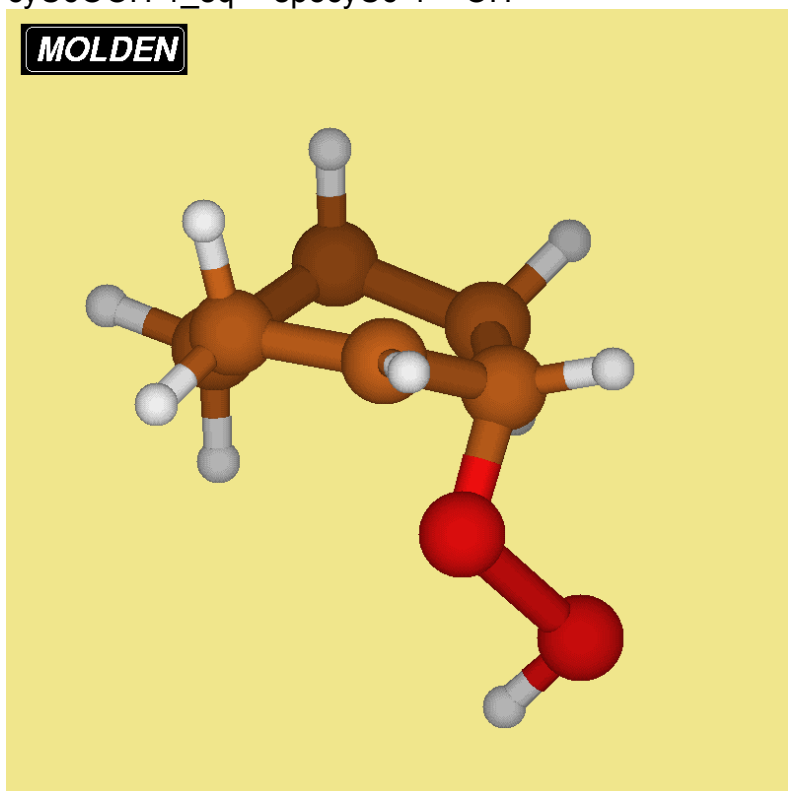

|   |         |         |         |
|---|---------|---------|---------|
| C | 0.86384 | 1.258   | 2.09849 |
| C | 1.31465 | 0.478   | 3.28043 |
| O | 0.75116 | 2.3191  | 3.02134 |
| C | 1.87457 | 1.49977 | 0.96909 |
| C | 2.75056 | 0.41125 | 3.67407 |



|   |          |          |         |
|---|----------|----------|---------|
| C | 3.32097  | 1.09372  | 1.31765 |
| C | 3.64452  | 1.30655  | 2.80189 |
| H | -0.11923 | 0.95768  | 1.71432 |
| H | 0.56066  | 0.0206   | 3.91295 |
| H | 1.54648  | 0.968    | 0.06899 |
| H | 1.80582  | 2.56923  | 0.74693 |
| H | 2.86353  | 0.64614  | 4.74111 |
| H | 3.07619  | -0.63982 | 3.57359 |
| H | 3.47429  | 0.03201  | 1.07873 |
| H | 4.02262  | 1.65216  | 0.68848 |
| H | 3.47609  | 2.35423  | 3.07366 |
| H | 4.6972   | 1.08103  | 3.00387 |
| O | 0.11237  | 3.6966   | 2.18188 |
| H | 0.63278  | 4.32089  | 2.71382 |

Frequencies:

|           |           |           |
|-----------|-----------|-----------|
| -693.6315 | 69.5893   | 121.3087  |
| 136.7123  | 166.6273  | 260.3624  |
| 295.0936  | 377.9392  | 408.2513  |
| 456.6642  | 524.7614  | 653.2123  |
| 700.3883  | 802.3128  | 819.3739  |
| 858.0766  | 874.8982  | 897.0100  |
| 962.2706  | 997.0796  | 1018.4222 |
| 1055.0112 | 1062.8670 | 1087.5528 |
| 1141.3611 | 1179.1512 | 1205.7483 |
| 1263.8983 | 1295.1480 | 1309.5954 |
| 1357.6363 | 1368.0686 | 1374.4998 |
| 1395.5843 | 1414.2648 | 1425.2189 |
| 1467.7106 | 1497.2633 | 1504.2962 |
| 1516.1268 | 2963.6065 | 3023.2715 |
| 3036.6086 | 3039.3381 | 3056.6549 |
| 3060.7714 | 3079.0738 | 3100.7242 |
| 3109.5454 | 3208.9526 | 3785.4467 |

ROTATIONAL CONSTANTS (GHZ)      3.08976    1.61892    1.36694

\*\*\*\*\*

cyC6OOH-1\_ax-> epocyC6-1 + OH

**MOLDEN**

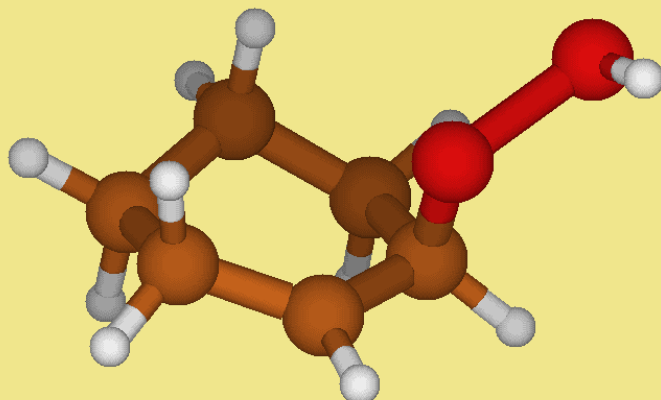

```
C 0.310092503 -1.3380483121 0.4936246707
C -0.6081073813 -0.2134190251 0.8123234799
C -0.0149331423 1.1899777935 0.7669783133
C 0.9992119908 1.3453188438 -0.3736845179
C 2.0992602461 0.2788473599 -0.2769504175
C 1.5206431838 -1.1467025786 -0.3606680725
O -1.2643244959 -0.6086197775 -0.3651097233
O -2.7212880045 0.3600158919 -0.5220403403
H 0.4688174611 1.3919769861 1.7329841966
H 2.6306723456 0.3958873907 0.6772937856
H 2.2765420495 -1.894571326 -0.0862973168
H -3.2847600971 -0.4272819161 -0.6025461126
H -0.8416523132 1.8988344109 0.6600003855
H 0.0109373966 -2.3389167179 0.7871554504
H 1.2495548689 -1.3743698658 -1.4034752886
H 2.8444561471 0.4142784846 -1.0684884812
H 1.4426003704 2.3467193389 -0.3450205342
H 0.4750151644 1.2523019492 -1.3315938682
H -1.2242877908 -0.3718721383 1.7074475578
```

Frequencies:

|           |          |          |
|-----------|----------|----------|
| -702.4614 | 76.1926  | 142.6918 |
| 149.4278  | 173.6473 | 260.9143 |

|           |           |           |
|-----------|-----------|-----------|
| 296.9663  | 376.1535  | 403.9782  |
| 469.7754  | 521.0809  | 663.8551  |
| 689.8856  | 795.3067  | 812.1885  |
| 864.6385  | 874.8453  | 906.3339  |
| 938.6072  | 992.4143  | 1015.4335 |
| 1055.6193 | 1064.3394 | 1085.1268 |
| 1139.8813 | 1169.1872 | 1210.1442 |
| 1262.0436 | 1289.0089 | 1308.3627 |
| 1358.2097 | 1371.7032 | 1383.8678 |
| 1394.7362 | 1410.6459 | 1428.9532 |
| 1467.2519 | 1486.9063 | 1504.0657 |
| 1514.0377 | 3001.7584 | 3024.6032 |
| 3028.8333 | 3038.2772 | 3050.5225 |
| 3053.1030 | 3082.6714 | 3097.2822 |
| 3106.4346 | 3210.1891 | 3782.9802 |

Rotational constants (GHZ):      3.34336    1.57431    1.29789

\*\*\*\*\*

cyC6OOH-1\_eq-> cyC6H10 + HO2

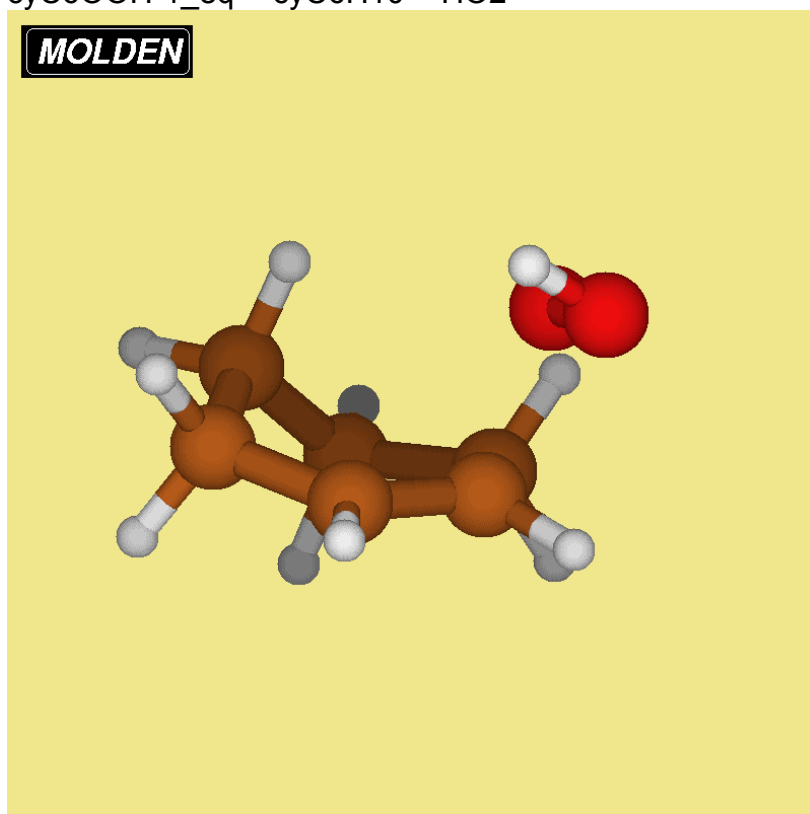

C -0.2503033687 0.6694777902 -0.7061636481  
C -0.0681254819 1.1673083046 0.580059257  
C 0.87620193 0.546352511 1.5669307227  
C 1.4994174094 -0.7517397225 1.0325791948

C 1.9716330566 -0.5532137013 -0.4128353327  
C 0.7831703974 -0.2439470663 -1.3402869208  
H -0.711165604 1.9735825348 0.9265522051  
H 0.7466855203 -1.5491650706 1.0596224221  
H 2.5027208246 -1.4401429275 -0.7751777334  
H 1.1373500541 0.2164547146 -2.2707185655  
H 0.2765719842 -1.1709958073 -1.6350671531  
H 2.6914237707 0.2760355923 -0.4415635017  
H 2.3286342605 -1.0650404858 1.6762881626  
H 0.356488441 0.3643817805 2.5186150081  
O -1.6227525958 -0.6309423513 -0.4522941075  
O -2.8711761396 -0.0016997456 -0.3481210707  
H -0.8559560587 1.2580050476 -1.3885983261  
H 1.671960007 1.2704710131 1.8102609727  
H -3.0652469734 -0.0778783112 0.6014082964

Frequencies:

|           |           |           |
|-----------|-----------|-----------|
| -484.8173 | 55.1957   | 88.5358   |
| 142.9092  | 196.3879  | 288.9233  |
| 330.0283  | 354.9742  | 406.2701  |
| 461.1708  | 499.4077  | 673.5712  |
| 721.4578  | 811.3165  | 825.0096  |
| 885.3296  | 893.4500  | 914.7992  |
| 960.5054  | 1012.6966 | 1050.3123 |
| 1058.6619 | 1070.5934 | 1084.5207 |
| 1156.1922 | 1165.1835 | 1227.9612 |
| 1266.8476 | 1297.5477 | 1354.0962 |
| 1371.4985 | 1377.5303 | 1378.8857 |
| 1393.5128 | 1424.4560 | 1470.9891 |
| 1488.2066 | 1506.7345 | 1517.3187 |
| 1521.3122 | 2980.0992 | 3024.6183 |
| 3029.6400 | 3041.9837 | 3047.2953 |
| 3073.0841 | 3085.9775 | 3092.0662 |
| 3165.1811 | 3190.1879 | 3713.4797 |

Rotational constants (GHZ): 3.28044 1.41320 1.21909

\*\*\*\*\*

cyC6OOH-1\_ax-> cyC6H10 + HO2

**MOLDEN**

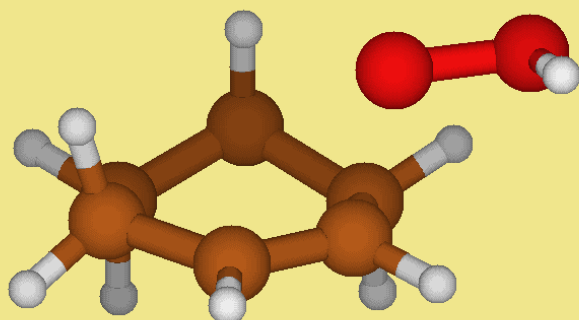

```
C 0.4847425763 -1.3508959088 0.4678010307
C -0.420117524 -0.3585546386 0.8184229914
C -0.0291125284 1.0990303608 0.7635372302
C 0.9954129344 1.3665114624 -0.3461871938
C 2.1764310974 0.3902287057 -0.2493679106
C 1.7040653134 -1.070587665 -0.359586599
O -1.6550181781 -0.4127310599 -0.6907943743
O -2.8420758378 0.2015738248 -0.2654948487
H 0.3949444329 1.3784413517 1.7403722168
H 2.6842304196 0.5320541621 0.7141945636
H 2.5114451879 -1.7625316323 -0.0865603834
H -3.416632273 -0.5584738607 -0.0668623837
H -0.9294217826 1.7057131894 0.6280274725
H 0.2339648292 -2.3891110424 0.672816458
H 1.4679445943 -1.300961392 -1.412835254
H 2.9180801296 0.6001949967 -1.0282340116
H 1.3500708071 2.4018526227 -0.2898167677
H 0.496216581 1.247368634 -1.3149730349
H -1.2026220127 -0.6196830486 1.5264676144
```

Frequencies:

|           |          |          |
|-----------|----------|----------|
| -503.3161 | 31.5022  | 100.6156 |
| 141.4081  | 231.1525 | 282.4216 |
| 310.5796  | 386.7336 | 429.2666 |

|           |           |           |
|-----------|-----------|-----------|
| 462.7929  | 506.4031  | 664.0350  |
| 728.6067  | 816.9875  | 827.3894  |
| 884.2031  | 900.9457  | 920.0201  |
| 943.5496  | 1014.9716 | 1030.3689 |
| 1047.1495 | 1068.6759 | 1087.7114 |
| 1150.1769 | 1158.3502 | 1230.9718 |
| 1266.4042 | 1298.8985 | 1356.2961 |
| 1360.8779 | 1374.3469 | 1386.0730 |
| 1394.4328 | 1425.3359 | 1471.4684 |
| 1491.2201 | 1504.3778 | 1514.3455 |
| 1526.3213 | 2975.5679 | 3007.8251 |
| 3029.1622 | 3047.9603 | 3049.8654 |
| 3079.1160 | 3093.0087 | 3099.1484 |
| 3162.5565 | 3179.7626 | 3695.4155 |

Rotational constants (GHZ):        3.48078    1.38928    1.18777

\*\*\*\*\*

cyC6OOH-2\_ax-> epocyC6-2 + OH

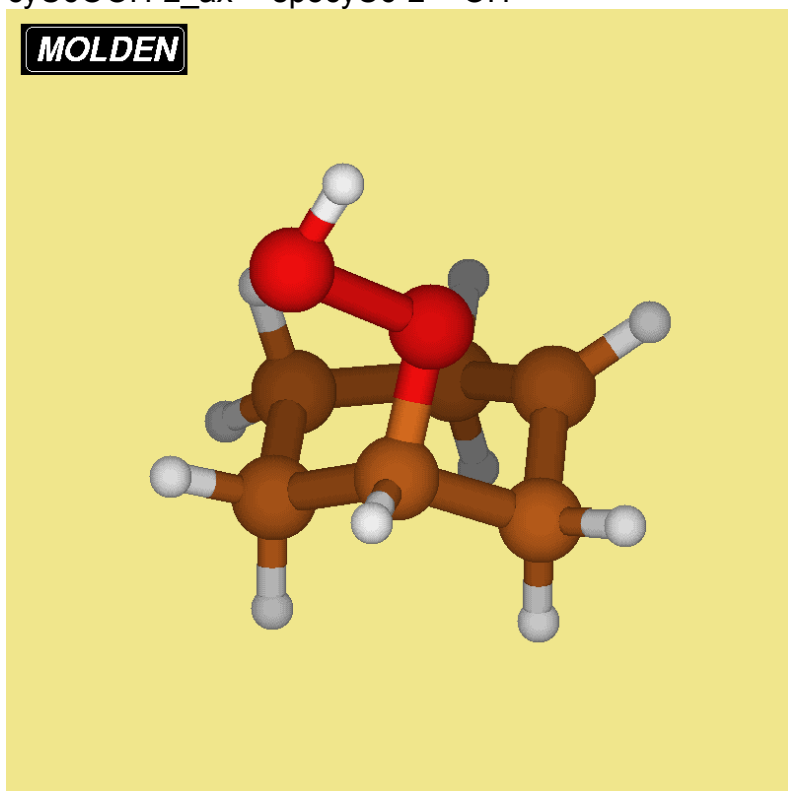

|   |          |          |         |
|---|----------|----------|---------|
| C | 0.17913  | 0.39135  | 0.07406 |
| C | -0.06109 | -0.46062 | 1.32331 |
| C | 1.07065  | 0.14437  | 2.11016 |
| C | 2.45207  | -0.22169 | 1.65823 |
| C | 2.6757   | 0.12808  | 0.1634  |

|   |          |          |          |
|---|----------|----------|----------|
| C | 1.41584  | -0.09482 | -0.69513 |
| H | 0.03421  | -1.54397 | 1.15903  |
| H | 2.57739  | -1.30918 | 1.80377  |
| H | 3.52563  | -0.43625 | -0.23465 |
| H | 1.51179  | 0.46197  | -1.6317  |
| H | -1.03433 | -0.24755 | 1.7707   |
| H | 1.28284  | -1.15355 | -0.95561 |
| H | 2.92824  | 1.18943  | 0.10535  |
| H | 3.21401  | 0.26372  | 2.27636  |
| H | 0.91279  | 0.54305  | 3.10736  |
| H | -0.68532 | 0.5584   | -0.57423 |
| O | 0.50285  | 1.60468  | 0.7971   |
| O | 0.4594   | 2.75976  | -0.47709 |
| H | 0.34611  | 3.50589  | 0.13283  |

Frequencies:

|           |           |           |
|-----------|-----------|-----------|
| -732.5338 | 106.0201  | 142.0395  |
| 192.0875  | 229.2360  | 295.1476  |
| 347.5351  | 392.3747  | 417.5228  |
| 519.2153  | 560.0182  | 666.3132  |
| 739.3788  | 822.0190  | 854.9067  |
| 864.7194  | 881.5207  | 928.0563  |
| 954.5570  | 1015.8579 | 1021.7335 |
| 1044.2776 | 1067.5767 | 1104.3339 |
| 1113.2657 | 1134.5889 | 1190.3526 |
| 1220.8446 | 1261.7197 | 1297.1617 |
| 1306.8687 | 1348.1193 | 1348.8300 |
| 1366.3819 | 1391.3956 | 1401.5528 |
| 1484.8750 | 1491.6460 | 1498.1954 |
| 1510.5381 | 2965.7309 | 3012.0886 |
| 3036.5379 | 3065.5239 | 3086.3119 |
| 3094.8009 | 3104.2265 | 3120.6705 |
| 3123.9972 | 3199.8785 | 3794.9387 |

ROTATIONAL CONSTANTS (GHZ)      2.87608    1.87338    1.63220

\*\*\*\*\*

cyC6OOH-2\_ax -> cyC6O\_OH-2\_ax; original basis?

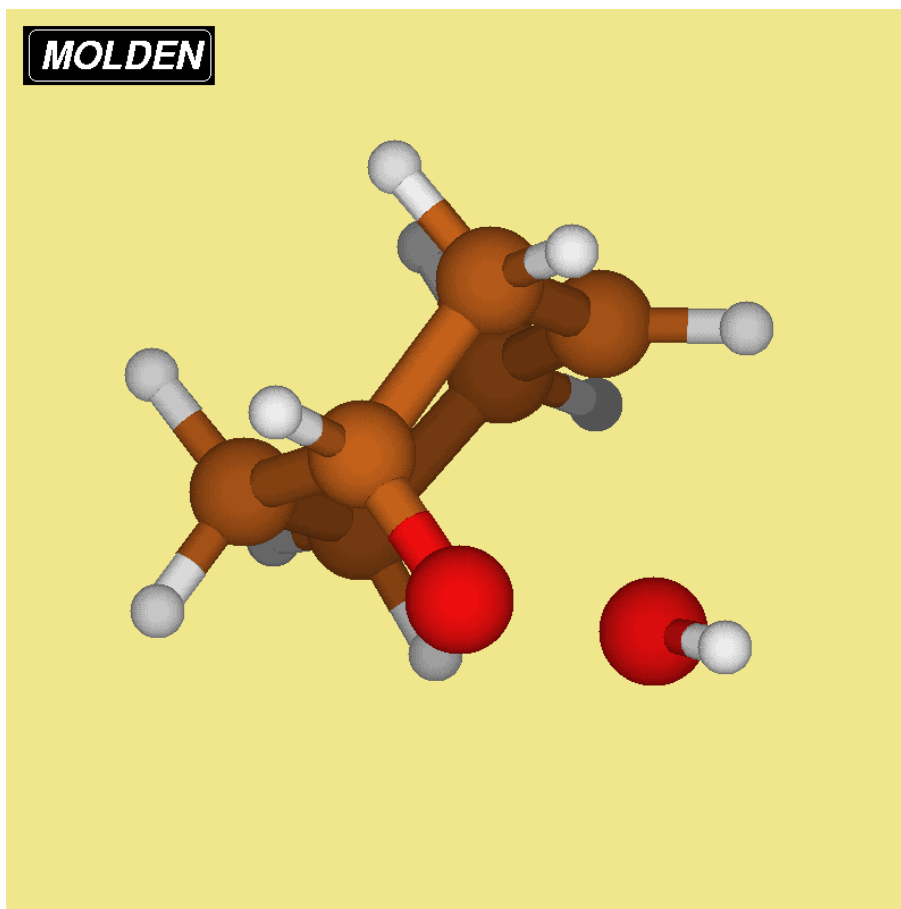

|   |           |           |           |
|---|-----------|-----------|-----------|
| C | -0.853839 | 0.395123  | 0.760294  |
| C | 0.235530  | 1.468955  | 0.574125  |
| C | 1.303895  | 1.044946  | -0.445303 |
| C | 1.903997  | -0.346692 | -0.098613 |
| C | 0.824182  | -1.328049 | 0.209546  |
| C | -0.152387 | -0.974288 | 1.229624  |
| H | 0.702470  | 1.672130  | 1.549007  |
| H | 2.545525  | -0.230209 | 0.792307  |
| H | 0.750955  | -2.257094 | -0.339621 |
| H | -0.917374 | -1.737285 | 1.387775  |
| H | -0.245759 | 2.396464  | 0.246236  |
| H | 0.324639  | -0.733791 | 2.189989  |
| H | -1.569466 | -1.278877 | -1.644990 |
| H | 2.545659  | -0.699978 | -0.910797 |
| H | 2.109479  | 1.787173  | -0.485733 |
| H | 0.846700  | 0.989832  | -1.435537 |
| H | -1.524811 | 0.659729  | 1.595522  |
| O | -1.670988 | 0.204515  | -0.307789 |
| O | -0.764839 | -0.747201 | -1.544279 |

cyC6OOH-2\_ax -> cyC6O\_OH-2\_ax; larger basis ?



**MOLDEN**

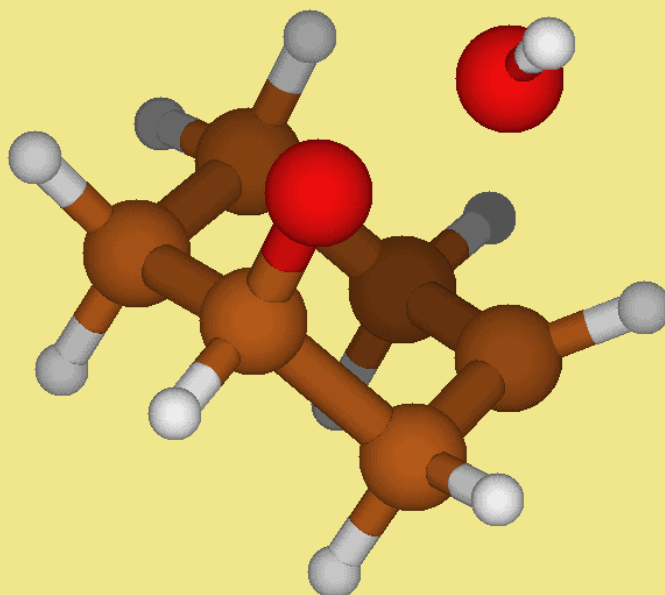

|   |           |           |           |
|---|-----------|-----------|-----------|
| C | 0.725646  | 0.761376  | 0.678975  |
| C | 0.107180  | -0.553970 | 1.449843  |
| C | -0.664885 | -1.301505 | 0.483750  |
| C | -1.799801 | -0.619588 | -0.190388 |
| C | -1.267182 | 0.643191  | -0.933677 |
| C | -0.431696 | 1.521556  | 0.006358  |
| H | -0.518500 | -0.113332 | 2.234052  |
| H | -2.535985 | -0.287271 | 0.557177  |
| H | -2.117133 | 1.208288  | -1.328777 |
| H | -0.006283 | 2.363679  | -0.546433 |
| H | 0.934889  | -1.107189 | 1.890503  |
| H | -1.074512 | 1.940323  | 0.792385  |
| H | -0.650836 | 0.326665  | -1.776631 |
| H | -2.312240 | -1.283814 | -0.888923 |
| H | -0.289575 | -2.238557 | 0.098378  |
| H | 1.148915  | 1.339053  | 1.515766  |
| O | 1.780404  | 0.465975  | -0.102750 |
| O | 1.357134  | -0.936021 | -1.177933 |
| H | 2.305391  | -1.093832 | -1.271199 |

Frequencies:

|           |         |          |
|-----------|---------|----------|
| -788.7080 | 97.7476 | 117.7150 |
|-----------|---------|----------|

|           |           |           |
|-----------|-----------|-----------|
| 225.3989  | 240.3425  | 258.4034  |
| 346.1137  | 390.2868  | 407.0348  |
| 465.6291  | 495.7113  | 571.5817  |
| 711.5625  | 728.4984  | 794.4865  |
| 853.5101  | 874.5102  | 890.5188  |
| 907.7530  | 964.1102  | 993.0333  |
| 1006.5878 | 1049.2815 | 1077.0969 |
| 1127.2493 | 1166.1421 | 1176.6066 |
| 1211.1108 | 1248.2799 | 1266.0404 |
| 1290.1279 | 1320.5168 | 1331.2193 |
| 1358.0656 | 1379.6295 | 1421.0470 |
| 1475.4640 | 1482.5681 | 1491.3936 |
| 1496.2405 | 2967.0947 | 2971.8310 |
| 3001.6143 | 3022.7703 | 3037.6437 |
| 3069.0827 | 3083.4587 | 3104.8159 |
| 3127.1781 | 3217.8962 | 3821.7067 |

Rotational constants (GHZ):      2.60421    1.91095    1.76745

\*\*\*\*\*

cyC6O\_OH-2\_ax->C6H10O + OH

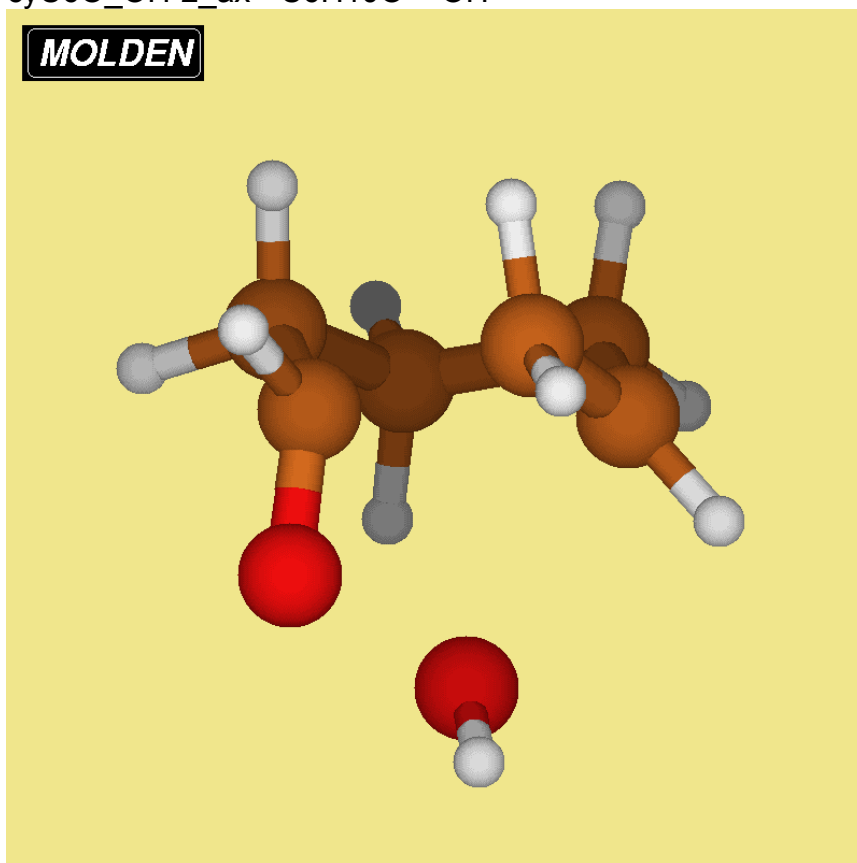

|   |          |         |         |
|---|----------|---------|---------|
| C | -0.94761 | 0.44645 | 0.75011 |
| C | 0.20247  | 1.45485 | 0.53219 |

|   |          |          |          |
|---|----------|----------|----------|
| C | 1.29381  | 1.02092  | -0.44956 |
| C | 1.88875  | -0.37539 | -0.08411 |
| C | 0.78248  | -1.33169 | 0.20564  |
| C | -0.08359 | -1.05419 | 1.27359  |
| H | 0.6428   | 1.68574  | 1.51258  |
| H | 2.5073   | -0.26369 | 0.81799  |
| H | 0.64335  | -2.19908 | -0.42573 |
| H | -0.85167 | -1.78959 | 1.50135  |
| H | -0.26863 | 2.37474  | 0.16616  |
| H | 0.39394  | -0.63889 | 2.16116  |
| H | -1.42997 | -1.22457 | -1.70575 |
| H | 2.53285  | -0.73322 | -0.89099 |
| H | 2.1096   | 1.75265  | -0.44925 |
| H | 0.87761  | 0.96832  | -1.45516 |
| H | -1.46764 | 0.66095  | 1.70524  |
| O | -1.77906 | 0.17825  | -0.20296 |
| O | -0.65323 | -0.64717 | -1.64074 |

Frequencies:

|           |           |           |
|-----------|-----------|-----------|
| -480.6710 | 120.1359  | 155.7839  |
| 251.1412  | 262.7297  | 352.0248  |
| 404.0711  | 429.6901  | 449.0150  |
| 475.6058  | 504.3784  | 557.0899  |
| 655.3872  | 697.6693  | 746.7217  |
| 802.3526  | 858.9202  | 881.6834  |
| 899.0375  | 929.6719  | 985.0895  |
| 999.2822  | 1047.1262 | 1050.7381 |
| 1098.1360 | 1152.9432 | 1187.5354 |
| 1227.3014 | 1252.6280 | 1287.7486 |
| 1325.6425 | 1329.8949 | 1363.4910 |
| 1383.7645 | 1426.2357 | 1461.5589 |
| 1484.2358 | 1495.7678 | 1509.9537 |
| 1551.1118 | 2908.7899 | 3020.7452 |
| 3020.9081 | 3061.6757 | 3081.3758 |
| 3113.3053 | 3115.4390 | 3159.8232 |
| 3197.1841 | 3248.4445 | 3799.2402 |

Rotational constants (GHZ):        2.49705    1.97683    1.84821

\*\*\*\*\*

cyC6OOH-2\_ax -> >C6H10O + OH; external

**MOLDEN**

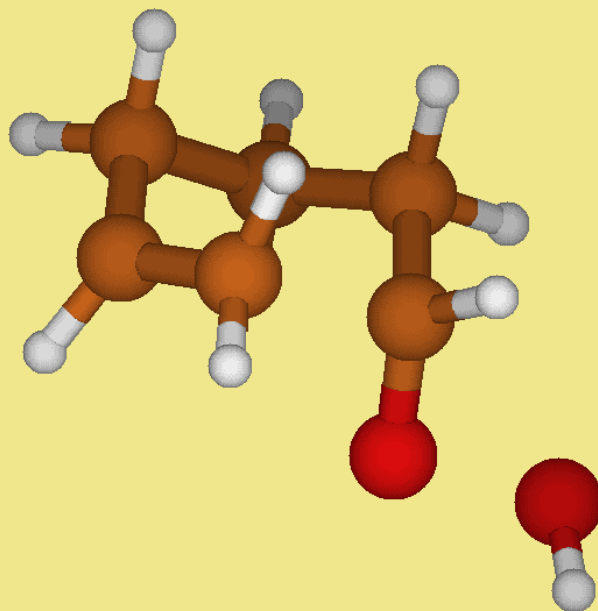

```
C 0.0621777571 0.4088429374 -0.1913720062
C 0.0169302395 -0.2294300794 1.5669805388
C 1.2423391348 0.1251759921 2.1625152868
C 2.5164898893 -0.3429435936 1.5472430509
C 2.6121481232 0.2937799995 0.1255854872
C 1.4048831883 -0.0921805541 -0.7296348849
H -0.091618728 -1.2726168074 1.2636112501
H 2.524339291 -1.436103097 1.4358533233
H 3.540973502 -0.0358525828 -0.3531470761
H 1.492175797 0.3509602227 -1.7286758296
H -0.8939703856 0.1856252127 1.9910248262
H 1.3574090245 -1.1822863577 -0.8550630618
H 2.6556500591 1.3846210174 0.2118519691
H 3.3859069749 -0.0621010327 2.1491667967
H 1.2785176272 1.0069756379 2.7986931493
H -0.7924592513 -0.1526970364 -0.611399877
O -0.1125918902 1.6934360161 -0.0597976299
O -0.0305616707 2.3880668492 -1.7613844865
H -0.8703996822 2.847783256 -1.5972408262
*****
```

cyC6OOH-3\_eq-> epocyC6-3 + OH



|           |           |           |
|-----------|-----------|-----------|
| 99.3929   | 200.9739  | 287.3218  |
| 318.3224  | 383.5289  | 401.1855  |
| 548.1758  | 572.7482  | 669.9623  |
| 787.5358  | 808.1067  | 833.0843  |
| 854.2683  | 889.4013  | 902.1573  |
| 930.8014  | 981.6060  | 1028.8123 |
| 1045.4342 | 1098.7953 | 1101.3527 |
| 1118.3423 | 1157.7859 | 1211.4047 |
| 1214.1592 | 1252.5935 | 1274.6714 |
| 1319.9352 | 1328.1979 | 1340.3873 |
| 1344.1200 | 1370.0463 | 1393.0234 |
| 1480.1375 | 1489.6030 | 1501.2281 |
| 1514.5222 | 2982.0719 | 2990.4740 |
| 3056.6465 | 3062.1167 | 3098.2073 |
| 3099.0433 | 3116.6599 | 3118.5616 |
| 3123.7751 | 3205.6773 | 3787.5264 |

ROTATIONAL CONSTANTS (GHZ)      2.93274    1.77397    1.59030

\*\*\*\*\*

cyC6OOH-3\_eq-> C6H10 + HO2

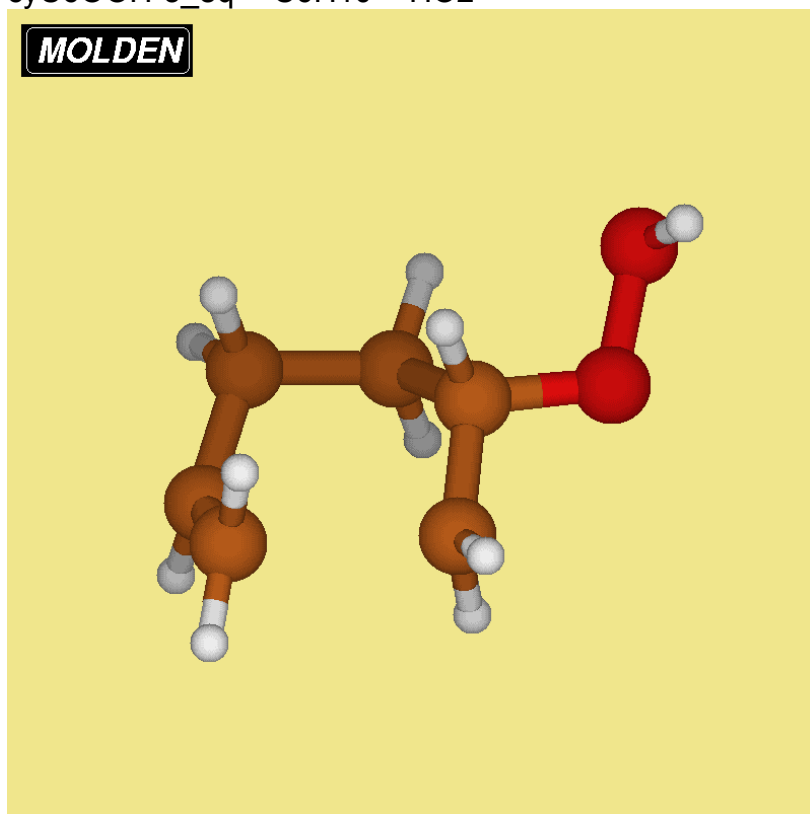

C -0.0112894239 0.0345395374 -0.0248239996  
C -0.0867384569 1.5619650803 0.1066751671  
C 0.180205292 2.0567802822 1.5515402276

C -0.8409779547 1.4752133885 2.4871139106  
C -0.7891900215 0.1657473719 2.8478778592  
C -1.096161164 -0.7125863734 0.6887838977  
H -1.0786135263 1.8912369121 -0.2270202267  
H -1.5913673471 -0.2989139095 3.4134518359  
H -0.9506724128 -1.7745229896 0.8662049046  
H 0.6472176301 1.9996521036 -0.5760994912  
H -2.1205436818 -0.4031987813 0.5038068993  
H 0.1512846318 -0.3783623144 2.8320599826  
H -1.7623386997 2.0345988056 2.6413315202  
H 0.1631850677 3.1515609841 1.5685410972  
O -0.1558401087 -0.3636931202 -1.4127747236  
O 1.0140714822 0.1304360405 -2.148642201  
H 0.9756929925 -0.3139631616 0.3176324126  
H 1.1908798807 1.7480645433 1.8511764515  
H 1.4608638204 -0.7136333995 -2.3236595238

Frequencies:

|           |           |           |
|-----------|-----------|-----------|
| -387.8978 | 85.3809   | 139.4633  |
| 195.4549  | 216.6609  | 256.4260  |
| 296.8283  | 350.9335  | 405.6912  |
| 433.3988  | 484.1116  | 515.1977  |
| 538.2764  | 697.2121  | 760.1860  |
| 816.5756  | 858.3001  | 866.7988  |
| 921.4335  | 934.6034  | 949.5731  |
| 972.7391  | 987.6101  | 1005.7696 |
| 1033.0012 | 1134.3682 | 1170.0327 |
| 1237.5277 | 1243.1789 | 1295.8839 |
| 1327.4454 | 1336.1950 | 1341.8478 |
| 1364.2623 | 1403.1337 | 1446.9286 |
| 1476.0587 | 1502.0426 | 1510.0157 |
| 1608.9117 | 2994.7680 | 3031.7010 |
| 3050.8423 | 3088.7780 | 3113.2718 |
| 3144.7033 | 3149.4051 | 3161.5515 |
| 3235.0050 | 3244.1417 | 3757.1188 |

ROTATIONAL CONSTANTS (GHZ)      3.91347    1.26144    1.03400

\*\*\*\*\*

cyC6OOH-3\_ax-> C6H10 + HO2

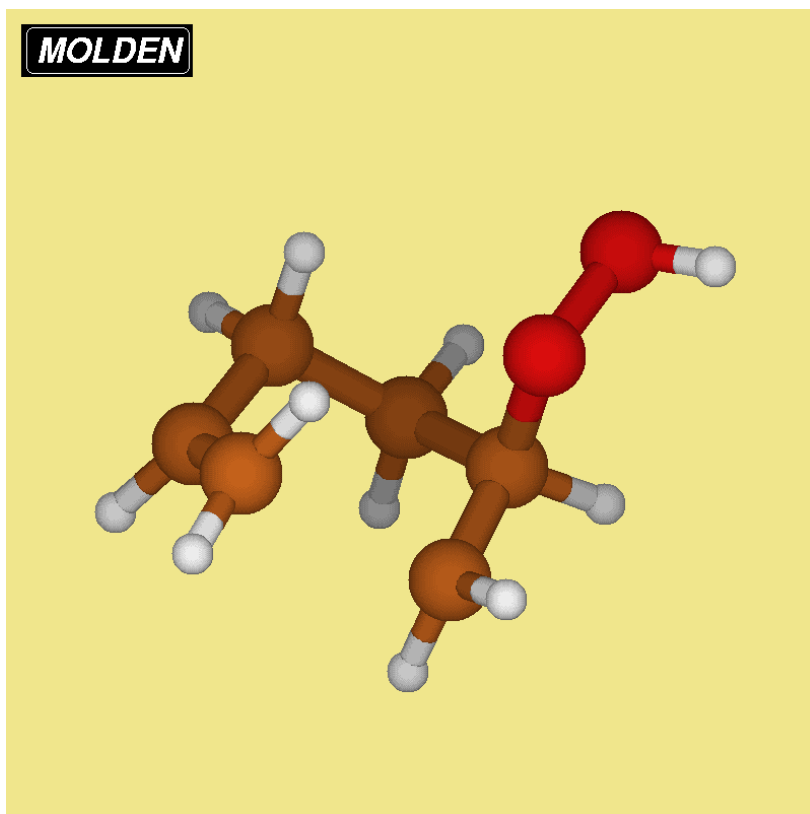

```
C 0.3292089568 -1.5092600153 0.7983766661
C -0.6671571606 -0.3905371169 0.7348738296
C -0.0796377307 1.0242221673 0.9026348433
C 0.8919145608 1.4338351398 -0.2335922549
C 2.0354101675 0.4641189642 -0.318724709
C 1.8485500614 -0.7807189778 -0.8331195609
O -1.3211295034 -0.5505638397 -0.541634177
O -2.4544366397 0.3618204322 -0.5782894841
H 0.4324199872 1.0641472958 1.8728218328
H 2.6306856756 -1.5332809459 -0.7884112297
H 0.0013986719 -2.4816082089 0.4403154345
H -0.9088378585 1.737079982 0.9470781959
H 0.9903429852 -1.5193869712 1.6586574572
H 1.0371868013 -0.9749196832 -1.5273395769
H 2.9238983035 0.6709560589 0.2765712066
H 1.2422583618 2.4553632036 -0.0488904349
H -1.4397690849 -0.5283848292 1.5160248635
H -3.1839616573 -0.2764116218 -0.51694549
H 0.3291738272 1.4464320122 -1.173185856
```

Frequencies:

|           |          |          |
|-----------|----------|----------|
| -416.5159 | 85.2228  | 119.9305 |
| 188.8429  | 225.0641 | 277.3294 |
| 305.5579  | 324.8532 | 392.5782 |



|           |           |           |
|-----------|-----------|-----------|
| 442.9122  | 503.3146  | 541.0182  |
| 617.4048  | 701.8407  | 722.9887  |
| 810.5467  | 854.0868  | 892.7860  |
| 930.4404  | 941.3084  | 953.3383  |
| 957.5353  | 980.1361  | 1010.3408 |
| 1054.3327 | 1137.9259 | 1151.5234 |
| 1222.5402 | 1244.5287 | 1297.4343 |
| 1324.5728 | 1333.9031 | 1359.1095 |
| 1375.1082 | 1384.4009 | 1443.4747 |
| 1456.1587 | 1492.0389 | 1506.6002 |
| 1604.4659 | 2912.7176 | 3043.5602 |
| 3052.6720 | 3096.6386 | 3103.2943 |
| 3145.8365 | 3149.8235 | 3158.8969 |
| 3242.4292 | 3247.1197 | 3752.3669 |

Rotational constants (GHZ):      3.03000    1.56868    1.35762

\*\*\*\*\*

beta decomposition paths: involve the formation of an intermediate state

\*\*\*\*\*

\*\*\*\*\*

cyC6OOH-1\_eq -> inter1 (TST)

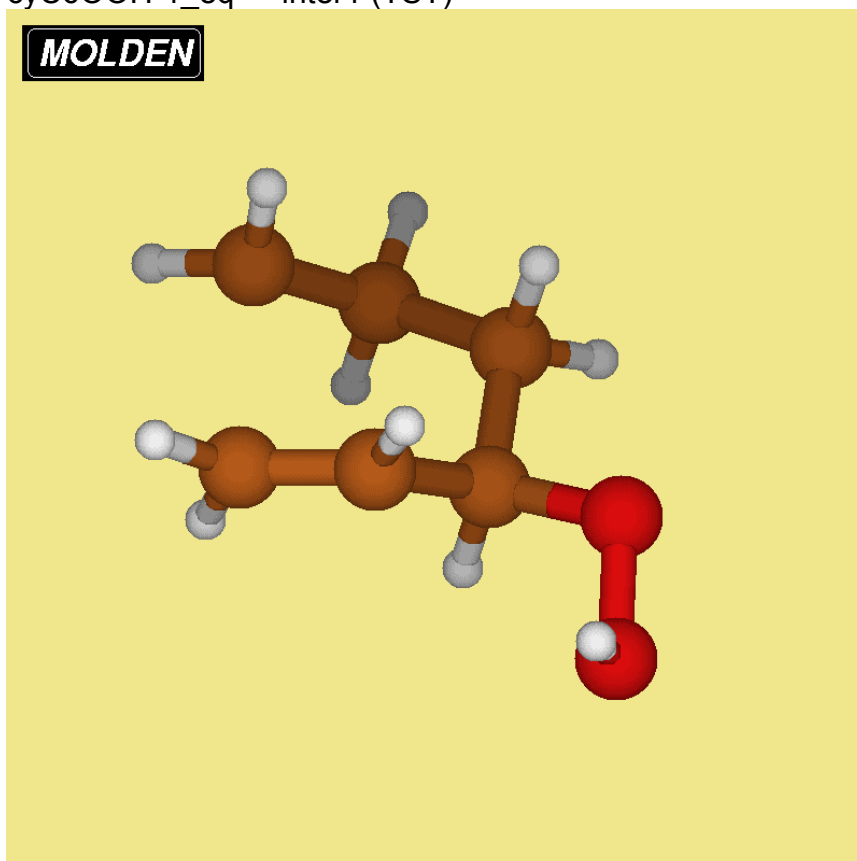

C -0.4158386889 0.2799052341 -0.4425622828  
C -0.4966689627 0.1817486603 1.0528108416  
C 0.5288023801 0.6287960163 1.8216713876  
C 2.1580248338 -0.8618551002 1.0065185466  
C 1.9745326374 -0.6559391411 -0.4712942997  
C 0.5287879088 -0.8116154462 -0.989433176  
H -1.2164172906 -0.5332253244 1.4506080657  
H 1.7752752999 -1.7811429004 1.4430407829  
H 2.6006342681 -1.3770088993 -1.0243477961  
H 0.5185495154 -0.7587454289 -2.0835373954  
H 0.1328043275 -1.7957642805 -0.7097290203  
H 2.3547163814 0.3343267839 -0.7581755069  
H 3.0650968731 -0.4783030583 1.4675415034  
H 0.5625846291 0.4361635183 2.8894941238  
O -1.6700608486 0.0441602228 -1.0878806194  
O -2.5243972974 1.1888118588 -0.8101664607  
H -0.0382784807 1.2662072087 -0.7479151622  
H 1.1896602538 1.4132471699 1.4637423593  
H -3.0548012592 0.8442272193 -0.072611417

Frequencies:

|           |           |           |
|-----------|-----------|-----------|
| -412.4586 | 91.2891   | 120.9012  |
| 178.1603  | 218.6955  | 243.8572  |
| 307.2765  | 310.4094  | 375.1582  |
| 450.4740  | 472.4911  | 511.4788  |
| 569.5160  | 677.2725  | 740.4207  |
| 827.2026  | 871.6593  | 890.4633  |
| 920.2664  | 931.0793  | 942.7569  |
| 972.9508  | 998.6641  | 1065.5784 |
| 1080.2117 | 1119.5080 | 1170.9932 |
| 1228.3543 | 1241.4142 | 1282.1517 |
| 1314.0158 | 1351.4529 | 1359.4791 |
| 1366.1512 | 1378.0628 | 1452.4145 |
| 1474.3322 | 1486.9496 | 1505.7786 |
| 1603.0847 | 2966.7859 | 3021.8930 |
| 3035.3978 | 3049.5016 | 3096.0989 |
| 3132.1926 | 3148.6961 | 3155.7302 |
| 3226.1102 | 3238.1436 | 3746.8344 |

Rotational constants (GHZ): 3.64047 1.33511 1.05324

\*\*\*\*\*

inter1: CH<sub>2</sub>CH<sub>2</sub>CH<sub>2</sub>CH(OOH)CHCH<sub>2</sub>

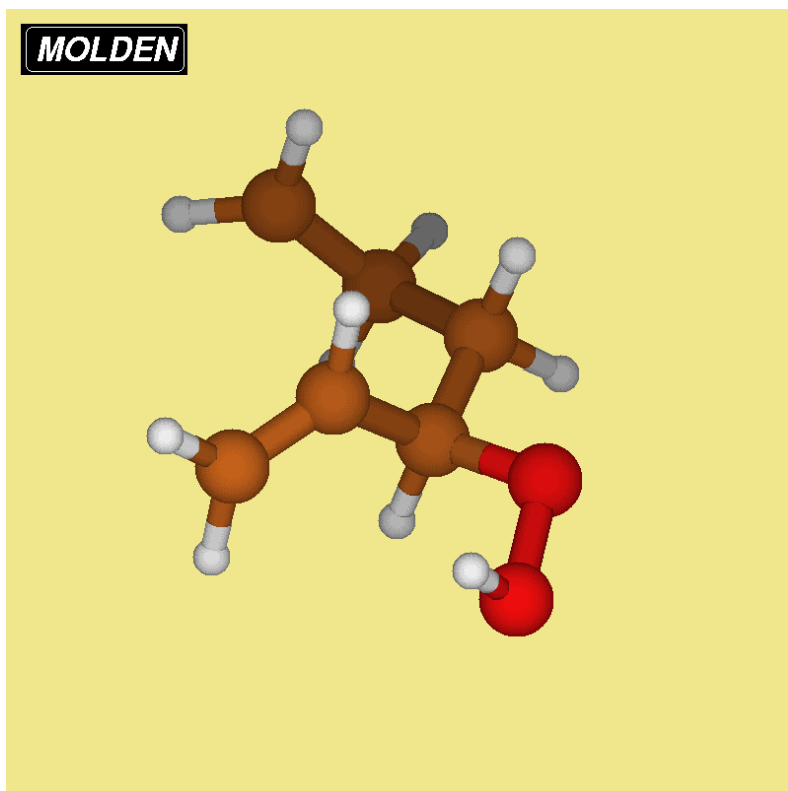

```
C 0.2122574409 -0.1025538988 0.038970166
C 0.120940748 -0.2127263918 1.5391067403
C 0.1893109712 0.8300467502 2.3697360836
C 2.8734995551 -1.5923082457 1.0935843738
C 2.5371404238 -1.160817149 -0.2938821098
C 1.0329194168 -1.2057112381 -0.6377568938
H -0.0872426756 -1.2084799064 1.9293013094
H 2.4746573123 -2.5221671857 1.4881093151
H 3.0512510929 -1.8136009188 -1.0214207945
H 0.8971046196 -1.0968478981 -1.7189591584
H 0.617471845 -2.183620542 -0.3630445455
H 2.9255031338 -0.1521139222 -0.4819049453
H 3.6192794718 -1.0744880733 1.6853544393
H 0.0715276066 0.7171369255 3.4435655607
O -1.1080785895 -0.2426204927 -0.5313497757
O -1.8594017946 0.9562473223 -0.22429293
H 0.6012683417 0.8844722286 -0.243550981
H 0.3875527621 1.8340930859 2.0026825223
H -2.1429446821 0.7751485501 0.6897356236
```

Frequencies:

|          |          |          |
|----------|----------|----------|
| 50.1080  | 85.3991  | 105.9627 |
| 131.8082 | 165.0357 | 190.9811 |
| 257.8850 | 276.1037 | 309.1159 |

|           |           |           |
|-----------|-----------|-----------|
| 365.9095  | 433.4350  | 453.2773  |
| 505.9366  | 509.9640  | 707.1351  |
| 806.7406  | 848.1931  | 910.6791  |
| 927.0488  | 950.0767  | 955.7534  |
| 1005.2337 | 1027.5065 | 1033.6464 |
| 1095.4805 | 1125.5953 | 1182.1782 |
| 1231.9923 | 1253.5407 | 1316.6627 |
| 1323.1807 | 1367.4103 | 1370.0088 |
| 1384.9663 | 1393.4639 | 1469.3643 |
| 1475.1066 | 1486.4674 | 1510.2541 |
| 1714.4519 | 2954.7331 | 3039.3516 |
| 3045.7556 | 3061.0132 | 3097.3720 |
| 3147.5402 | 3156.9712 | 3159.7050 |
| 3236.9012 | 3263.7539 | 3706.3561 |

Rotational constants (GHZ):      3.04011    1.33842    1.00504

\*\*\*\*\*

inter1 -> C2H4 + C4H6 + HO2

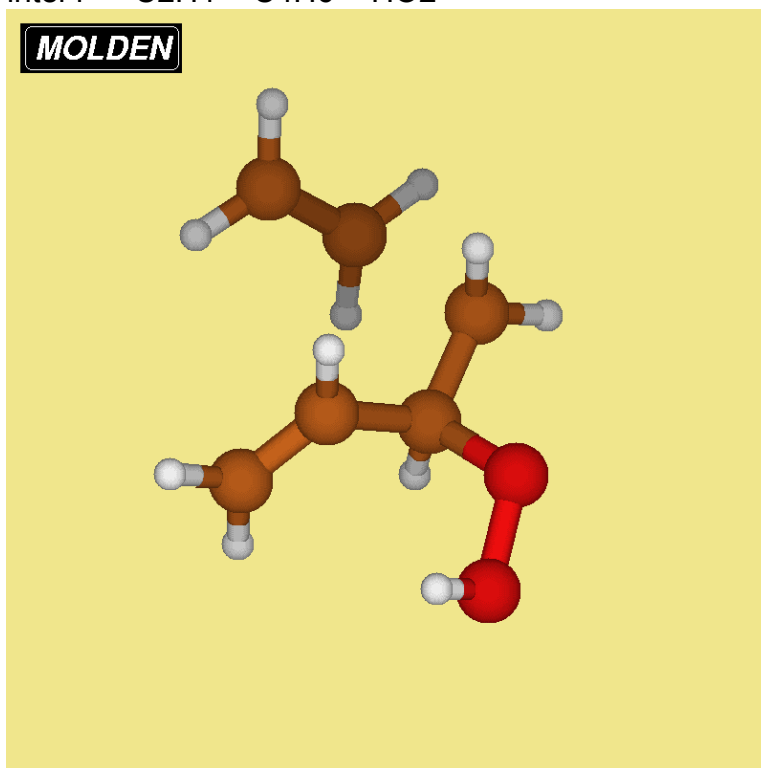

|   |         |          |          |
|---|---------|----------|----------|
| C | 0.05093 | -0.11709 | -0.00633 |
| C | 0.00783 | -0.21482 | 1.49587  |
| C | 0.19405 | 0.81931  | 2.31808  |
| C | 3.19226 | -1.67919 | 1.08449  |
| C | 2.96699 | -1.18884 | -0.16223 |
| C | 0.6969  | -1.28694 | -0.67491 |

|   |          |          |          |
|---|----------|----------|----------|
| H | -0.24919 | -1.19436 | 1.89845  |
| H | 3.36716  | -2.73744 | 1.25487  |
| H | 3.14888  | -1.8045  | -1.03749 |
| H | 0.81507  | -1.22355 | -1.75284 |
| H | 0.47514  | -2.27663 | -0.2872  |
| H | 2.93092  | -0.11787 | -0.33669 |
| H | 3.13257  | -1.04488 | 1.96282  |
| H | 0.11354  | 0.71651  | 3.39644  |
| O | -1.31639 | -0.09976 | -0.52345 |
| O | -1.89775 | 1.19519  | -0.20464 |
| H | 0.51853  | 0.8261   | -0.31567 |
| H | 0.44769  | 1.80616  | 1.93867  |
| H | -2.18111 | 1.05169  | 0.71574  |

Frequencies:

|           |           |           |
|-----------|-----------|-----------|
| -355.0916 | 33.9768   | 67.1899   |
| 81.5530   | 114.1080  | 161.9539  |
| 217.1348  | 243.4774  | 290.8695  |
| 336.4195  | 364.5774  | 384.1976  |
| 435.5252  | 525.3320  | 558.4195  |
| 713.5227  | 776.2261  | 825.8076  |
| 859.3038  | 872.5635  | 893.6409  |
| 919.4228  | 957.0070  | 974.3078  |
| 1000.9946 | 1024.3853 | 1032.1803 |
| 1139.0602 | 1206.0028 | 1243.8278 |
| 1311.5764 | 1316.4901 | 1321.7223 |
| 1360.6603 | 1374.2247 | 1471.5942 |
| 1476.9120 | 1480.8568 | 1600.6857 |
| 1719.1970 | 3045.0967 | 3145.5676 |
| 3147.2316 | 3153.4439 | 3158.1289 |
| 3162.4266 | 3232.7598 | 3236.4282 |
| 3246.2898 | 3258.3276 | 3712.5004 |

Rotational constants (GHZ): 3.06777 1.11320 0.88614

\*\*\*\*\*

inter1 -> Htrasp

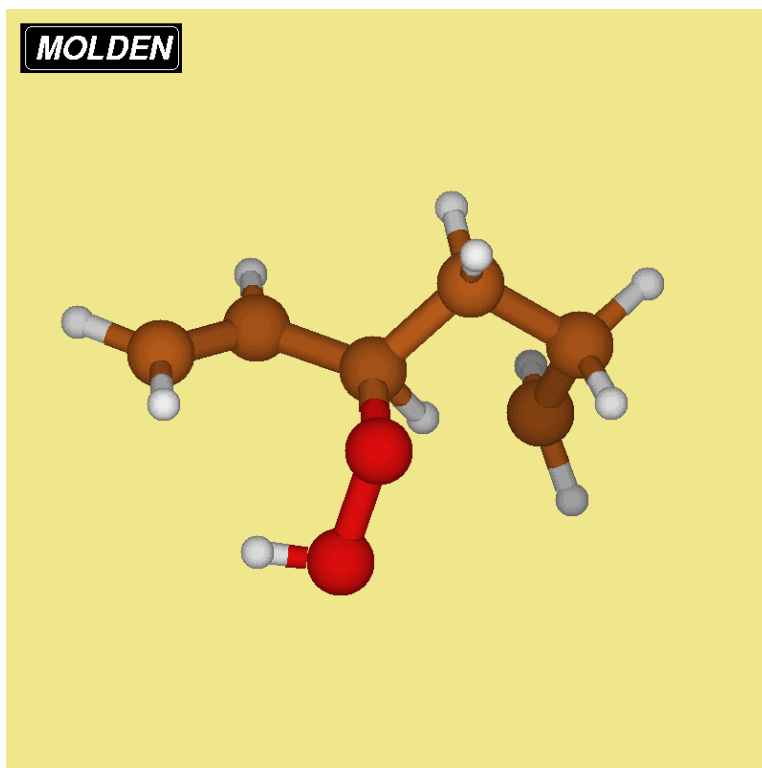

```
C 0.5221233167 -0.389804071 0.6453701773
C -0.233379023 -0.4649972978 1.9093579677
C -1.3703377051 0.1964548078 2.1785083844
C 3.0118020727 -0.5899192902 0.2156160733
C 2.2208464118 -1.4089539694 -0.7872649903
C 0.8524311337 -1.6786999999 -0.1141900258
H 0.209060301 -1.101670311 2.6752079312
H 3.4867155964 -1.1363243686 1.0319112658
H 2.7221445443 -2.3424080173 -1.0693022648
H 0.0599694495 -1.9505674665 -0.8196087642
H 0.9355666023 -2.4931890622 0.6153493041
H 2.0647093468 -0.8287256647 -1.7011322804
H 3.5879755793 0.2631564501 -0.1350353836
H -1.8582730751 0.1171490036 3.1439512167
O 0.0457615004 0.5603939985 -0.2789919577
O 0.4519965918 1.8956273051 0.1529323374
H 1.7845845392 -0.0955446276 0.8361155488
H -1.8702211376 0.7966395372 1.4225837419
H -0.2094590451 2.080473044 0.8426067184
```

Frequencies:

|            |          |          |
|------------|----------|----------|
| -1744.3182 | 94.2106  | 104.7935 |
| 163.5747   | 173.0359 | 219.7028 |
| 276.6183   | 296.7822 | 314.2311 |
| 400.4605   | 470.8687 | 511.3222 |

|           |           |           |
|-----------|-----------|-----------|
| 594.2408  | 637.8209  | 698.1185  |
| 807.4574  | 856.4910  | 888.3710  |
| 899.6778  | 911.9389  | 935.3171  |
| 989.7492  | 1001.5129 | 1020.1211 |
| 1048.0470 | 1071.6322 | 1136.3634 |
| 1205.4757 | 1220.5298 | 1261.7780 |
| 1318.1785 | 1333.4786 | 1348.8380 |
| 1378.6573 | 1410.9742 | 1454.2981 |
| 1468.2524 | 1488.2248 | 1507.0332 |
| 1621.5291 | 1665.6702 | 3050.3641 |
| 3056.5894 | 3097.6218 | 3109.5343 |
| 3116.3795 | 3150.1753 | 3158.0612 |
| 3210.4395 | 3246.0001 | 3720.9393 |

Rotational constants (GHZ):      2.95416    1.46648    1.20360

\*\*\*\*\*

cyC6OOH-2 -> inter2 (TST)

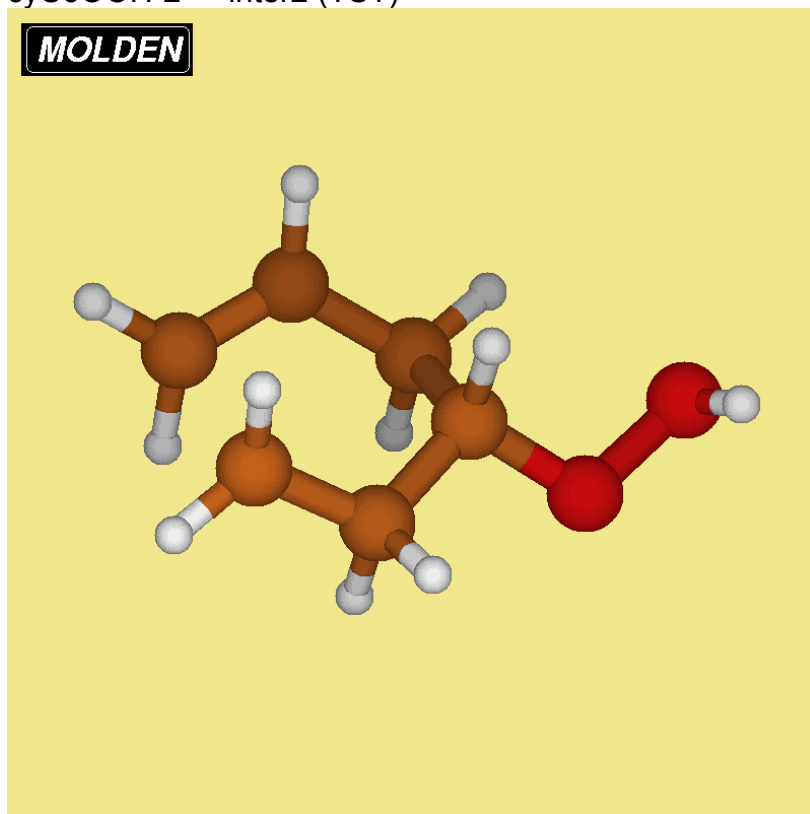

|   |         |          |          |
|---|---------|----------|----------|
| C | 0.11937 | 0.28532  | -0.09438 |
| C | 0.01445 | -0.29707 | 1.33397  |
| C | 1.16936 | 0.19074  | 2.15938  |
| C | 2.41761 | -0.31288 | 1.96948  |
| C | 2.66899 | 0.38273  | -0.26212 |
| C | 1.39188 | -0.15541 | -0.84238 |

|   |          |          |          |
|---|----------|----------|----------|
| H | 0.02269  | -1.39076 | 1.24568  |
| H | 2.55827  | -1.30808 | 1.55715  |
| H | 3.59502  | -0.11095 | -0.54564 |
| H | 1.27678  | 0.16885  | -1.89052 |
| H | -0.95015 | -0.00395 | 1.75664  |
| H | 1.41707  | -1.25253 | -0.87192 |
| H | 2.74839  | 1.4565   | -0.11413 |
| H | 3.28249  | 0.11527  | 2.46783  |
| H | 1.04755  | 1.12738  | 2.7006   |
| O | -0.95247 | -0.17384 | -0.92762 |
| O | -2.19548 | 0.36478  | -0.39311 |
| H | -2.40263 | 1.01699  | -1.08241 |
| H | 0.08291  | 1.38454  | -0.04666 |

Frequencies:

|           |           |           |
|-----------|-----------|-----------|
| -417.8488 | 105.3185  | 125.6443  |
| 181.1556  | 207.7305  | 242.2161  |
| 295.6237  | 352.0518  | 400.9752  |
| 443.7730  | 465.0365  | 506.8150  |
| 539.2275  | 674.8196  | 736.8322  |
| 831.9042  | 866.7239  | 922.6831  |
| 930.2497  | 931.7066  | 963.9381  |
| 973.1459  | 1021.8205 | 1029.9613 |
| 1069.9910 | 1105.3483 | 1174.8128 |
| 1212.9800 | 1265.5972 | 1284.8014 |
| 1300.3447 | 1322.2261 | 1360.1975 |
| 1388.6494 | 1396.6540 | 1444.3726 |
| 1475.2027 | 1490.6822 | 1508.0700 |
| 1604.7414 | 2972.5910 | 3003.5855 |
| 3045.5927 | 3055.4099 | 3116.3322 |
| 3135.3093 | 3148.6876 | 3162.0517 |
| 3229.5057 | 3234.3939 | 3751.9319 |

Rotational constants (GHZ): 3.50200 1.36866 1.06273

\*\*\*\*\*

inter 2: CH<sub>2</sub>CH<sub>2</sub>CH(OOH)CH<sub>2</sub>CHCH<sub>2</sub>



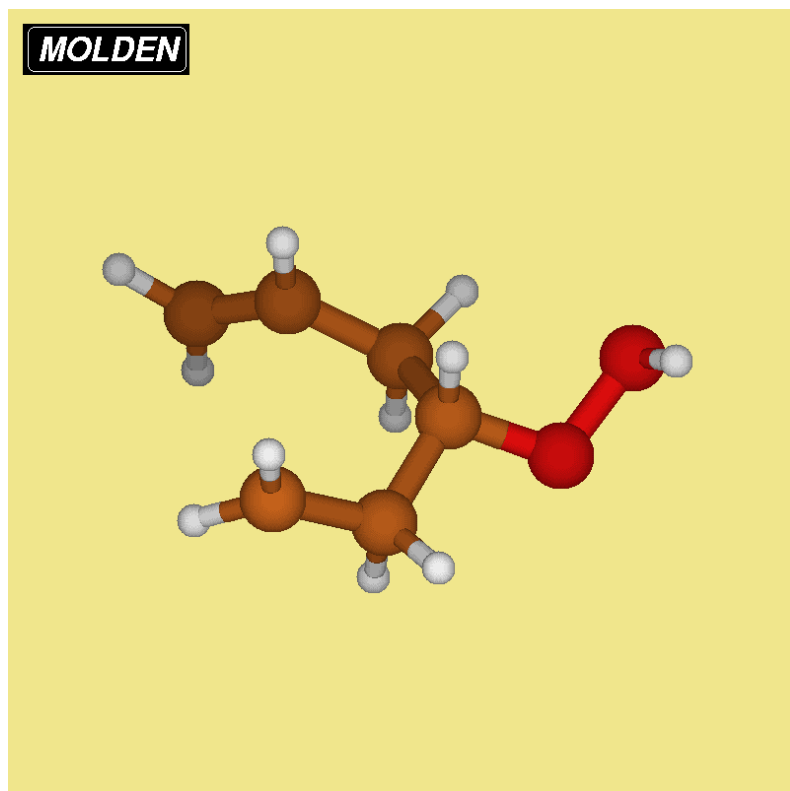

|   |   |          |          |          |
|---|---|----------|----------|----------|
| C | 0 | 0.16065  | 0.30312  | -0.19888 |
| C | 0 | 0.24776  | -0.3358  | 1.19572  |
| C | 0 | 1.36156  | 0.1944   | 2.05356  |
| C | 0 | 2.2584   | -0.55376 | 2.69876  |
| C | 0 | 2.61308  | 0.598    | -0.79468 |
| C | 0 | 1.32653  | -0.06747 | -1.14566 |
| H | 0 | 0.3324   | -1.423   | 1.08275  |
| H | 0 | 2.25952  | -1.63822 | 2.61891  |
| H | 0 | 3.46247  | 0.03763  | -0.42596 |
| H | 0 | 1.00729  | 0.22695  | -2.157   |
| H | 0 | -0.71252 | -0.13711 | 1.68837  |
| H | 0 | 1.43751  | -1.1571  | -1.15335 |
| H | 0 | 2.70523  | 1.67794  | -0.85528 |
| H | 0 | 3.02073  | -0.11103 | 3.33265  |
| H | 0 | 1.39807  | 1.2781   | 2.17297  |
| O | 0 | -1.00845 | -0.15483 | -0.89475 |
| O | 0 | -2.17913 | 0.33801  | -0.18247 |
| H | 0 | -2.48332 | 1.01325  | -0.81107 |
| H | 0 | 0.10434  | 1.39856  | -0.10476 |

Frequencies:

|          |          |          |
|----------|----------|----------|
| 55.4286  | 91.5263  | 97.8925  |
| 119.3182 | 134.4098 | 186.8603 |
| 209.3216 | 241.1267 | 312.6097 |

|           |           |           |
|-----------|-----------|-----------|
| 375.8925  | 427.9999  | 459.0944  |
| 485.9994  | 542.7672  | 624.2568  |
| 794.9939  | 866.9984  | 924.3965  |
| 930.8844  | 936.1891  | 963.2998  |
| 1024.0361 | 1029.6458 | 1065.5796 |
| 1081.9635 | 1104.7633 | 1181.4350 |
| 1230.7030 | 1273.5503 | 1302.2107 |
| 1314.4426 | 1333.8563 | 1359.4418 |
| 1372.6847 | 1406.7078 | 1465.4935 |
| 1479.8103 | 1489.1828 | 1500.0048 |
| 1721.9977 | 3001.4144 | 3004.4985 |
| 3041.1965 | 3085.4530 | 3090.0639 |
| 3136.2520 | 3151.3346 | 3166.0751 |
| 3235.2591 | 3277.7087 | 3750.2409 |

Rotational constants (GHZ):      2.66799    1.35474    0.97506

\*\*\*\*\*

inter 2 -> C4H6O + C2H4 + OH

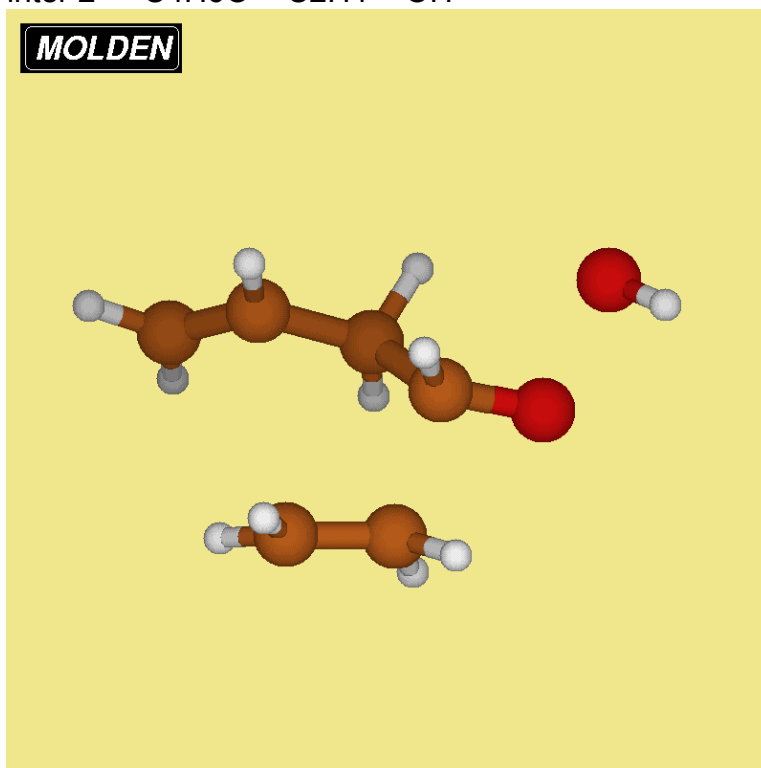

|   |              |               |               |
|---|--------------|---------------|---------------|
| C | 0.0517807821 | 0.3594228432  | -0.1357609268 |
| C | 0.2857020643 | -0.3601432987 | 1.1897392845  |
| C | 1.3527629076 | 0.226935199   | 2.0637198546  |
| C | 2.2948859727 | -0.4676563816 | 2.7052349556  |
| C | 2.6843112973 | 0.4161438612  | -0.7887241863 |
| C | 1.4853124178 | -0.0451425302 | -1.3442408767 |

H 0.4470215567 -1.4294052425 1.0153041011  
H 2.3684986291 -1.5488485886 2.6130085965  
H 3.2756234539 -0.1984454383 -0.1210558397  
H 1.0908028481 0.4969597081 -2.1994763504  
H -0.6871878315 -0.2696566268 1.6973012678  
H 1.341988087 -1.1210662888 -1.4080975428  
H 2.9891428965 1.4529215225 -0.8968818951  
H 3.0173284162 0.0159178694 3.3557956877  
H 1.3120691845 1.30853848 2.2016415916  
O -0.9412700692 -0.0728258433 -0.8664120102  
O -2.4379246652 0.4473658725 -0.0336980217  
H -2.7833476949 0.8237649606 -0.8601633397  
H 0.1646257469 1.4528569223 -0.0673963501

Frequencies:

|           |           |           |
|-----------|-----------|-----------|
| -832.5274 | 52.3193   | 76.9144   |
| 89.9745   | 103.7250  | 146.6838  |
| 153.3366  | 197.7470  | 251.4163  |
| 302.9095  | 359.7067  | 393.5133  |
| 418.5968  | 480.1942  | 509.8533  |
| 619.8158  | 811.8036  | 821.9935  |
| 881.2225  | 917.5463  | 940.0488  |
| 943.5497  | 961.8356  | 1030.3766 |
| 1049.1735 | 1053.9726 | 1129.5360 |
| 1166.3413 | 1210.8386 | 1248.4096 |
| 1256.8588 | 1290.8162 | 1316.9411 |
| 1336.7202 | 1438.7610 | 1459.3297 |
| 1477.8828 | 1483.8825 | 1554.4625 |
| 1721.6064 | 2998.1733 | 3018.6227 |
| 3088.7999 | 3135.3546 | 3136.0786 |
| 3150.0165 | 3168.4328 | 3217.8245 |
| 3235.0723 | 3273.2779 | 3784.8470 |

Rotational constants (GHZ): 2.45220 1.30007 0.91208

\*\*\*\*\*

boat - chair transformations

\*\*\*\*\*

\*\*\*\*\*

cyC6OO\_eq\_boat

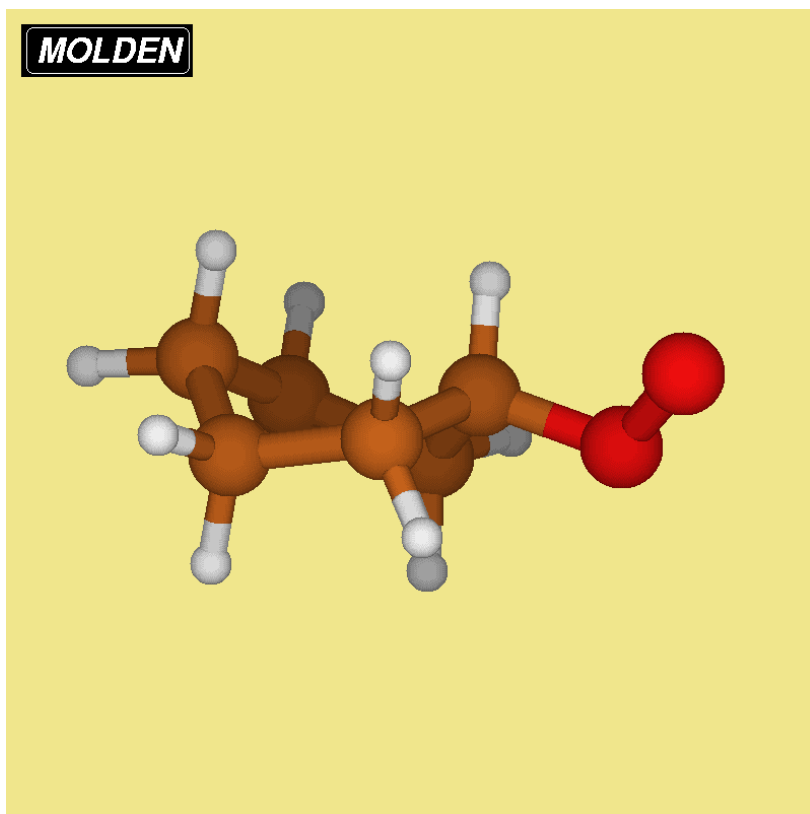

```
C -0.6189641532 -0.9975024967 0.4177169937
C 0.2954654103 -0.2370907288 -0.5590852337
C 0.0489767307 1.2652802568 -0.5200357497
C 0.4361195809 1.8297513299 0.8703287846
C 0.2225675146 0.8028087307 2.0095967898
C -0.9274733281 -0.1600407769 1.682624026
O 0.037398795 -0.6808775005 -1.9332559671
O 0.522139147 -1.8939842454 -2.1490824431
H -1.0123068241 1.4485394988 -0.7258672158
H 1.1407137323 0.2209218203 2.1633790244
H -1.1272556971 -0.826139887 2.5282996473
H -0.1461841139 -1.9484851983 0.6801194356
H 0.6149441814 1.7618570045 -1.3140285266
H -1.5477066434 -1.2412473754 -0.109464447
H -1.844637896 0.42209391 1.5281732212
H 0.0319982989 1.3246064059 2.9533563937
H -0.1597723708 2.7289600258 1.0602899288
H 1.48341077 2.1513806967 0.8606683108
H 1.3503424967 -0.4628308227 -0.3730921556
```

Frequencies:

|          |          |          |
|----------|----------|----------|
| 63.2762  | 78.6468  | 152.4901 |
| 237.2694 | 266.2536 | 365.5382 |
| 428.2232 | 467.0167 | 511.3600 |

|           |           |           |
|-----------|-----------|-----------|
| 582.9069  | 772.4447  | 793.1606  |
| 848.1418  | 896.9287  | 909.1240  |
| 931.1788  | 941.4171  | 1026.3675 |
| 1048.6662 | 1086.9452 | 1108.3999 |
| 1120.0392 | 1173.7536 | 1198.9213 |
| 1209.5616 | 1257.3281 | 1290.8364 |
| 1300.2618 | 1322.8801 | 1338.4543 |
| 1369.6799 | 1372.8782 | 1385.2126 |
| 1388.8535 | 1400.2697 | 1500.3293 |
| 1503.0534 | 1512.0179 | 1516.8487 |
| 1532.0703 | 3031.5257 | 3041.3656 |
| 3048.9429 | 3054.2992 | 3063.3471 |
| 3076.8815 | 3079.9365 | 3087.4687 |
| 3094.0674 | 3107.3130 | 3115.1442 |

Rotational constants (GHZ):        3.91935    1.39043    1.13893

\*\*\*\*\*

cyC6OO\_ax\_boat

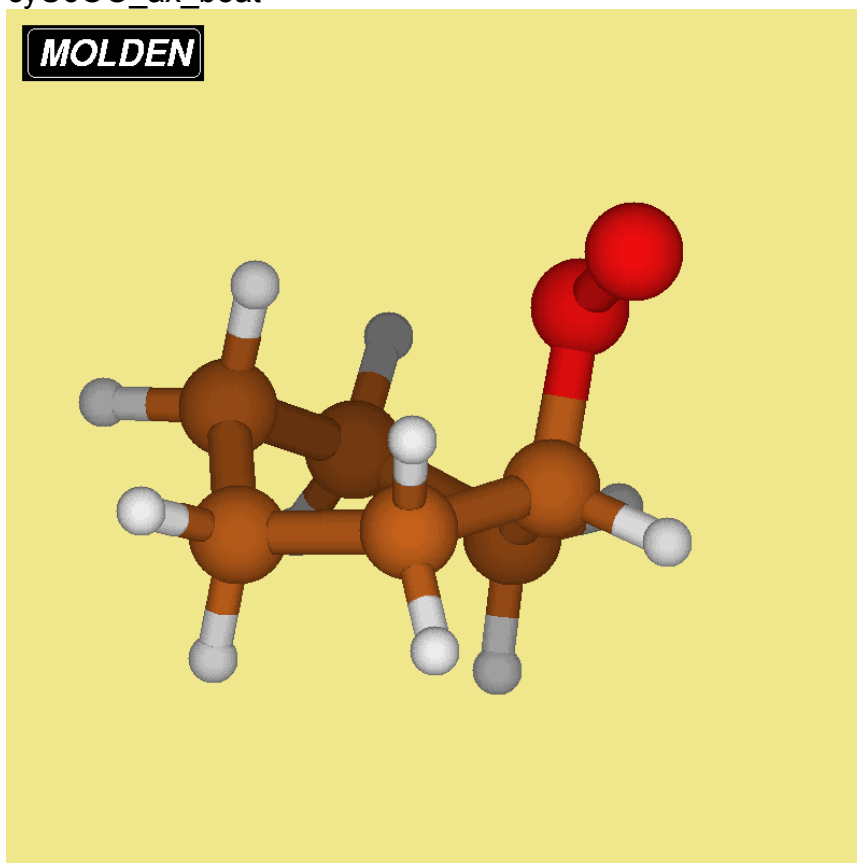

C -0.9915945551 -1.0376813091 0.0400912638  
C -0.1102709589 -0.3018095435 -0.9816057793  
C -0.2811452842 1.2119157674 -0.9286833677  
C 0.0442500022 1.7995543319 0.4683005018

C -0.1956461747 0.7892249618 1.6139974576  
C -1.3393221072 -0.175068709 1.2723637263  
O 1.3259515115 -0.5381481521 -0.7013172092  
O 1.6581790217 -1.8053066686 -0.8657240566  
H -1.3265048227 1.4147061421 -1.1910746764  
H 0.7170070049 0.207520558 1.7880302411  
H -1.5678670556 -0.8246102407 2.1239920224  
H -0.4599071794 -1.950346078 0.3274056243  
H 0.3308442383 1.6865397339 -1.7021406945  
H -1.9082941279 -1.3630160616 -0.4645296323  
H -2.2510153367 0.4048098487 1.0762634981  
H -0.4077792214 1.3244178613 2.5458177751  
H -0.5742847665 2.6911301517 0.6219095673  
H 1.08470583 2.137075059 0.4928160672  
H -0.2675743607 -0.6974014059 -1.9889424809

Frequencies:

|           |           |           |
|-----------|-----------|-----------|
| 78.2662   | 104.3510  | 144.2930  |
| 248.5237  | 297.7034  | 340.6635  |
| 445.1584  | 475.3686  | 537.2743  |
| 673.6364  | 768.2194  | 793.8095  |
| 808.8509  | 866.5097  | 878.9394  |
| 910.9039  | 937.1831  | 1011.7872 |
| 1046.3402 | 1056.6294 | 1114.5829 |
| 1136.4819 | 1161.1565 | 1186.1237 |
| 1211.4127 | 1272.8889 | 1276.0707 |
| 1303.5940 | 1341.0438 | 1352.0884 |
| 1356.6663 | 1369.5293 | 1390.8290 |
| 1395.1984 | 1397.9777 | 1491.6511 |
| 1495.5734 | 1506.3902 | 1511.7217 |
| 1525.2929 | 3031.3304 | 3046.8654 |
| 3049.1279 | 3057.2299 | 3057.8274 |
| 3082.3226 | 3084.9623 | 3091.3833 |
| 3096.0382 | 3106.2004 | 3109.4102 |

Rotational constants (GHZ): 3.03381 1.70613 1.47646

\*\*\*\*\*

cyC6OO\_eq\_boat\_O2lat

**MOLDEN**

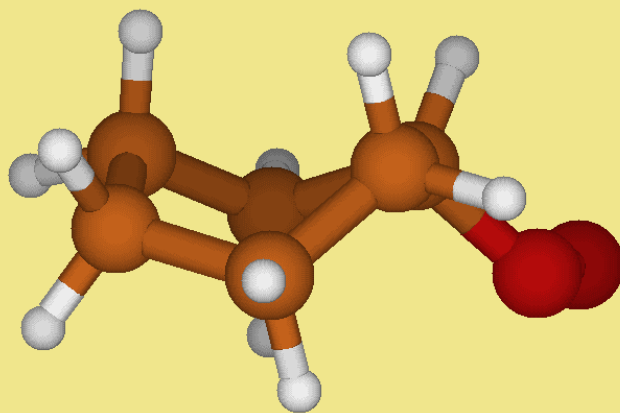

```
C 0.0146858358 -0.3533178523 -0.8027759499
C 0.0132081122 1.1827753073 -0.7741882784
C 0.1672935672 1.7293551511 0.6504167158
C -1.0029688771 1.2763516999 1.5552444242
C -1.534089201 -0.1272132013 1.1689640414
C -0.4361247306 -0.9837320352 0.5228546193
H -0.9300604024 1.5365271813 -1.2074273191
H -1.8225413446 2.0018063726 1.4964847512
H -2.371204664 -0.0312892022 0.4652707333
H 0.4318646219 -1.0389628784 1.1908832151
H 0.8115254398 1.5455283708 -1.4305101869
H -0.7673014833 -2.010961874 0.3512351608
H -1.9388067087 -0.6372685067 2.0490048337
H -0.6694747852 1.2746516117 2.5991388785
H 0.2338055611 2.8221328467 0.6328656196
H 1.1189846423 1.3728066877 1.0620277457
H -0.5770757301 -0.7333434643 -1.6410778902
O 1.4033304278 -0.7551248412 -1.0934719946
O 1.490201649 -2.050742854 -1.3429016274
```

Frequencies:

|          |          |          |
|----------|----------|----------|
| 55.2702  | 88.0821  | 179.1527 |
| 238.1416 | 296.0206 | 367.0223 |

|           |           |           |
|-----------|-----------|-----------|
| 405.4979  | 500.6039  | 534.5547  |
| 591.4893  | 774.4692  | 787.4213  |
| 825.1980  | 876.8806  | 895.9697  |
| 908.6838  | 969.1745  | 1018.2641 |
| 1033.4027 | 1082.3639 | 1115.1128 |
| 1138.2928 | 1150.5036 | 1195.8814 |
| 1206.4751 | 1247.6072 | 1278.3409 |
| 1303.5058 | 1331.3494 | 1344.4904 |
| 1362.9552 | 1381.4425 | 1382.6946 |
| 1392.4983 | 1393.0056 | 1489.7922 |
| 1501.4631 | 1507.4729 | 1517.0729 |
| 1528.1642 | 3033.4098 | 3042.3432 |
| 3048.5447 | 3050.7660 | 3056.8181 |
| 3076.1139 | 3082.5021 | 3090.5476 |
| 3094.9578 | 3101.2858 | 3117.8999 |

Rotational constants (GHZ):        3.87286    1.44004    1.18371

\*\*\*\*\*

cyC6OO->boat O2 cent envelope tst

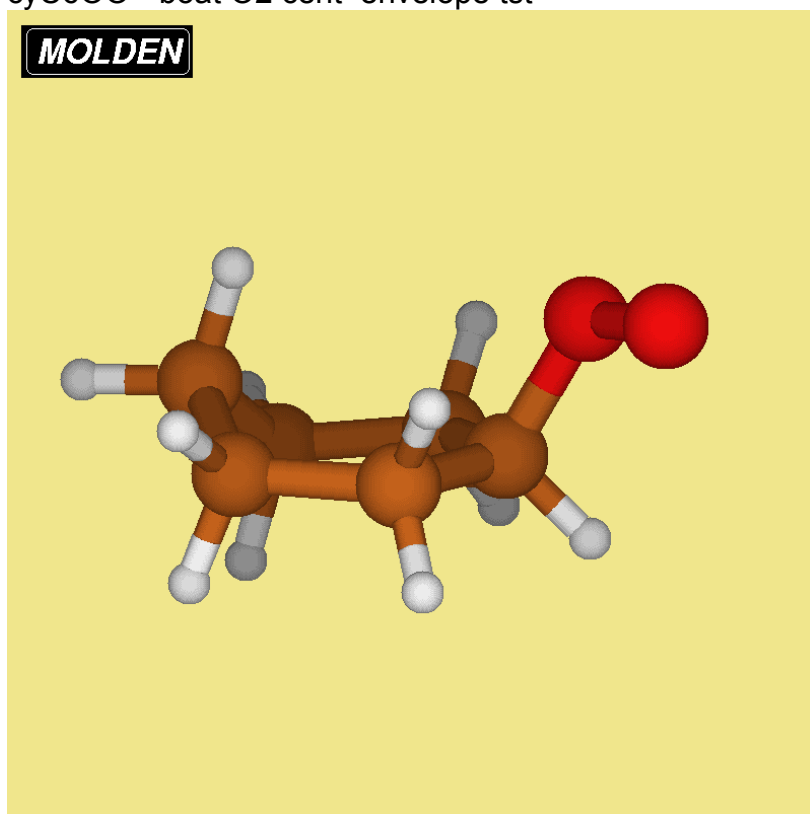

C 0.7361868376 -0.279308425 0.5027986813  
C -0.2761106878 -1.4340799577 0.3348279444  
C -1.7546873435 -1.0258050463 0.231840517  
C -1.9197539068 0.264161552 -0.5748572843



C -1.2699743564 1.4175433692 0.1946750191  
C 0.2277675181 1.1840522902 0.5035077242  
H -0.1368411614 -2.1599661444 1.1421418574  
H -2.9807472066 0.4796979487 -0.7442555344  
H -1.8220890332 1.5436235833 1.1349116314  
H 0.8516292439 1.7159245299 -0.2202043076  
H 0.0086133406 -1.9521540456 -0.588541956  
H 0.4698340122 1.6302258097 1.47301254  
H -1.3801617398 2.361025203 -0.3507583426  
H -1.4565100148 0.1502880128 -1.5648480389  
H -2.1774945521 -0.8692763565 1.2334201111  
H -2.3192413168 -1.851263927 -0.2155380511  
H 1.3753193539 -0.4421115964 1.3733469282  
O 1.6624811384 -0.4718859337 -0.6528156092  
O 2.7259089501 0.3012114697 -0.5758646968

Frequencies:

|           |           |           |
|-----------|-----------|-----------|
| -131.8632 | 49.1830   | 101.9106  |
| 283.4340  | 304.2341  | 369.8635  |
| 439.1402  | 470.1115  | 516.1411  |
| 637.3287  | 762.1901  | 770.2567  |
| 802.0352  | 873.5287  | 895.8515  |
| 911.6841  | 938.6304  | 1003.1947 |
| 1063.1302 | 1074.9541 | 1132.5418 |
| 1145.2736 | 1161.5208 | 1199.2450 |
| 1211.7963 | 1277.2548 | 1302.2385 |
| 1309.9289 | 1332.9981 | 1338.3824 |
| 1359.5009 | 1389.8452 | 1393.0902 |
| 1393.8630 | 1409.2022 | 1495.3875 |
| 1498.4506 | 1506.4489 | 1509.9292 |
| 1525.8992 | 3025.9430 | 3030.2835 |
| 3035.2891 | 3050.2589 | 3067.2269 |
| 3077.8317 | 3079.6712 | 3082.1376 |
| 3091.1212 | 3103.5074 | 3113.8693 |

Rotational constants (GHZ): 3.48317 1.50116 1.21669

\*\*\*\*\*

cyC6OO ->boat O2 lat envelope tst

**MOLDEN**

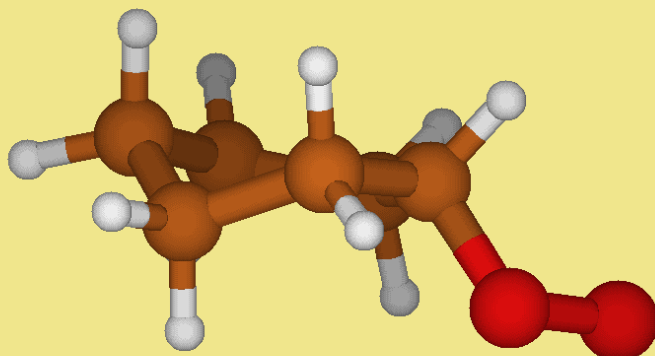

```
C 0.6933091973 -0.1743748347 0.5381224817
C -0.2863045766 -1.3508985591 0.4342506789
C -1.4798642499 -1.0783517921 -0.4838929661
C -2.2286784022 0.1517014533 0.0347335966
C -1.3640964105 1.4241098475 -0.0582331533
C 0.1715598204 1.2273582783 0.1304431856
H -0.6637295346 -1.5733797234 1.439990001
H -2.5133553825 -0.036664873 1.0791230977
H -1.7315371628 2.1612631737 0.6630129738
H 0.6736773471 1.4651487104 -0.8108233781
H 0.2812647992 -2.2315985371 0.1141646763
H 0.5513554129 1.9572624032 0.8491830546
H -1.5196249613 1.87272031 -1.0455488225
H -3.1636690902 0.3071140211 -0.5145593948
H -2.1374018375 -1.9545031516 -0.5026977537
H -1.1408891202 -0.9144082247 -1.5155739835
H 1.1488098981 -0.142383793 1.5312847245
O 1.8135341128 -0.5466224382 -0.3613343264
O 2.8339093074 0.2831428539 -0.2461779406
```

Frequencies:

|           |          |          |
|-----------|----------|----------|
| -187.8656 | 27.5114  | 84.4453  |
| 251.0767  | 304.7667 | 368.9936 |
| 430.0233  | 484.6172 | 528.5527 |

|           |           |           |
|-----------|-----------|-----------|
| 646.7137  | 749.5568  | 765.5749  |
| 810.1586  | 873.5740  | 894.6735  |
| 920.0993  | 939.7895  | 1003.9776 |
| 1053.4923 | 1089.4932 | 1131.5752 |
| 1142.5386 | 1162.4926 | 1201.3927 |
| 1212.9903 | 1283.4935 | 1299.8152 |
| 1307.0128 | 1322.8091 | 1351.9732 |
| 1362.7987 | 1381.5178 | 1391.9232 |
| 1396.1631 | 1406.1730 | 1490.6617 |
| 1496.6202 | 1508.2120 | 1512.6573 |
| 1528.1859 | 3023.9009 | 3035.9318 |
| 3043.5358 | 3048.0673 | 3075.3900 |
| 3081.3558 | 3084.2602 | 3086.2174 |
| 3091.0689 | 3094.1554 | 3124.1606 |

Rotational constants (GHZ):            3.75664    1.44716    1.15507

Boat;cyC6OO <-> cyC6H10 + HO2

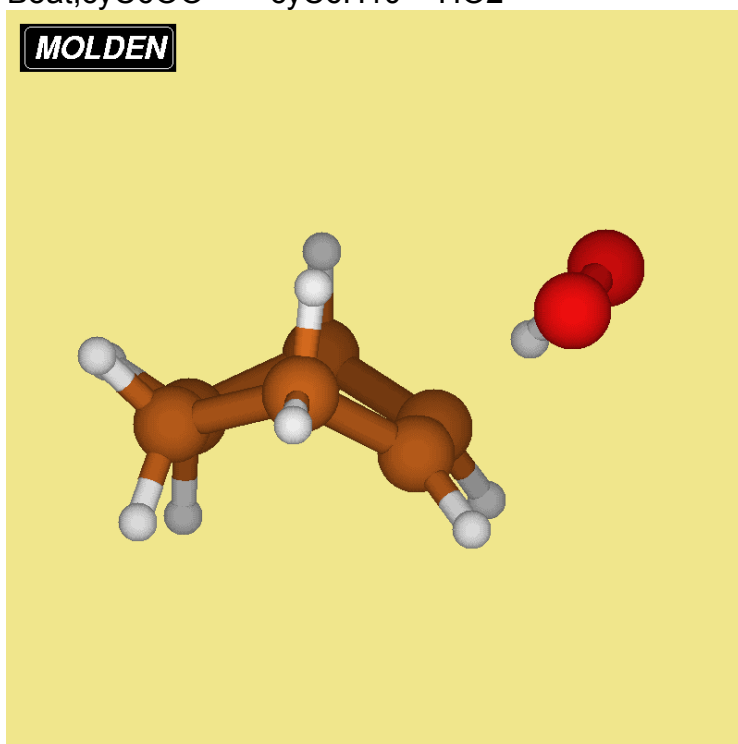

|   |           |           |           |
|---|-----------|-----------|-----------|
| C | -0.467596 | 1.363563  | -0.158958 |
| C | -0.825835 | -1.378746 | -0.295055 |
| C | 0.222703  | -0.862580 | 0.691446  |
| C | -1.963620 | 0.930183  | -0.181092 |
| C | -2.152523 | -0.609740 | -0.109846 |
| C | 0.312387  | 0.523546  | 0.808304  |

|   |           |           |           |
|---|-----------|-----------|-----------|
| H | 0.396630  | -1.453521 | 1.592876  |
| H | -2.485352 | 1.404371  | 0.656618  |
| H | -2.882125 | -0.938358 | -0.858137 |
| H | 0.759755  | 0.984144  | 1.682662  |
| H | -0.374837 | 2.429896  | 0.063096  |
| H | -0.984484 | -2.452784 | -0.158821 |
| H | -0.472880 | -1.250305 | -1.327056 |
| H | -0.051039 | 1.216679  | -1.162802 |
| H | 1.430215  | -0.995180 | 0.091082  |
| H | -2.418045 | 1.332509  | -1.092805 |
| H | -2.566134 | -0.882871 | 0.867588  |
| O | 2.506285  | -0.574571 | -0.426373 |
| O | 2.355616  | 0.675578  | -0.184015 |

---

|                             |            |           |           |
|-----------------------------|------------|-----------|-----------|
| Rotational constants (GHZ): | 3.6104559  | 1.3853980 | 1.1392515 |
| Frequencies --              | -1052.0676 | 83.8196   | 116.8609  |
| Frequencies --              | 148.9693   | 194.7057  | 258.8356  |
| Frequencies --              | 361.8920   | 460.6110  | 485.5358  |
| Frequencies --              | 564.4291   | 618.0004  | 681.1347  |
| Frequencies --              | 771.0640   | 819.4607  | 826.0221  |
| Frequencies --              | 891.9340   | 932.0062  | 955.3008  |
| Frequencies --              | 971.6127   | 984.1312  | 1040.0370 |
| Frequencies --              | 1069.7757  | 1126.3505 | 1138.0282 |
| Frequencies --              | 1204.1219  | 1231.1883 | 1264.4109 |
| Frequencies --              | 1272.2371  | 1287.9931 | 1328.5860 |
| Frequencies --              | 1337.4897  | 1344.5208 | 1369.6780 |
| Frequencies --              | 1383.4700  | 1409.5020 | 1493.0021 |
| Frequencies --              | 1504.8917  | 1510.0982 | 1525.2129 |
| Frequencies --              | 1549.4583  | 1597.7042 | 3032.3737 |
| Frequencies --              | 3043.7790  | 3046.6986 | 3058.1104 |
| Frequencies --              | 3079.3972  | 3094.7023 | 3100.5792 |
| Frequencies --              | 3112.4484  | 3123.8001 | 3210.2770 |
