# Supplementary material for: Theory, measurements, and modeling of OH and HO2 formation in the reaction of cyclohexyl radicals with O2
Source: Royal Society of Chemistry journal article supplement (doi:10.1039/b705934e), 2007-01-01
Supplement: b705934e.zip [file b705934e.zip]

Archive with 2 entries (2 files):
- Master Equation k readme.pdf
- Master equation k.xls
