# Supplementary material for: Theory, measurements, and modeling of OH and HO2 formation in the reaction of cyclohexyl radicals with O2
Source: Royal Society of Chemistry journal article supplement (doi:10.1039/b705934e), 2007-01-01
Supplement: b705934e.zip [file b705934e.zip › Master equation k.xls]

## Sheet: rho=8.5e17
r=c6h11+o2		ro2	qooh-1	qooh-2	qooh-3	cyC6H10+HO2	epo-1+OH	C6H10O+OH	epo-3+OH
r->	r	w1	w2	w3	w4	p1	p2	p5	p6
rho=8.5e17
302	-	1.61e-11	1.62e-17	2.42e-14	8.21e-16	9e-15	5.94e-16	2.89e-16	6.81e-17
353	-	1.3e-11	1.37e-17	2.8e-14	1.2e-15	1.59e-14	1.02e-15	8.52e-16	2.39e-16
403	-	1.09e-11	1.2e-17	3.41e-14	1.76e-15	2.95e-14	1.88e-15	2.39e-15	7.35e-16
453	-	9.3e-12	1.15e-17	4.21e-14	2.47e-15	5.54e-14	3.51e-15	6.16e-15	1.96e-15
533	-	7.41e-12	1.5e-17	5.73e-14	3.64e-15	1.39e-13	8.75e-15	2.15e-14	6.91e-15
548	-	7.1e-12	1.7e-17	6.03e-14	3.83e-15	1.62e-13	1.02e-14	2.62e-14	8.38e-15
563	-	6.79e-12	1.99e-17	6.33e-14	4e-15	1.87e-13	1.18e-14	3.16e-14	1.01e-14
578	-	6.49e-12	2.43e-17	6.63e-14	4.16e-15	2.16e-13	1.35e-14	3.77e-14	1.19e-14
593	-	6.2e-12	3.15e-17	6.92e-14	4.3e-15	2.46e-13	1.54e-14	4.44e-14	1.4e-14
598	-	6.1e-12	3.49e-17	7.02e-14	4.34e-15	2.56e-13	1.61e-14	4.67e-14	1.47e-14
603	-	6e-12	3.92e-17	7.12e-14	4.38e-15	2.67e-13	1.68e-14	4.92e-14	1.55e-14
608	-	5.9e-12	4.48e-17	7.22e-14	4.42e-15	2.79e-13	1.74e-14	5.18e-14	1.63e-14
613	-	5.81e-12	5.19e-17	7.32e-14	4.46e-15	2.9e-13	1.81e-14	5.43e-14	1.7e-14
628	-	5.52e-12	9.74e-17	7.61e-14	4.57e-15	3.25e-13	2.03e-14	6.25e-14	1.95e-14
633	-	5.42e-12	1.35e-16	7.7e-14	4.6e-15	3.38e-13	2.1e-14	6.54e-14	2.04e-14
638	-	5.32e-12	2.15e-16	7.8e-14	4.63e-15	3.5e-13	2.17e-14	6.82e-14	2.12e-14
648	-	5.13e-12	??	7.99e-14	4.69e-15	3.75e-13	2.35e-14	7.41e-14	2.3e-14
653	-	5.04e-12	??	8.08e-14	4.71e-15	3.88e-13	2.43e-14	7.71e-14	2.39e-14
683	-	4.58e-12	??	8.63e-14	4.85e-14	4.66e-13	2.91e-14	9.58e-14	2.95e-14
698	-	4.19e-12	??	8.9e-14	4.9e-15	5.06e-13	3.16e-14	1.05e-13	3.23e-14
713	-	3.92e-12	??	9.16e-14	4.95e-15	5.46e-13	3.41e-14	1.15e-13	3.52e-14
750	-	3.27e-12	??	9.76e-14	5.04e-15	6.4e-13	3.98e-14	1.37e-13	4.2e-14
780	-	2.78e-12	??	1.02e-13	5.09e-15	7.1e-13	4.41e-14	1.53e-13	4.71e-14
800	-	2.48e-12	??	1.04e-13	5.12e-15	7.51e-13	4.65e-14	1.62e-13	5e-14
w1->
302	3.68e-12	-	5.93e-09	2.18e-06	4.69e-09	1.62e-09	1.07e-10	2.58e-12	1.51e-13
353	3.11e-08	-	7.65e-07	0.000303	8.85e-07	1.84e-06	1.19e-07	8.61e-09	8.27e-10
403	1.89e-05	-	3.95e-05	0.0147	7.79e-05	0.000345	2.15e-05	3.79e-06	5.31e-07
453	0.00273	-	0.001	0.345	0.00313	0.0211	0.00125	0.000457	8.59e-05
533	1.07	-	0.0704	17.9	0.31	3.19	0.17	0.147	0.0379
548	2.66	-	0.146	33.4	0.635	6.96	0.362	0.354	0.0951
563	6.31	-	0.303	60.5	1.25	14.6	0.732	0.809	0.226
578	14.2	-	0.632	107	2.37	29.3	1.41	1.75	0.506
593	30.7	-	1.36	184	4.36	56.8	2.53	3.62	1.08
598	39.3	-	1.77	219	5.3	70.3	3.02	4.56	1.37
603	50	-	2.32	261	6.43	86.7	3.55	5.72	1.74
608	63.4	-	3.08	310	7.77	107	4.1	7.13	2.19
613	80	-	4.15	367	9.37	130	4.6	8.85	2.74
628	157	-	11.9	600	16.1	234	~10	16.4	5.25
633	194	-	18.9	704	19.2	283	18.6	20	6.46
638	240	-	34.3	824	22.8	340	22.4	24.2	7.9
648	363	-	??	1120	31.9	488	31.9	34.9	11.7
653	443	-	??	1300	37.6	581	38	41.6	14.1
683	1360	-	??	3130	96.3	1570	101	108	40
698	2290	-	??	4740	150	2480	159	162	63.8
713	3720	-	??	7080	230	3820	244	229	98
750	11000	-	??	18100	618	10100	641	376	242
780	23900	-	??	36800	1310	20200	1280	??	415
800	37900	-	??	57900	2110	30700	1940	??	??
w2->
302	4.22e-08	70.1	-	0.000165	-	0.317	3930	1.68e-08	1.47e-09
353	9.7e-06	227	-	0.0038	3.42e-05	15.8	57100	1.96e-06	2.49e-07
403	0.000426	745	-	0.0397	0.000607	238	363000	7.3e-05	1.22e-05
453	0.00863	2060	-	0.261	0.00557	1790	1410000	0.00142	0.000291
533	0.483	7650	-	3.23	0.093	18700	6690000	0.0841	0.0215
548	0.989	9460	-	5.05	0.154	27000	8500000	0.176	0.0461
563	2.04	11600	-	7.91	0.254	37900	10600000	0.372	0.0997
578	4.29	14100	-	12.5	0.421	52500	13200000	0.806	0.22
593	9.36	17000	-	20.3	0.719	71400	16100000	1.82	0.503
598	12.3	18100	-	24.1	0.852	79000	17200000	2.42	0.671
603	16.4	19200	-	28.7	1.03	87100	18300000	3.26	0.906
608	22	20300	-	34.5	1.24	95800	19500000	4.45	1.24
613	30.1	21500	-	41.9	1.52	106000	20800000	6.17	1.72
628	91.3	25400	-	85.6	3.13	139000	24900000	19.6	5.48
633	148	26700	-	119	4.33	152000	26400000	32.4	9.05
638	276	27900	-	187	6.72	166000	28000000	61.4	17.1
648	??	??	-	??	??	??	??	??	??
653	??	??	-	??	??	??	??	??	??
683	??	??	-	??	??	??	??	??	??
698	??	??	-	??	??	??	??	??	??
713	??	??	-	??	??	??	??	??	??
750	??	??	-	??	??	??	??	??	??
780	??	??	-	??	??	??	??	??	??
800	??	??	-	??	??	??	??	??	??
w3->
302	7.04e-06	2920	1.87e-05	-	5.14e-05	0.000246	0.000156	0.0415	1.76e-07
353	0.00259	12800	0.000538	-	0.00295	0.0221	0.00144	2.7	5.9e-05
403	0.181	47200	0.00667	-	0.074	0.718	0.0466	59.2	0.00494
453	5.1	145000	0.051	-	1.01	12.1	0.774	650	0.164
533	299	615000	0.839	-	24.3	416	26.1	11300	11.3
548	562	774000	1.42	-	39.7	727	45.4	17500	21.6
563	1020	962000	2.43	-	63.1	1240	77	26500	39.8
578	1810	1180000	4.3	-	98	2060	127	39000	70.9
593	3100	1440000	8.01	-	149	3340	205	56400	123
598	3690	1540000	10	-	170	3910	239	63500	146
603	4390	1640000	12.7	-	195	4560	278	71300	173
608	5200	1740000	16.3	-	222	5310	322	79900	206
613	6140	1850000	21.3	-	252	6170	371	89400	243
628	9950	2210000	57	-	367	9550	549	124000	393
633	11600	2340000	89.3	-	415	11000	699	138000	459
638	13600	2470000	160	-	468	12700	803	153000	534
648	18400	2760000	??	-	592	16600	1050	187000	720
653	21300	2910000	??	-	665	19000	1210	206000	833
683	49400	3930000	??	-	1300	41000	2590	360000	1900
698	73400	4530000	??	-	1780	58800	3720	467000	2790
713	108000	5170000	??	-	2440	83500	5270	600000	4030
750	259000	6960000	??	-	5120	188000	11800	1060000	9340
780	501000	8550000	??	-	9180	345000	21700	1630000	17400
800	758000	9620000	??	-	13500	506000	31800	2120000	25500
w4->
302	1.01e-06	26.5	-	0.000217	-	1.59e-05	1.29e-06	1.51e-07	0.143
353	0.000458	153	2e-05	0.0121	-	0.0022	0.000144	4.92e-05	11.9
403	0.0378	1020	0.000415	0.301	-	0.101	0.00651	0.0041	302
453	1.19	5330	0.0044	4.06	-	2.16	0.138	0.136	3610
533	72.9	43500	0.103	98.1	-	88.9	5.58	8.94	64700
548	136	60100	0.187	160	-	157	9.83	16.8	99300
563	245	81500	0.345	256	-	269	16.8	30.6	148000
578	427	108000	0.655	399	-	446	27.7	53.5	215000
593	721	142000	1.31	608	-	722	44.5	90.7	305000
598	853	155000	1.67	697	-	842	51.7	107	341000
603	1000	168000	2.16	797	-	980	60	127	380000
608	1180	183000	2.83	910	-	1140	69.3	149	423000
613	1390	198000	3.78	1040	-	1320	83.4	174.8	469000
628	2210	250000	10.8	1520	-	2020	128	277	634000
633	2560	270000	17.2	1720	-	2310	146	322	698000
638	2970	290000	31.5	1940	-	2650	167	372	768000
648	3950	334000	??	2460	-	3450	218	494	923000
653	4550	358000	??	2770	-	3920	248	567	1010000
683	10100	528000	??	5460	-	8200	517	1240	1670000
698	14700	631000	??	7560	-	11600	732	1780	2110000
713	21200	747000	??	10400	-	16200	1020	2520	2630000
750	49000	1090000	??	22200	-	35300	2220	5530	4350000
780	92300	1410000	??	40200	-	63500	3990	9790	6310000
800	138000	1650000	??	59300	-	92300	5800	13900	7940000

## Sheet: T=638
r=c6h11+o2		ro2	qooh-1	qooh-2	qooh-3	cyC6H10+HO2	epo-1+OH	C6H10O+OH	epo-3+OH
r->	r	w1	w2	w3	w4	p1	p2	p5	p6
P=10	-	3.83e-12	-	7.1e-14	4.14e-15	8.96e-13	5.63e-14	2.1e-13	6.07e-14
P=20	-	4.51e-12	-	7.73e-14	4.56e-15	6.4e-13	4.01e-14	1.43e-13	4.2e-14
P=30	-	4.86e-12	-	7.95e-14	4.67e-15	5.12e-13	3.21e-14	1.1e-13	3.28e-14
P=40	-	5.09e-12	-	7.96e-14	4.69e-15	4.32e-13	2.71e-14	8.94e-14	2.71e-14
P=50	-	5.25e-12	-	7.88e-14	4.66e-15	3.77e-13	2.36e-14	7.51e-14	2.31e-14
P=60	-	5.37e-12	-	7.74e-14	4.61e-15	3.35e-13	2.1e-14	6.45e-14	2.02e-14
w1->
P=10	207	-	-	891	15.5	277	18.4	28.3	9.28
P=20	220	-	-	830	18.3	309	20.4	29.3	9.33
P=30	228	-	-	821	20	323	21.3	28	8.93
P=40	234	-	-	820	21.3	332	21.9	26.5	8.51
P=50	238	-	-	822	22.3	337	22.2	25	8.12
P=60	242	-	-	825	23.1	342	22.5	23.7	7.77
w2->
P=10	-	-	-	-	-	-	-	-	-
P=20	-	-	-	-	-	-	-	-	-
P=30	-	-	-	-	-	-	-	-	-
P=40	-	-	-	-	-	-	-	-	-
P=50	-	-	-	-	-	-	-	-	-
P=60	-	-	-	-	-	-	-	-	-
w3->
P=10	17400	1750000	-	-	523	20600	1320	54500	1080
P=20	15900	2070000	-	-	512	17300	1100	87900	841
P=30	15100	2240000	-	-	501	15500	985	112000	717
P=40	14500	2350000	-	-	489	14200	902	130000	632
P=50	13900	2430000	-	-	476	13200	837	145000	567
P=60	13400	2490000	-	-	463	12400	784	157000	516
w4->
P=10	3330	181000	-	2540	-	3590	229	635	358000
P=20	3250	224000	-	2290	-	3290	209	553	503000
P=30	3170	250000	-	2160	-	3060	194	487	601000
P=40	3090	268000	-	2060	-	2880	182	435	676000
P=50	3010	283000	-	1980	-	2730	173	394	736000
P=60	2940	294000	-	1910	-	2600	164	360	786000

## Sheet: rho=3.65e17
r=c6h11+o2		ro2	qooh-1	qooh-2	qooh-3	cyC6H10+HO2	epo-1+OH	C6H10O+OH	epo-3+OH
r->	r	w1	w2	w3	w4	p1	p2	p5	p6
rho=3.65e17
491	-	8.11e-12	7.64e-18	5.87e-14	4.16e-15	1.82e-13	1.15e-14	3.1e-14	9.57e-15
530	-	7.14e-12	1.13e-17	6.35e-14	4.45e-15	2.65e-13	1.67e-14	4.98e-14	1.52e-14
570	-	6.2e-12	2.28e-17	6.87e-14	4.61e-15	3.7e-13	2.33e-14	7.5e-14	2.26e-14
600	-	5.52e-12	6.8e-17	7.28e-14	4.65e-15	4.6e-13	2.88e-14	9.72e-14	2.9e-14
630	-	4.85e-12	1.31e-16	7.73e-14	4.63e-15	5.54e-13	3.47e-14	1.21e-13	3.58e-14
670	-	4e-12	-	8.4e-14	4.58e-15	6.78e-13	4.25e-14	1.53e-13	4.49e-14
700	-	3.41e-12	-	8.98e-14	4.52e-15	7.64e-13	4.78e-14	1.75e-13	5.12e-14
720	-	3.03e-12	-	9.43e-14	4.48e-15	8.18e-13	5.11e-14	1.89e-13	5.52e-14
750	-	2.52e-12	-	1.02e-13	4.42e-15	8.86e-13	5.52e-14	2.06e-13	6.02e-14
780	-	2.05e-12	-	1.12e-13	4.35e-15	9.4e-13	5.85e-14	2.18e-13	6.43e-14
800	-	1.78e-12	-	1.2e-13	4.29e-15	9.67e-13	6e-14	2.23e-13	6.64e-14
w1>	r	w1	w2	w3	w4	p1	p2	p5	p6
491	0.0675	-	0.0067	2.47	0.0312	0.278	0.0173	0.0144	0.00332
530	0.947	-	0.0504	14.9	0.243	2.67	0.153	0.181	0.0466
570	9.48	-	0.411	75.7	1.48	19.7	0.976	1.61	0.45
600	42.5	-	3	228	4.91	73	4.97	6.5	1.9
630	161	-	11.5	635	14.5	236	15.7	21.7	6.75
670	752	-	-	2250	53.6	931	60.5	78.9	27.9
700	2050	-	-	5460	131	2280	147	155	66.6
720	3720	-	-	9660	230	3910	250	185	108
750	8220	-	-	22100	510	8000	510	??	186
780	15800	-	-	49500	1080	14500	920	??	331
800	21900	-	-	83600	1720	19600	1240	??	??
w2>	r	w1	w2	w3	w4	p1	p2	p5	p6
491	0.0571	2940	-	0.874	0.0197	2050	2050000	0.015	0.00354
530	0.422	5090	-	2.8	0.0757	5860	4010000	0.108	0.0282
570	3.66	8420	-	9.85	0.31	14800	7230000	0.935	0.261
600	29.8	11800	-	35.7	1.18	27500	10700000	7.71	2.24
630	130	-	-	71.7	2.24	-	-	33	9.65
670	-	-	-	-	-	-	-	-	-
700	-	-	-	-	-	-	-	-	-
720	-	-	-	-	-	-	-	-	-
750	-	-	-	-	-	-	-	-	-
780	-	-	-	-	-	-	-	-	-
800	-	-	-	-	-	-	-	-	-
w3>	r	w1	w2	w3	w4	p1	p2	p5	p6
491	56.8	282000	0.197	-	7.1	110	7.15	2090	2.81
530	331	536000	0.756	-	27.3	519	33.2	7230	17
570	1600	951000	3.63	-	90.1	2110	132	21500	82.7
600	4610	1390000	20.2	-	200	5460	350	43900	237
630	12200	1970000	67.1	-	420	13100	839	83800	615
670	39900	2970000	-	-	1060	38700	2460	182000	1950
700	91100	3890000	-	-	2060	82500	5230	308000	4300
720	154000	4560000	-	-	3200	134000	8480	427000	7100
750	329000	5580000	-	-	6210	270000	17000	678000	14500
780	681000	6420000	-	-	12300	531000	33500	1040000	28500
800	1090000	6670000	-	-	19500	824000	52000	1360000	43900
w4->	r	w1	w2	w3	w4	p1	p2	p5	p6
491	15.4	14700	0.0188	29	-	23.5	1.51	2.5	13900
530	86.9	36700	0.0917	113	-	115	7.3	14.4	47700
570	392	80900	0.56	378	-	458	28.7	65	135000
600	1050	135000	3.72	856	-	1140	72.4	174	263000
630	2570	211000	13.7	1830	-	2590	165	420	473000
670	7540	354000	-	4770	-	6990	442	1190	938000
700	15800	497000	-	9520	-	13800	871	2390	1480000
720	25100	608000	-	15100	-	21200	1340	3670	1950000
750	48500	795000	-	29900	-	38900	2460	6550	2880000
780	89900	993000	-	60400	-	69000	4350	10700	4110000
800	133000	1120000	-	97400	-	98800	6220	13700	5130000
